# Supplementary material for: Metformin Abrogates Age-Associated Ovarian Fibrosis
Source: Oxford University Press journal article supplement (doi:10.1158/1078-0432.ccr-19-0603), 2019-10-09
Supplement: 10780432ccr190603-sup-217177_4_supp_5793581_pykfpl.xlsx [file 10780432ccr190603-sup-217177_4_supp_5793581_pykfpl.xlsx]

## Sheet: Log2FC
	Metformin vs. fibrotic					Fibrotic vs. Non-fibrotic					Metformin vs. non-fibrotic
	ensembl_gene_id	log2FC	p-value			ensembl_gene_id	log2FC	p-value			ensembl_gene_id	log2FC	p-value
TNFSF10	ENSG00000121858	-1.595	3.75701e-09		MEF2C	ENSG00000081189	0.561696	0.000116341		TNFSF10	ENSG00000121858	-1.27961	8.16292e-08
CASP8	ENSG00000064012	-0.850339	1.51876e-06		CD207	ENSG00000116031	2.09265	0.000179901		BMI1	ENSG00000168283	-1.02436	2.8144e-07
FYN	ENSG00000010810	-0.937503	2.37839e-05		CD8B	ENSG00000172116	1.96762	0.000231497		CD55	ENSG00000196352	-0.77277	3.83831e-06
CFI	ENSG00000205403	-1.44045	3.21957e-05		PSMB9	ENSG00000240118	0.660667	0.000354297		MR1	ENSG00000153029	0.609607	4.05776e-06
CD244	ENSG00000122223	2.77925	9.83496e-05		DUSP4	ENSG00000120875	2.23236	0.000390757		IL13RA1	ENSG00000131724	-0.884355	4.14261e-06
TAB1	ENSG00000100324	-0.394762	0.000105943		C8G	ENSG00000176919	1.31142	0.000403552		CFI	ENSG00000205403	-1.61844	4.21004e-06
CD55	ENSG00000196352	-0.618549	0.000110031		CCL22	ENSG00000102962	2.12991	0.000645508		CD207	ENSG00000116031	2.68243	4.8391e-06
TLR5	ENSG00000187554	0.760332	0.000201571		HLA-A	ENSG00000206503	1.23358	0.000922938		LRRN3	ENSG00000173114	1.38046	6.91407e-06
ARG2	ENSG00000081181	3.53265	0.00022033		GZMB	ENSG00000100453	2.37956	0.000983576		PSEN2	ENSG00000143801	0.50417	6.95056e-06
RORA	ENSG00000069667	0.844538	0.00022808		CCL1	ENSG00000108702	1.85535	0.0010403		APOE	ENSG00000130203	2.23227	7.98909e-06
BMI1	ENSG00000168283	-0.612974	0.000404517		MAPKAPK2	ENSG00000162889	0.775391	0.0012666		CD83	ENSG00000112149	1.48273	1.10109e-05
JAK3	ENSG00000105639	0.499495	0.000419158		STAT2	ENSG00000170581	-1.17072	0.00127449		ATG10	ENSG00000152348	-0.849917	1.37868e-05
ATG7	ENSG00000197548	-0.250197	0.000465177		LGALS3	ENSG00000131981	-0.379663	0.00135028		CD8B	ENSG00000172116	2.22532	3.4895e-05
IL6R	ENSG00000160712	-0.715341	0.000481468		PIN1	ENSG00000127445	-0.449299	0.0015		CD1E	ENSG00000158488	1.88991	5.33536e-05
ANP32B	ENSG00000136938	0.302163	0.000650962		IL1RL1	ENSG00000115602	1.87641	0.00158863		CCL1	ENSG00000108702	2.32288	5.8159e-05
DDX58	ENSG00000107201	-0.759592	0.000800135		PRF1	ENSG00000180644	1.41319	0.00164445		MAP2K1	ENSG00000169032	0.459239	5.8202e-05
MR1	ENSG00000153029	0.404098	0.000903867		IKBKB	ENSG00000104365	-0.695509	0.00184021		DPP4	ENSG00000197635	-3.48427	6.72894e-05
PSEN2	ENSG00000143801	0.346075	0.00093695		XCL2	ENSG00000143185	2.11508	0.0019515		CCL13	ENSG00000181374	2.50496	7.26919e-05
DPP4	ENSG00000197635	-2.83118	0.00098693		IL22	ENSG00000127318	1.77491	0.00232495		ARG2	ENSG00000081181	3.74499	7.40264e-05
IL13RA1	ENSG00000131724	-0.581142	0.0010001		ITGAL	ENSG00000005844	1.28844	0.00232994		TLR5	ENSG00000187554	0.797811	7.62253e-05
CASP3	ENSG00000164305	0.320826	0.00104473		IL23A	ENSG00000110944	1.88681	0.00242451		CCR3	ENSG00000183625	2.41984	7.69238e-05
APP	ENSG00000142192	-0.678293	0.0011334		TFE3	ENSG00000068323	0.257937	0.00280073		IL22	ENSG00000127318	2.3384	8.8337e-05
SOCS1	ENSG00000185338	1.90072	0.00119176		CD58	ENSG00000116815	0.670065	0.00293197		CASP8	ENSG00000064012	-0.597818	0.000105544
IFI16	ENSG00000163565	-0.49055	0.00166397		MAP2K1	ENSG00000169032	0.327821	0.00296119		IL13	ENSG00000169194	2.11698	0.000107757
TLR4	ENSG00000136869	-0.927834	0.00192683		KLRK1	ENSG00000213809	2.13691	0.00303962		C5	ENSG00000106804	0.571412	0.000125998
APOE	ENSG00000130203	1.42804	0.00202468		AMBP	ENSG00000106927	1.45149	0.00323683		C8G	ENSG00000176919	1.40276	0.000128235
ITGA2B	ENSG00000005961	0.641157	0.00232948		CT45A1	ENSG00000268940	1.48478	0.00392501		CD28	ENSG00000178562	2.14557	0.00012874
PNMA1	ENSG00000176903	0.463206	0.0027432		PDCD1	ENSG00000276977	1.6681	0.00399555		PPARG	ENSG00000132170	-1.20573	0.000130509
NRP1	ENSG00000099250	-0.728081	0.00274786		PSEN1	ENSG00000080815	-0.207064	0.00428701		C7	ENSG00000112936	-1.04592	0.000137375
C5	ENSG00000106804	0.436461	0.00286665		ATG7	ENSG00000197548	0.195736	0.00470329		ISG20	ENSG00000172183	1.46616	0.000143804
NFATC3	ENSG00000072736	0.223816	0.00321779		CREBBP	ENSG00000005339	0.492505	0.00496706		CT45A1	ENSG00000268940	1.97188	0.000163167
NOTCH1	ENSG00000148400	0.80716	0.00341359		IGF2R	ENSG00000197081	-0.375272	0.00549416		TREM1	ENSG00000124731	2.83457	0.000201491
LRRN3	ENSG00000173114	0.819508	0.00357672		IL12RB2	ENSG00000081985	1.84116	0.00584212		CD58	ENSG00000116815	0.841923	0.000208685
CD28	ENSG00000178562	1.58265	0.00393306		PVR	ENSG00000073008	0.50977	0.0058583		AMBP	ENSG00000106927	1.84218	0.000211809
LGALS3	ENSG00000131981	0.335583	0.00409442		CD247	ENSG00000198821	1.80583	0.0059175		DUSP4	ENSG00000120875	2.26163	0.000231418
MNX1	ENSG00000130675	1.50396	0.00417658		IL22RA1	ENSG00000142677	1.40135	0.00599097		ATG16L1	ENSG00000085978	0.772455	0.000232613
ISG20	ENSG00000172183	1.07709	0.0044049		IL24	ENSG00000162892	1.49145	0.00607374		IRGM	ENSG00000237693	2.35207	0.000261627
PRG2	ENSG00000186652	1.60219	0.00486549		CXCR3	ENSG00000186810	1.60605	0.00621218		TNFRSF10B	ENSG00000120889	1.52145	0.000276686
C3	ENSG00000125730	-2.41212	0.00557812		CD1A	ENSG00000158477	1.76562	0.00621576		COL3A1	ENSG00000168542	-1.47529	0.000282865
VEGFA	ENSG00000112715	0.760294	0.00595194		CD1E	ENSG00000158488	1.22466	0.00624976		IL24	ENSG00000162892	1.9724	0.000312256
OSM	ENSG00000099985	1.21831	0.00657729		PRKCD	ENSG00000163932	-0.597612	0.00654611		CXCR2	ENSG00000180871	2.28169	0.000320194
ANXA1	ENSG00000135046	-0.670668	0.00684078		CCL19	ENSG00000172724	1.60947	0.00690393		TAL1	ENSG00000162367	2.40079	0.000329155
CD83	ENSG00000112149	0.840346	0.00689149		TIGIT	ENSG00000181847	1.84946	0.00693167		LCN2	ENSG00000148346	2.10116	0.000332572
PSMB9	ENSG00000240118	-0.472984	0.00777507		IL25	ENSG00000166090	1.6173	0.00693787		TLR9	ENSG00000239732	0.728229	0.000333853
CDH1	ENSG00000039068	-1.16589	0.00804548		MAGEA3	ENSG00000221867	1.76133	0.00694343		C9	ENSG00000113600	2.36195	0.000335264
BST1	ENSG00000109743	-0.45056	0.00827006		TNFRSF17	ENSG00000048462	1.64703	0.00724549		GATA3	ENSG00000107485	2.19351	0.000348776
TLR9	ENSG00000239732	0.529494	0.00861503		SMAD2	ENSG00000175387	0.27038	0.00740947		PTGDR2	ENSG00000183134	1.73092	0.000367184
CD164	ENSG00000135535	0.275899	0.00878086		CEACAM6	ENSG00000086548	1.83284	0.00750052		IL25	ENSG00000166090	2.121	0.000411168
PRKCD	ENSG00000163932	0.565977	0.00988971		LCN2	ENSG00000148346	1.55198	0.00762607		CCL19	ENSG00000172724	2.09337	0.000446143
IL1B	ENSG00000125538	1.97667	0.0100948		CD38	ENSG00000004468	1.87792	0.0081925		IL1B	ENSG00000125538	2.69658	0.000459081
SLC11A1	ENSG00000018280	1.42219	0.0132987		ABL1	ENSG00000097007	-0.417826	0.00859607		CCL22	ENSG00000102962	2.11948	0.000473552
CSF1	ENSG00000184371	0.758906	0.013667		IL18RAP	ENSG00000115607	1.81423	0.00909852		XCL2	ENSG00000143185	2.35606	0.000476005
CKLF	ENSG00000217555	0.186368	0.0137562		UBC	ENSG00000150991	-0.678159	0.0092373		IFNL2	ENSG00000183709	2.51013	0.000484551
ATG16L1	ENSG00000085978	0.507939	0.0140473		MASP2	ENSG00000009724	1.70622	0.00938822		CDKN1A	ENSG00000124762	2.10773	0.000484567
NFKB1	ENSG00000109320	0.423126	0.015525		CD79B	ENSG00000007312	1.36231	0.00944556		GZMB	ENSG00000100453	2.4622	0.000486669
RRAD	ENSG00000166592	1.57345	0.0162894		KLRC2	ENSG00000205809	2.03789	0.00958249		FYN	ENSG00000010810	-0.695471	0.000533906
TNFSF14	ENSG00000125735	-2.28433	0.0166512		MAGEC2	ENSG00000046774	1.75265	0.00979817		GZMM	ENSG00000197540	2.34939	0.000565391
THBD	ENSG00000178726	-1.06858	0.016876		TNFRSF18	ENSG00000186891	1.44334	0.0103106		PRG2	ENSG00000186652	1.93691	0.000607422
TBK1	ENSG00000183735	0.340733	0.0173935		ITGB4	ENSG00000132470	1.41036	0.0104052		CXCL5	ENSG00000163735	1.69252	0.000684149
ZNF205	ENSG00000122386	-0.644977	0.0180689		RPS6	ENSG00000137154	0.495386	0.0112046		TFEB	ENSG00000112561	0.604747	0.00069598
LILRB2	ENSG00000131042	1.20921	0.0190279		MAPK1	ENSG00000100030	-0.381666	0.0115224		TFE3	ENSG00000068323	0.286056	0.000755986
CD200	ENSG00000091972	-0.682039	0.0196317		IL13	ENSG00000169194	1.32853	0.0122356		PDCD1	ENSG00000276977	1.92392	0.000771718
BCL2	ENSG00000171791	-0.614367	0.019932		CD274	ENSG00000120217	0.839751	0.0122787		TCF7	ENSG00000081059	0.766618	0.000773009
PRKCE	ENSG00000171132	-0.450522	0.0205727		KIR3DL2	ENSG00000275083	1.83181	0.0125875		SH2B2	ENSG00000160999	0.799215	0.000817793
TGFB2	ENSG00000092969	-0.757053	0.0212071		ATF2	ENSG00000115966	0.142044	0.0129667		TNFRSF18	ENSG00000186891	1.84817	0.000909182
ATG10	ENSG00000152348	-0.414224	0.0223333		KIR3DL3	ENSG00000276084	1.72057	0.0135022		IL1A	ENSG00000115008	2.45444	0.000975118
IRF2	ENSG00000168310	0.340995	0.0225405		BMI1	ENSG00000168283	-0.411389	0.0136031		RORA	ENSG00000069667	0.708937	0.00100869
CCL26	ENSG00000006606	1.22945	0.0227167		KIR_Activating_Subgroup_2	NA	1.81666	0.0140591		BST1	ENSG00000109743	-0.553851	0.00101528
LYN	ENSG00000254087	1.16782	0.0227524		GATA3	ENSG00000107485	1.49171	0.0143351		SOCS1	ENSG00000185338	1.86019	0.00105004
ATM	ENSG00000149311	1.04805	0.0232594		TLR10	ENSG00000174123	1.5843	0.0144949		CD247	ENSG00000198821	2.11492	0.0010693
ITGB4	ENSG00000132470	-1.24635	0.023884		GTF3C1	ENSG00000077235	-0.220662	0.0145584		ULBP2	ENSG00000131015	1.83611	0.00114034
REL	ENSG00000162924	1.00903	0.0239024		CD48	ENSG00000117091	1.54467	0.0149025		IL23R	ENSG00000162594	1.87656	0.00119698
CARD9	ENSG00000187796	0.744798	0.0243042		GZMM	ENSG00000197540	1.66004	0.0150375		OSM	ENSG00000099985	1.42433	0.00123956
CD9	ENSG00000010278	-0.665531	0.0243238		C7	ENSG00000112936	-0.646032	0.0157398		IL5	ENSG00000113525	2.32742	0.0012615
IL10	ENSG00000136634	1.38603	0.0264247		IKBKG	ENSG00000269335	-0.345797	0.0157546		FN1	ENSG00000115414	-1.317	0.00126429
PDGFRB	ENSG00000113721	0.296405	0.0268409		LIF	ENSG00000128342	2.06402	0.0158669		DDX58	ENSG00000107201	-0.69926	0.00128887
PLAUR	ENSG00000011422	0.918418	0.0281963		ATG10	ENSG00000152348	-0.435694	0.016086		VEGFA	ENSG00000112715	0.870574	0.00134065
TFRC	ENSG00000072274	1.14661	0.0301718		ROPN1	ENSG00000065371	1.09543	0.016471		HLA-DOB	ENSG00000243496	2.11123	0.00147183
IFITM1	ENSG00000185885	0.631865	0.030264		MST1R	ENSG00000164078	0.803613	0.0168873		IL1R2	ENSG00000115590	2.04618	0.00148307
RUNX3	ENSG00000020633	1.20918	0.0348652		CD70	NA	1.77796	0.0173266		ROPN1	ENSG00000065371	1.42456	0.00150297
PIN1	ENSG00000127445	0.294131	0.0357759		GZMK	ENSG00000113088	1.79262	0.0174885		CD274	ENSG00000120217	1.0419	0.00156488
IKBKB	ENSG00000104365	0.460974	0.037713		TIRAP	ENSG00000150455	-0.293229	0.0175288		KLRF1	ENSG00000150045	1.46411	0.00158715
IKBKE	ENSG00000263528	-0.342134	0.0390698		TPTE	ENSG00000274391	1.39635	0.0180194		MEF2C	ENSG00000081189	0.423395	0.00162352
MARCO	ENSG00000019169	1.16332	0.0410502		IL2RB	ENSG00000100385	1.52915	0.0187871		TLR4	ENSG00000136869	-0.912326	0.00163507
IL26	ENSG00000111536	0.927182	0.0415246		CCL17	ENSG00000102970	1.43776	0.0189392		SSX4	ENSG00000268009	2.28995	0.00170617
PPARG	ENSG00000132170	-0.628975	0.0425557		TNFRSF10B	ENSG00000120889	0.969754	0.0191917		CD1A	ENSG00000158477	1.97829	0.00173415
MAPK1	ENSG00000100030	0.307335	0.0442035		IFNL2	ENSG00000183709	1.68217	0.019383		FOXP3	ENSG00000049768	1.52164	0.00178566
CFB	ENSG00000241534	-1.52518	0.0455659		CCR3	ENSG00000183625	1.3788	0.0194493		PRF1	ENSG00000180644	1.34998	0.00182675
IL4R	ENSG00000077238	-1.13624	0.0462749		CTCFL	ENSG00000124092	1.67202	0.0195562		CCL18	ENSG00000278006	2.26829	0.00187351
ADORA2A	ENSG00000128271	0.748053	0.0472337		TREM1	ENSG00000124731	1.73645	0.0206577		LTK	ENSG00000062524	1.90752	0.00189575
MICA	ENSG00000204520	0.446452	0.0474631		CCL16	ENSG00000275152	1.60749	0.0210954		TNFRSF13C	ENSG00000159958	1.95316	0.00189695
CDKN1A	ENSG00000124762	1.21046	0.0476416		ULBP2	ENSG00000131015	1.32076	0.0211036		ADA	ENSG00000196839	1.15504	0.00194495
KLRD1	ENSG00000134539	-1.29375	0.0491904		ZAP70	ENSG00000115085	0.956343	0.0217755		CD80	ENSG00000121594	1.98763	0.00195249
CCL13	ENSG00000181374	1.2066	0.0500405		DOCK9	ENSG00000088387	-0.434248	0.0221139		TYK2	ENSG00000105397	-0.301955	0.00202536
ECSIT	ENSG00000130159	-0.298027	0.0501039		SPO11	ENSG00000054796	1.46025	0.0237276		MAGEC2	ENSG00000046774	2.04678	0.0020536
CSF2	ENSG00000164400	1.17403	0.0507705		CSF2RB	ENSG00000100368	1.00912	0.0244152		TNFRSF10C	ENSG00000173535	1.67689	0.00226124
MAPK14	ENSG00000112062	0.170759	0.0515759		AXL	ENSG00000167601	-0.445972	0.0246077		PMCH	ENSG00000183395	1.56394	0.0023474
TGFB1	ENSG00000105329	0.554936	0.0522224		ECSIT	ENSG00000130159	0.337592	0.0248502		CD70	NA	2.21521	0.00239484
SH2D1A	ENSG00000183918	-1.03429	0.0532962		CXCL9	ENSG00000138755	1.57029	0.0252721		CSF2RB	ENSG00000100368	1.32619	0.0024029
IGF1R	ENSG00000140443	-0.388982	0.0548094		ICOSLG	ENSG00000160223	1.18229	0.0254037		PDGFC	ENSG00000145431	-0.996046	0.002558
CXCL5	ENSG00000163735	0.969894	0.0569789		TCF7	ENSG00000081059	0.513156	0.0258936		CASP3	ENSG00000164305	0.280584	0.00265291
HLA-E	ENSG00000236632	0.436956	0.0590367		FOXP3	ENSG00000049768	1.10985	0.0259311		LY9	ENSG00000122224	1.98527	0.00279003
RAG1	ENSG00000166349	0.629692	0.0626628		MAPK11	ENSG00000185386	-0.518783	0.0267559		IL1RL1	ENSG00000115602	1.69624	0.00290815
DEFB1	ENSG00000164825	1.11831	0.0637887		CD34	ENSG00000174059	-1.09404	0.0270418		CRP	ENSG00000132693	2.08316	0.00297609
TLR1	ENSG00000174125	-0.26683	0.0646171		BCL2	ENSG00000171791	0.582289	0.0277958		KIR3DL2	ENSG00000275083	2.10078	0.00329007
IL17B	ENSG00000127743	0.897887	0.0649258		IRGM	ENSG00000237693	1.40515	0.0278379		IFNA7	ENSG00000214042	1.26748	0.00332316
LAMP1	ENSG00000185896	-0.29795	0.0661444		CX3CR1	ENSG00000168329	-0.389011	0.0285946		ITK	ENSG00000113263	2.10023	0.0033295
CCL8	ENSG00000108700	1.32141	0.069437		SPACA3	ENSG00000141316	1.44383	0.0286213		TNFAIP3	ENSG00000118503	1.22473	0.00341685
PSMB8	ENSG00000230034	-0.253006	0.0697931		JAK2	ENSG00000096968	-0.263566	0.0292133		CD3D	ENSG00000167286	1.47771	0.0034867
TYK2	ENSG00000105397	-0.185243	0.0701831		CCL18	ENSG00000278006	1.62806	0.0294488		JAK3	ENSG00000105639	0.386972	0.00352099
IFNAR2	ENSG00000159110	-0.329826	0.0751238		IL5	ENSG00000113525	1.59202	0.0305575		ITGAL	ENSG00000005844	1.18652	0.0035492
COLEC12	ENSG00000158270	-0.949268	0.0764767		CD3D	ENSG00000167286	1.12643	0.0311355		KLRK1	ENSG00000213809	2.02372	0.00360984
BLNK	ENSG00000095585	1.28746	0.0784676		TAL1	ENSG00000162367	1.43359	0.0315475		ICOSLG	ENSG00000160223	1.48874	0.00369579
HMGB1	ENSG00000189403	-0.140157	0.082785		IL3	ENSG00000164399	1.27217	0.031732		MEFV	ENSG00000103313	1.92962	0.00372338
HLA-A	ENSG00000206503	-0.644287	0.0856011		IL5RA	ENSG00000091181	1.18277	0.0318513		ANP32B	ENSG00000136938	0.242449	0.00373028
CCR3	ENSG00000183625	1.04104	0.0871252		CCL13	ENSG00000181374	1.29836	0.0336303		TLR10	ENSG00000174123	1.82088	0.00384264
S100A8	ENSG00000143546	1.82373	0.0884101		TAB1	ENSG00000100324	0.202795	0.0347328		LILRA5	ENSG00000187116	1.74109	0.00396031
SMPD3	ENSG00000103056	-1.19375	0.0884615		LTF	ENSG00000012223	1.4432	0.0357847		CARD9	ENSG00000187796	0.920848	0.00405856
TNFRSF1B	ENSG00000028137	0.449894	0.0891878		PTGDR2	ENSG00000183134	1.01787	0.0364521		PNMA1	ENSG00000176903	0.427342	0.00408053
TNFAIP3	ENSG00000118503	0.753131	0.090201		BAGE	NA	0.928081	0.0373896		IL3	ENSG00000164399	1.63903	0.0041769
DDX43	ENSG00000080007	-1.06501	0.0910572		CD163	ENSG00000177575	0.700123	0.0375757		CD244	ENSG00000122223	1.85592	0.00419911
C9	ENSG00000113600	1.13976	0.0919618		ADA	ENSG00000196839	0.795384	0.038186		CD86	ENSG00000114013	1.46693	0.00422105
TNFSF15	ENSG00000181634	1.16256	0.0944048		DDX43	ENSG00000080007	1.2673	0.0392088		CEACAM6	ENSG00000086548	1.90124	0.00424238
PTGS2	ENSG00000073756	1.46278	0.0947916		CD24	ENSG00000272398	1.30345	0.0394004		IRF4	ENSG00000137265	1.56727	0.00432236
SMAD2	ENSG00000175387	-0.173313	0.0977056		CXCL16	ENSG00000161921	-0.660332	0.0394193		CXCR3	ENSG00000186810	1.61976	0.00438391
COL3A1	ENSG00000168542	-0.687988	0.0994052		LILRA5	ENSG00000187116	1.29203	0.0394401		MNX1	ENSG00000130675	1.44416	0.00439355
HLA-DOB	ENSG00000243496	1.15071	0.101162		LYN	ENSG00000254087	-1.06167	0.039758		MASP2	ENSG00000009724	1.81419	0.0044249
MYD88	ENSG00000172936	0.279256	0.101976		CD83	ENSG00000112149	0.642382	0.0403603		SPO11	ENSG00000054796	1.77922	0.00443877
TNFRSF10C	ENSG00000173535	0.95443	0.102393		IFNA17	ENSG00000234829	1.47993	0.0419814		IL21	ENSG00000138684	2.09004	0.00444287
CCL21	ENSG00000137077	-1.88191	0.102503		TNFSF8	ENSG00000106952	0.835651	0.0429539		AIRE	ENSG00000160224	1.72912	0.00444365
MAGEA4	ENSG00000147381	1.18095	0.102643		SH2D1A	ENSG00000183918	1.07502	0.04361		MAGEC1	ENSG00000155495	1.91973	0.00458584
NFATC4	ENSG00000100968	-0.328731	0.102807		ICOS	ENSG00000163600	1.70464	0.045249		NEFL	ENSG00000277586	1.50876	0.00460986
NCAM1	ENSG00000149294	0.321682	0.102835		NOD1	ENSG00000106100	0.260142	0.0462236		CEBPB	ENSG00000172216	1.5575	0.00466869
CXCR2	ENSG00000180871	1.06202	0.104851		LRRN3	ENSG00000173114	0.56095	0.0473801		CCL25	ENSG00000131142	1.8811	0.00479963
CCL25	ENSG00000131142	1.15579	0.106904		SH2B2	ENSG00000160999	0.482697	0.0476961		TIGIT	ENSG00000181847	1.87005	0.00481715
IL1A	ENSG00000115008	1.25876	0.108948		IL23R	ENSG00000162594	1.15898	0.0518222		CEACAM1	ENSG00000079385	1.62968	0.00486796
IL18R1	ENSG00000115604	0.874416	0.109987		CCR6	ENSG00000112486	0.820948	0.0523138		TNFRSF17	ENSG00000048462	1.66635	0.0050235
CTAGE1	ENSG00000212710	0.95647	0.113108		CXCL10	ENSG00000169245	1.47413	0.0531853		FPR2	ENSG00000171049	1.41186	0.00510099
PDGFC	ENSG00000145431	-0.559487	0.113927		COL3A1	ENSG00000168542	-0.787299	0.0537943		CCL16	ENSG00000275152	1.88197	0.00528022
CD40	ENSG00000101017	0.312655	0.114568		ABCB1	ENSG00000085563	0.406814	0.0542187		KIR3DL3	ENSG00000276084	1.88319	0.00528813
CD4	ENSG00000010610	0.808946	0.114802		CYFIP2	ENSG00000055163	0.522484	0.0550704		MAGEA3	ENSG00000221867	1.76066	0.0052977
VEGFC	ENSG00000150630	-0.420982	0.115402		SELE	ENSG00000007908	1.57703	0.0553514		RUNX3	ENSG00000020633	1.5384	0.00530384
IL21R	ENSG00000103522	1.08757	0.11556		CD80	ENSG00000121594	1.27173	0.0562729		FUT5	ENSG00000130383	1.90497	0.00533901
FLT3	ENSG00000122025	1.09183	0.116016		IFIT1	ENSG00000185745	-0.622765	0.0563759		FUT7	ENSG00000180549	1.64823	0.00560351
CD79A	ENSG00000105369	-1.03701	0.12092		CEACAM1	ENSG00000079385	1.15775	0.0563818		IL23A	ENSG00000110944	1.65071	0.00563005
CSF3R	ENSG00000119535	1.10094	0.121705		CXCR2	ENSG00000180871	1.21968	0.0564314		ILF3	ENSG00000129351	-0.27605	0.00583602
TOLLIP	ENSG00000078902	0.189501	0.121986		ICAM4	ENSG00000105371	1.3732	0.0578535		IFNA17	ENSG00000234829	1.9189	0.00596487
LTBR	NA	-0.287616	0.131182		GNLY	ENSG00000115523	2.14539	0.0586926		NRP1	ENSG00000099250	-0.640788	0.00600567
FN1	ENSG00000115414	-0.660138	0.13146		CCR1	ENSG00000163823	0.995046	0.0588541		SPACA3	ENSG00000141316	1.74669	0.00604553
CD81	ENSG00000110651	-0.167114	0.135255		CSF1R	ENSG00000182578	0.81258	0.0593663		IL2	ENSG00000109471	2.00267	0.00612586
TRAF2	ENSG00000127191	-0.213452	0.136866		LY9	ENSG00000122224	1.29932	0.0611502		TARP	NA	1.89617	0.00625105
FCGR1A	ENSG00000150337	1.00714	0.138423		C1QBP	ENSG00000108561	0.226591	0.0613934		IL5RA	ENSG00000091181	1.44359	0.00651037
FAS	ENSG00000026103	-0.32493	0.138634		CD86	ENSG00000114013	1.00265	0.0625892		ICOS	ENSG00000163600	2.20866	0.00670086
TFEB	ENSG00000112561	0.280874	0.139402		LAMP2	ENSG00000005893	-0.320171	0.0643583		ICAM4	ENSG00000105371	1.86601	0.0067275
HCK	ENSG00000101336	0.582349	0.140504		IFNB1	ENSG00000171855	1.45247	0.0653341		CFD	ENSG00000197766	2.7775	0.00679695
F12	ENSG00000131187	1.24679	0.142698		RORC	ENSG00000143365	1.79396	0.0654743		REL	ENSG00000162924	1.16726	0.00680328
STAT5B	ENSG00000173757	0.188474	0.146265		PPARG	ENSG00000132170	-0.576759	0.0659106		IFNB1	ENSG00000171855	2.01761	0.00689591
LTK	ENSG00000062524	0.966898	0.147149		CD79A	ENSG00000105369	1.19626	0.065934		IL18RAP	ENSG00000115607	1.81522	0.0069709
LY96	ENSG00000154589	-0.25302	0.147955		GZMA	ENSG00000145649	1.13466	0.065968		TPTE	ENSG00000274391	1.53743	0.00707764
MST1R	ENSG00000164078	-0.517314	0.148508		ITGA5	ENSG00000161638	0.516356	0.0661186		ARG1	ENSG00000118520	1.90576	0.00720483
ITCH	ENSG00000078747	0.124218	0.150981		IL12B	ENSG00000113302	1.54596	0.066994		CCL17	ENSG00000102970	1.58695	0.00736428
LRP1	ENSG00000123384	-0.325953	0.152939		C9	ENSG00000113600	1.2222	0.067374		CD38	ENSG00000004468	1.83731	0.00743999
LAIR2	ENSG00000275819	0.51368	0.155556		BAX	ENSG00000087088	0.330694	0.0675233		CD34	ENSG00000174059	-1.27138	0.00767848
TNFRSF12A	ENSG00000006327	0.782983	0.15558		ITGAX	ENSG00000140678	0.908656	0.0697663		IL17F	ENSG00000112116	1.99917	0.00789056
CD97	NA	-0.528965	0.161422		ISG15	ENSG00000187608	-1.21059	0.069867		CD24	ENSG00000272398	1.61003	0.00794474
CREB1	ENSG00000118260	-0.109629	0.161613		SMPD3	ENSG00000103056	1.25284	0.0713742		IL21R	ENSG00000103522	1.69283	0.00798814
C7	ENSG00000112936	-0.399893	0.16359		CD4	ENSG00000010610	-0.899589	0.0734037		TNFSF8	ENSG00000106952	1.03962	0.00848961
CEBPB	ENSG00000172216	0.846297	0.16485		IFNA8	ENSG00000120242	1.63098	0.0745762		IL2RB	ENSG00000100385	1.64636	0.00881082
CD1E	ENSG00000158488	0.665247	0.16591		AIRE	ENSG00000160224	1.1449	0.0747333		KIR_Activating_Subgroup_2	NA	1.85159	0.0095983
ITGA4	ENSG00000115232	0.732183	0.166021		MAGEA12	ENSG00000213401	1.18443	0.075671		IFNA8	ENSG00000120242	2.22079	0.00994416
IRGM	ENSG00000237693	0.946915	0.166175		IL2	ENSG00000109471	1.37394	0.0761323		C8A	ENSG00000157131	1.84428	0.0102566
SSX4	ENSG00000268009	1.1064	0.16645		FADD	ENSG00000168040	0.334702	0.0769188		TOLLIP	ENSG00000078902	0.288971	0.010341
IRF7	ENSG00000185507	-0.392344	0.166554		PMCH	ENSG00000183395	0.954437	0.0774023		NFKBIA	ENSG00000100906	1.13082	0.0104148
IL13	ENSG00000169194	0.788451	0.166635		CXCL2	ENSG00000081041	2.22298	0.0775889		PBK	ENSG00000168078	1.67177	0.0106826
PLA2G6	ENSG00000184381	-0.245984	0.169192		TFEB	ENSG00000112561	0.323873	0.0789259		IL8	NA	2.54287	0.0109881
PTGDR2	ENSG00000183134	0.713048	0.170458		ITGAE	ENSG00000083457	0.234127	0.079144		LTF	ENSG00000012223	1.67684	0.0109929
CYLD	ENSG00000083799	0.13509	0.172301		IL1R2	ENSG00000115590	1.18053	0.0796958		CXCL2	ENSG00000081041	2.99928	0.0113237
CXCR1	ENSG00000163464	0.613581	0.173954		CLEC4C	ENSG00000198178	-1.19569	0.0798903		CTCFL	ENSG00000124092	1.739	0.0118614
TREM1	ENSG00000124731	1.09811	0.174565		MICA	ENSG00000204520	-0.400713	0.0799082		CCL8	ENSG00000108700	1.72449	0.0120718
LTA	ENSG00000238130	0.690978	0.17597		TBX21	ENSG00000073861	0.797249	0.0810721		IKBKG	ENSG00000269335	-0.345299	0.0125471
TIRAP	ENSG00000150455	0.18018	0.176485		MAP3K5	ENSG00000197442	0.266969	0.082388		CTSG	ENSG00000100448	1.65644	0.0127178
TAL1	ENSG00000162367	0.967196	0.177263		CFD	ENSG00000197766	1.89183	0.083366		CDH1	ENSG00000039068	-1.05734	0.0127643
FPR2	ENSG00000171049	0.757977	0.177443		HLA-DRB3	ENSG00000196101	0.720046	0.0853999		MAPKAPK2	ENSG00000162889	0.566075	0.0129707
NFKB2	ENSG00000077150	0.311623	0.180325		TICAM2	ENSG00000243414	0.404645	0.0854055		NOTCH1	ENSG00000148400	0.65297	0.0135239
CXCL16	ENSG00000161921	0.459302	0.182326		CXCR6	ENSG00000172215	0.890161	0.088054		CD164	ENSG00000135535	0.250802	0.0136147
CXCL3	ENSG00000163734	1.31144	0.18673		APOE	ENSG00000130203	0.804227	0.0881156		GZMK	ENSG00000113088	1.79451	0.0137527
HSD11B1	ENSG00000117594	0.455851	0.188216		IL13RA1	ENSG00000131724	-0.303213	0.0890201		IL10	ENSG00000136634	1.47391	0.0142218
TLR8	ENSG00000101916	0.811138	0.189237		CTSW	ENSG00000172543	1.14831	0.0919418		FCGR1A	ENSG00000150337	1.51266	0.0146765
ATF2	ENSG00000115966	-0.0807231	0.195823		PIK3CG	ENSG00000105851	0.761256	0.0921657		ATM	ENSG00000149311	1.08266	0.0150405
BCL10	ENSG00000142867	-0.193653	0.19822		ITK	ENSG00000113263	1.27368	0.094439		PLA2G6	ENSG00000184381	-0.390288	0.0150979
HLA-DPA1	ENSG00000231389	0.532788	0.198469		MR1	ENSG00000153029	0.205509	0.0950115		STAT2	ENSG00000170581	-0.835463	0.0152381
EWSR1	ENSG00000182944	-0.176962	0.205749		KLRF1	ENSG00000150045	0.816453	0.0951457		PVR	ENSG00000073008	0.431574	0.0154816
KLRF1	ENSG00000150045	0.647657	0.212877		CCL11	ENSG00000172156	1.28335	0.0953215		CSF1	ENSG00000184371	0.718829	0.0156436
TNFRSF13C	ENSG00000159958	0.879688	0.213547		IFNA7	ENSG00000214042	0.765717	0.0958702		IL27	ENSG00000197272	1.55911	0.0160685
TNFSF13	ENSG00000161955	-0.269958	0.217855		ILF3	ENSG00000129351	-0.177771	0.0974558		CXCL14	ENSG00000145824	2.46122	0.0163942
SMAD3	ENSG00000166949	-0.101051	0.219295		CXCL14	ENSG00000145824	1.8206	0.0984326		KLRC2	ENSG00000205809	1.82097	0.0165758
CD1D	ENSG00000158473	-0.751676	0.219832		IFIH1	ENSG00000115267	-0.327534	0.099322		TNFSF15	ENSG00000181634	1.54494	0.0171822
CLEC6A	ENSG00000205846	0.809293	0.220938		CD8A	ENSG00000153563	1.1272	0.101388		IL1RN	ENSG00000136689	1.77576	0.0174718
CYFIP2	ENSG00000055163	-0.362839	0.221116		CSF3	ENSG00000108342	1.076	0.103097		RUNX1	ENSG00000159216	-1.4147	0.0176892
BATF	ENSG00000156127	0.770866	0.222032		CD160	ENSG00000117281	1.19491	0.10323		NFATC3	ENSG00000072736	0.171064	0.0189161
VCAM1	ENSG00000162692	0.618622	0.225914		MAGEB2	ENSG00000099399	1.06504	0.104737		CCR9	ENSG00000173585	1.76803	0.0189589
IL7	ENSG00000104432	0.73949	0.226262		CCL27	ENSG00000213927	0.940605	0.104771		CD160	ENSG00000117281	1.59519	0.0192313
UBC	ENSG00000150991	0.348462	0.228337		CASP8	ENSG00000064012	0.252521	0.10487		KLRC1	ENSG00000134545	1.18391	0.0194009
MAGEA1	ENSG00000198681	0.946479	0.230474		MAGEC1	ENSG00000155495	1.17109	0.107609		ITGA2B	ENSG00000005961	0.467654	0.0202049
TNFRSF10B	ENSG00000120889	0.551695	0.230514		THBS1	ENSG00000137801	-1.04286	0.108048		PSMB8	ENSG00000230034	-0.303635	0.021338
NOD1	ENSG00000106100	-0.171186	0.233375		RELB	ENSG00000104856	0.577962	0.108571		BID	ENSG00000015475	1.19003	0.0219821
IL1R2	ENSG00000115590	0.86566	0.236076		TNFRSF13C	ENSG00000159958	1.07347	0.109055		SH2D1B	ENSG00000198574	1.4948	0.0220638
TREM2	ENSG00000095970	0.366662	0.238463		NLRC5	ENSG00000140853	0.44908	0.109355		CEACAM8	ENSG00000124469	1.45736	0.0221833
SH2B2	ENSG00000160999	0.316518	0.239394		IRF4	ENSG00000137265	0.939234	0.112212		CCL3	ENSG00000278567	1.55957	0.0228291
GTF3C1	ENSG00000077235	0.118595	0.240221		A2M	ENSG00000175899	0.406333	0.11492		IFIT1	ENSG00000185745	-0.706259	0.0230303
IRF8	ENSG00000140968	0.527755	0.242524		SH2D1B	ENSG00000198574	1.11335	0.114953		TGFB1	ENSG00000105329	0.618957	0.0232298
CRP	ENSG00000132693	0.940099	0.243554		IFI35	ENSG00000068079	-0.564472	0.11562		CCL26	ENSG00000006606	1.18158	0.0234682
C8B	ENSG00000021852	0.757914	0.246032		PLAUR	ENSG00000011422	-0.684232	0.117319		LAG3	ENSG00000089692	0.575745	0.0236106
MAPK8	ENSG00000107643	-0.167482	0.246168		NEFL	ENSG00000277586	0.900299	0.11757		IFI16	ENSG00000163565	-0.336341	0.0236943
IL32	ENSG00000008517	-0.710218	0.249559		IL27	ENSG00000197272	1.09817	0.118129		S100A12	ENSG00000163221	1.65354	0.0237615
LAMP2	ENSG00000005893	0.219422	0.249594		TNFSF10	ENSG00000121858	0.315391	0.118276		IKBKE	ENSG00000263528	-0.3598	0.0238051
BID	ENSG00000015475	0.694595	0.249641		LILRB2	ENSG00000131042	-0.843818	0.118321		CXCR6	ENSG00000172215	1.10224	0.0242979
CD46	ENSG00000117335	-0.127183	0.252205		MEFV	ENSG00000103313	1.12023	0.118461		IGF2R	ENSG00000197081	-0.293123	0.0247128
TNFRSF14	ENSG00000157873	0.232103	0.25468		THY1	ENSG00000154096	-1.17448	0.120702		MARCO	ENSG00000019169	1.21818	0.0258307
CLEC7A	ENSG00000172243	0.903128	0.254817		ATG5	ENSG00000057663	-0.201731	0.122144		JAK2	ENSG00000096968	-0.258943	0.0264221
TP53	ENSG00000141510	-0.195007	0.255784		TBK1	ENSG00000183735	-0.232199	0.122895		SLC11A1	ENSG00000018280	1.23556	0.0265047
ABL1	ENSG00000097007	0.203215	0.257227		RUNX1	ENSG00000159216	-0.999943	0.123138		CASP10	ENSG00000003400	0.550694	0.0266109
NOD2	ENSG00000167207	0.809763	0.25737		IFNL1	ENSG00000182393	-1.15711	0.12506		BTK	ENSG00000010671	1.00984	0.0266969
HLA-DRB3	ENSG00000196101	-0.518816	0.257433		MX1	ENSG00000157601	-0.533021	0.126686		ANXA1	ENSG00000135046	-0.531716	0.0267137
CD3EAP	ENSG00000117877	-0.313797	0.259137		HMGB1	ENSG00000189403	0.125934	0.127484		ISG15	ENSG00000187608	-1.40128	0.026718
IFITM2	ENSG00000185201	0.316757	0.263077		C8A	ENSG00000157131	1.19094	0.12866		ZAP70	ENSG00000115085	0.892752	0.0269054
MICB	ENSG00000204516	0.775441	0.263267		IL6R	ENSG00000160712	0.316741	0.128696		MAF	ENSG00000178573	0.459995	0.0269117
DOCK9	ENSG00000088387	0.2399	0.263573		SSX4	ENSG00000268009	1.18355	0.131884		BAGE	NA	0.948798	0.0269486
ITGAM	ENSG00000169896	0.372277	0.266408		IL1A	ENSG00000115008	1.19567	0.132419		POU2AF1	ENSG00000110777	1.51373	0.0270703
A2M	ENSG00000175899	-0.308646	0.270321		CRP	ENSG00000132693	1.14306	0.132679		LTA	ENSG00000238130	1.01011	0.027551
MPPED1	ENSG00000186732	0.695371	0.273315		SEMG1	ENSG00000124233	1.01778	0.133113		CFP	ENSG00000126759	1.1482	0.0285087
NFKBIA	ENSG00000100906	0.568325	0.275415		TPSAB1	ENSG00000172236	1.44586	0.133757		IL26	ENSG00000111536	0.953788	0.0291057
TNFSF18	ENSG00000120337	-0.60259	0.276261		FN1	ENSG00000115414	-0.656866	0.133858		CSF3	ENSG00000108342	1.33457	0.0302088
FOXJ1	ENSG00000129654	0.907076	0.277996		CCL3	ENSG00000278567	1.11981	0.134541		MAGEB2	ENSG00000099399	1.32574	0.0302667
MSR1	ENSG00000038945	0.437522	0.280505		IL34	ENSG00000157368	-0.987797	0.136258		TNFRSF4	ENSG00000186827	1.26498	0.0305757
FUT7	ENSG00000180549	0.754877	0.28329		KLRC1	ENSG00000134545	0.82503	0.136644		LILRA1	ENSG00000277398	1.00436	0.0311317
HLA-DMB	ENSG00000226264	0.427262	0.287318		IL21	ENSG00000138684	1.18798	0.138425		BTLA	ENSG00000186265	1.22491	0.0312591
IL23R	ENSG00000162594	0.717575	0.287498		ATG12	ENSG00000145782	0.400095	0.138884		HAVCR2	ENSG00000135077	0.634476	0.0318296
FUT5	ENSG00000130383	0.857212	0.291091		C3	ENSG00000125730	1.35706	0.140228		IL7	ENSG00000104432	1.14753	0.0319779
SPP1	ENSG00000118785	0.83966	0.295749		TNFSF14	ENSG00000125735	1.48437	0.142669		OAS3	ENSG00000111331	-1.01866	0.032372
MUC1	ENSG00000185499	-0.84643	0.297278		S100A12	ENSG00000163221	1.17093	0.144611		LCK	ENSG00000182866	1.19414	0.0323936
KLRB1	ENSG00000111796	-1.13717	0.297535		PSEN2	ENSG00000143801	0.158096	0.145153		CD9	ENSG00000010278	-0.610344	0.0331469
PBK	ENSG00000168078	0.815345	0.297888		MIF	ENSG00000240972	0.410677	0.145198		CCR1	ENSG00000163823	1.06996	0.0333492
MAP2K1	ENSG00000169032	0.131418	0.298531		IL17F	ENSG00000112116	1.2029	0.146089		CD79B	ENSG00000007312	1.08472	0.0334362
IL21	ENSG00000138684	0.90206	0.304139		BST2	ENSG00000130303	0.255524	0.148714		CTAGE1	ENSG00000212710	1.19313	0.033458
STAT1	ENSG00000115415	-0.400739	0.305353		ARG1	ENSG00000118520	1.12569	0.14948		IFITM2	ENSG00000185201	0.515935	0.0337061
TARP	NA	0.851897	0.305533		CEACAM8	ENSG00000124469	1.00983	0.15008		TICAM2	ENSG00000243414	0.470374	0.0338853
C2	ENSG00000231543	-0.688515	0.305845		TLR7	ENSG00000196664	0.561056	0.150935		DEFB1	ENSG00000164825	1.21768	0.0341398
IL10RA	ENSG00000110324	0.482728	0.307086		CCL21	ENSG00000137077	1.69449	0.151555		EWSR1	ENSG00000182944	-0.261837	0.0346528
MEFV	ENSG00000103313	0.809391	0.309245		CDK1	ENSG00000170312	-0.840558	0.152185		MAGEA4	ENSG00000147381	1.42757	0.0348132
CD22	ENSG00000012124	-0.220594	0.311627		FAS	ENSG00000026103	0.315364	0.153828		CXCL10	ENSG00000169245	1.54144	0.0348209
PSMB7	ENSG00000136930	-0.10376	0.316868		IL4	ENSG00000113520	1.17964	0.154618		TLR7	ENSG00000196664	0.750642	0.0351917
PMCH	ENSG00000183395	0.609506	0.323506		CKLF	ENSG00000217555	-0.115032	0.154631		RPS6	ENSG00000137154	0.399892	0.035335
IFNA2	ENSG00000188379	0.88279	0.324352		IL11RA	ENSG00000137070	-0.248054	0.154929		THY1	ENSG00000154096	-1.47174	0.0358916
CFP	ENSG00000126759	0.623587	0.326327		APP	ENSG00000142192	0.309772	0.155253		IL12B	ENSG00000113302	1.683	0.0362311
GATA3	ENSG00000107485	0.701802	0.327425		LAMP3	ENSG00000078081	1.16545	0.15664		CD81	ENSG00000110651	-0.215572	0.0362535
IFNL2	ENSG00000183709	0.827961	0.327507		IL15	ENSG00000164136	0.54669	0.156931		CD3G	ENSG00000160654	1.27189	0.0374565
TNFRSF11B	ENSG00000164761	0.925077	0.329882		ELK1	ENSG00000126767	-0.607264	0.1602		CSF2	ENSG00000164400	1.19854	0.0378391
MERTK	ENSG00000153208	0.195632	0.330165		LRP1	ENSG00000123384	0.321359	0.160422		ETS1	ENSG00000134954	0.297393	0.038397
CD6	ENSG00000013725	0.643135	0.330302		TLR2	ENSG00000137462	0.423472	0.160914		IL6R	ENSG00000160712	-0.3986	0.0385646
CR1	ENSG00000203710	0.572789	0.334467		MAF	ENSG00000178573	0.321845	0.161488		CD48	ENSG00000117091	1.27686	0.0388551
IFNA7	ENSG00000214042	0.501762	0.339915		LTK	ENSG00000062524	0.940624	0.161559		TAB1	ENSG00000100324	-0.191967	0.0389178
IRF5	ENSG00000128604	0.75118	0.340022		CDKN1A	ENSG00000124762	0.897275	0.166641		CHUK	ENSG00000213341	0.284708	0.0396643
CLU	ENSG00000120885	0.677907	0.343737		FUT5	ENSG00000130383	1.04776	0.167177		ITCH	ENSG00000078747	0.16263	0.0397174
ETS1	ENSG00000134954	0.165833	0.34401		XCR1	ENSG00000173578	0.627681	0.168857		C8B	ENSG00000021852	1.16455	0.0403005
ITK	ENSG00000113263	0.826557	0.344142		TNFSF13	ENSG00000161955	0.292759	0.170603		CD46	ENSG00000117335	-0.197223	0.0403889
STAT3	ENSG00000168610	0.189356	0.344279		HRAS	ENSG00000174775	-0.25865	0.176731		IL4R	ENSG00000077238	-1.12535	0.0405106
PRM1	ENSG00000175646	0.684973	0.346204		TARP	NA	1.04428	0.17737		CCL3L1	ENSG00000277796	1.7026	0.0405333
CD2	ENSG00000116824	-0.361989	0.346466		FUT7	ENSG00000180549	0.893356	0.178617		CXCR4	ENSG00000121966	1.33845	0.0409015
YTHDF2	ENSG00000198492	-0.218213	0.346861		LAG3	ENSG00000089692	0.382171	0.178638		IL7R	ENSG00000168685	1.18738	0.0412073
CD207	ENSG00000116031	0.589787	0.350356		THBD	ENSG00000178726	0.649947	0.178992		CD3E	ENSG00000198851	1.46874	0.0412274
IRF4	ENSG00000137265	0.628035	0.353002		CXCL5	ENSG00000163735	0.722626	0.183423		MS4A1	ENSG00000156738	1.26611	0.0412571
NEFL	ENSG00000277586	0.60846	0.353966		CD1C	ENSG00000158481	0.815124	0.184329		SIGIRR	ENSG00000185187	0.660901	0.041959
IL13RA2	ENSG00000123496	0.811761	0.354482		FOXJ1	ENSG00000129654	-1.04847	0.187505		CD27	ENSG00000139193	1.42419	0.042741
ATG5	ENSG00000057663	0.137534	0.354878		LTBR	NA	0.257908	0.188961		CYLD	ENSG00000083799	0.180619	0.0439674
CCL7	ENSG00000108688	-0.396606	0.35556		CASP10	ENSG00000003400	0.365078	0.190525		AXL	ENSG00000167601	-0.385965	0.0460473
TMEFF2	ENSG00000144339	0.833863	0.355714		HLA-DOB	ENSG00000243496	0.960524	0.191449		THBS1	ENSG00000137801	-1.21201	0.0462731
KIR_Activating_Subgroup_1	NA	-0.499347	0.356718		CD27	ENSG00000139193	1.02393	0.1917		CLEC6A	ENSG00000205846	1.16138	0.0469103
TCF7	ENSG00000081059	0.253462	0.357093		HLA-E	ENSG00000236632	-0.320125	0.197337		IL12RB2	ENSG00000081985	1.29443	0.0469294
HAVCR2	ENSG00000135077	0.334063	0.360859		TNFSF4	ENSG00000117586	-0.284672	0.198681		SPP1	ENSG00000118785	1.34842	0.047597
CCR4	ENSG00000183813	0.911926	0.361298		KLRB1	ENSG00000111796	1.32496	0.199836		MAP3K5	ENSG00000197442	0.28912	0.0476627
CD7	ENSG00000173762	-0.583576	0.363413		CFB	ENSG00000241534	1.05189	0.202931		CD8A	ENSG00000153563	1.27414	0.0492394
PASD1	ENSG00000166049	0.517385	0.363837		SLAMF1	ENSG00000117090	0.790819	0.205838		IGLL1	ENSG00000128322	1.02987	0.0518826
CD80	ENSG00000121594	0.715906	0.364143		NFATC4	ENSG00000100968	0.268158	0.207393		IFIT2	ENSG00000119922	-0.984172	0.0524835
IFI27	ENSG00000275214	-0.48011	0.365352		ITGA4	ENSG00000115232	-0.680934	0.207593		GNLY	ENSG00000115523	2.11052	0.0536407
SIGIRR	ENSG00000185187	0.361286	0.369148		IL8	NA	1.43238	0.207707		IFIH1	ENSG00000115267	-0.361701	0.0540408
TLR2	ENSG00000137462	-0.302767	0.375997		CD244	ENSG00000122223	-0.92333	0.208004		FLT3	ENSG00000122025	1.25086	0.0546794
IL8	NA	1.11049	0.376868		IL1RN	ENSG00000136689	1.06608	0.2098		MUC1	ENSG00000185499	-1.32571	0.0547152
MAGEC1	ENSG00000155495	0.748648	0.376929		BCL2L1	ENSG00000171552	0.162841	0.212273		CXCL9	ENSG00000138755	1.31952	0.0547811
IFNA1	ENSG00000197919	0.761096	0.377148		IL7R	ENSG00000168685	0.813427	0.216466		ITGAM	ENSG00000169896	0.556299	0.0549218
TNFRSF9	ENSG00000049249	0.629074	0.379664		CD276	ENSG00000103855	-0.274284	0.223822		F12	ENSG00000131187	1.50947	0.0549493
SLAMF7	ENSG00000026751	0.849039	0.380919		CTSG	ENSG00000100448	0.924931	0.225629		LAIR2	ENSG00000275819	0.636103	0.0556261
ARG1	ENSG00000118520	0.780071	0.382599		BCL10	ENSG00000142867	0.184117	0.2289		PSEN1	ENSG00000080815	-0.135022	0.0567516
CTSG	ENSG00000100448	0.731512	0.383423		IRF3	ENSG00000126456	0.215145	0.231464		CLEC7A	ENSG00000172243	1.31273	0.0576934
CCL15	ENSG00000275718	0.635591	0.38827		CD96	ENSG00000153283	1.12763	0.237869		ST6GAL1	ENSG00000073849	0.337782	0.0580226
LTB	ENSG00000204487	0.620766	0.394788		BLNK	ENSG00000095585	-0.937019	0.238615		CCR2	ENSG00000121807	1.05256	0.0583226
BTK	ENSG00000010671	0.490395	0.396544		CHIT1	ENSG00000133063	0.883956	0.239124		IL4	ENSG00000113520	1.43782	0.0596199
LILRA1	ENSG00000277398	0.49964	0.397815		OAS3	ENSG00000111331	-0.641328	0.242269		MSR1	ENSG00000038945	0.65564	0.060163
LCK	ENSG00000182866	0.596611	0.399598		CD19	ENSG00000177455	0.379897	0.244619		IL2RA	ENSG00000134460	1.25764	0.0610325
BAX	ENSG00000087088	-0.183478	0.400636		IGF1R	ENSG00000140443	0.259697	0.24528		TFRC	ENSG00000072274	0.964417	0.0630407
KIR_Inhibiting_Subgroup_2	NA	-0.287614	0.402426		IL2RG	ENSG00000147168	1.01511	0.246381		CARD11	ENSG00000198286	1.06825	0.0647793
CCR9	ENSG00000173585	0.803997	0.40425		ADORA2A	ENSG00000128271	-0.480981	0.250768		TNFRSF9	ENSG00000049249	1.07098	0.0651746
ITGA1	ENSG00000213949	-0.335396	0.405694		PDGFC	ENSG00000145431	-0.436559	0.251308		IL22RA1	ENSG00000142677	0.924613	0.0654214
IL17F	ENSG00000112116	0.796277	0.409932		CCL5	ENSG00000271503	1.00461	0.25217		TNFSF4	ENSG00000117586	-0.368213	0.0655047
CD19	ENSG00000177455	-0.295106	0.416974		TNFRSF10C	ENSG00000173535	0.722462	0.253528		TGFB2	ENSG00000092969	-0.595742	0.0657435
MEF2C	ENSG00000081189	-0.138301	0.418509		CSF3R	ENSG00000119535	-0.868839	0.255132		STAT5B	ENSG00000173757	0.221468	0.0657667
GZMM	ENSG00000197540	0.689352	0.419211		ATG16L1	ENSG00000085978	0.264516	0.257162		CREBBP	ENSG00000005339	0.316372	0.0665139
CREBBP	ENSG00000005339	-0.176133	0.420074		IL18	ENSG00000150782	0.365282	0.258604		APP	ENSG00000142192	-0.368521	0.0673517
LY9	ENSG00000122224	0.685955	0.420777		PBK	ENSG00000168078	0.856427	0.265094		LTB	ENSG00000204487	1.0685	0.0685318
RORC	ENSG00000143365	-0.959755	0.421461		FPR2	ENSG00000171049	0.653884	0.268158		CXCL3	ENSG00000163734	1.64376	0.0689578
TNFRSF4	ENSG00000186827	0.605335	0.422717		TNFSF12	ENSG00000239697	-0.164837	0.268739		SLAMF7	ENSG00000026751	1.43025	0.0690804
IL5	ENSG00000113525	0.735402	0.423209		ICAM3	ENSG00000076662	-0.322	0.269712		CD200	ENSG00000091972	-0.524227	0.0693795
PSEN1	ENSG00000080815	0.0720427	0.426789		HLA-DMA	ENSG00000241394	0.44145	0.270186		IL1RAPL2	ENSG00000189108	0.997307	0.0696169
TRAF3	ENSG00000131323	0.173198	0.430341		CEBPB	ENSG00000172216	0.711204	0.270352		RIPK2	ENSG00000104312	0.361779	0.0740384
POU2AF1	ENSG00000110777	0.700509	0.43171		YTHDF2	ENSG00000198492	0.244104	0.270585		CSF1R	ENSG00000182578	0.748775	0.0741986
SPANXB1	ENSG00000227234	0.793288	0.436983		BLK	ENSG00000136573	-0.493038	0.271399		CXCR1	ENSG00000163464	0.735204	0.076414
IL18	ENSG00000150782	-0.281151	0.438409		ZNF205	ENSG00000122386	0.337951	0.277751		PDGFRB	ENSG00000113721	0.234263	0.0768215
LILRB3	ENSG00000204577	0.365651	0.438469		CCR9	ENSG00000173585	0.964035	0.279112		LAMP3	ENSG00000078081	1.35001	0.0770531
JAK1	ENSG00000162434	0.0707984	0.439916		MERTK	ENSG00000153208	-0.210618	0.280007		CD22	ENSG00000012124	-0.328274	0.0770999
ALCAM	ENSG00000170017	0.155308	0.440084		CD3G	ENSG00000160654	0.775393	0.280108		SYCP1	ENSG00000198765	1.10567	0.0788707
IL22	ENSG00000127318	0.563484	0.441397		MS4A2	ENSG00000149534	0.87033	0.281312		ITGAX	ENSG00000140678	0.849429	0.0809792
CD14	ENSG00000170458	0.385052	0.445204		NFKBIA	ENSG00000100906	0.562497	0.282277		ELK1	ENSG00000126767	-0.698769	0.0817701
TAPBP	ENSG00000206208	-0.13381	0.446588		EOMES	ENSG00000163508	0.868819	0.282289		IL13RA2	ENSG00000123496	1.26258	0.0834562
KIT	ENSG00000157404	-0.287322	0.446592		SLAMF6	ENSG00000162739	0.859624	0.284447		ITGA2	ENSG00000164171	-0.727638	0.0847912
IRF1	ENSG00000125347	-0.465038	0.448105		CCL3L1	ENSG00000277796	1.02866	0.295791		STAT3	ENSG00000168610	0.288012	0.0862779
ENG	ENSG00000106991	-0.225944	0.449706		CD3E	ENSG00000198851	0.88944	0.296329		IL15	ENSG00000164136	0.615953	0.0872494
HAMP	ENSG00000105697	0.609397	0.456138		FYN	ENSG00000010810	0.242032	0.297163		MFGE8	ENSG00000140545	0.391212	0.0910418
TNF	ENSG00000204490	0.825687	0.459105		BTLA	ENSG00000186265	0.703576	0.298756		IL34	ENSG00000157368	-1.05795	0.0910749
CT45A1	ENSG00000268940	0.487097	0.460117		TYK2	ENSG00000105397	-0.116712	0.318024		TPSAB1	ENSG00000172236	1.53825	0.091668
ILF3	ENSG00000129351	-0.0982794	0.460829		IRF2	ENSG00000168310	-0.173714	0.320141		CHIT1	ENSG00000133063	1.13084	0.0924153
HLA-C	ENSG00000204525	0.472637	0.46196		KIR3DL1	ENSG00000275486	0.85995	0.320408		IFNA2	ENSG00000188379	1.28359	0.0924559
LCN2	ENSG00000148346	0.549185	0.464809		SBNO2	ENSG00000064932	0.195494	0.324449		EOMES	ENSG00000163508	1.18501	0.0932384
ADA	ENSG00000196839	0.359657	0.464976		C6	ENSG00000039537	-0.60968	0.325504		IL17B	ENSG00000127743	0.799178	0.0936369
MIF	ENSG00000240972	-0.249521	0.467964		IL15RA	ENSG00000134470	0.497041	0.326597		CTSH	ENSG00000103811	0.425811	0.093639
STAT2	ENSG00000170581	0.335258	0.467994		POU2AF1	ENSG00000110777	0.813216	0.32785		PRAME	ENSG00000185686	0.792598	0.0952567
MAP4K2	ENSG00000168067	-0.178467	0.46944		PRAME	ENSG00000185686	0.544627	0.329876		STAT1	ENSG00000115415	-0.560488	0.0968288
IL22RA1	ENSG00000142677	-0.476738	0.470568		HAMP	ENSG00000105697	-0.718305	0.341781		TP53	ENSG00000141510	-0.251864	0.098936
AIRE	ENSG00000160224	0.584227	0.473671		CD59	ENSG00000085063	0.172369	0.342594		CTSW	ENSG00000172543	1.08822	0.0996017
CHUK	ENSG00000213341	0.132231	0.474955		IRAK2	ENSG00000134070	-0.553352	0.347015		TNF	ENSG00000204490	1.42735	0.100833
MS4A1	ENSG00000156738	0.592048	0.475244		CARD11	ENSG00000198286	0.656112	0.34766		CTLA4	ENSG00000163599	1.27854	0.100955
MCAM	NA	-0.487003	0.479863		SYCP1	ENSG00000198765	0.707329	0.349054		PTGS2	ENSG00000073756	1.38718	0.102313
ITGA6	ENSG00000091409	-0.33428	0.480371		CMKLR1	ENSG00000174600	0.407145	0.352184		CCL15	ENSG00000275718	0.986543	0.103178
CD96	ENSG00000153283	-0.788006	0.482465		IL1R1	ENSG00000115594	-0.601961	0.353363		COLEC12	ENSG00000158270	-0.852099	0.104571
IL1RN	ENSG00000136689	0.709672	0.484651		BTK	ENSG00000010671	0.519445	0.356373		CLEC4C	ENSG00000198178	-1.08025	0.105969
CXCR4	ENSG00000121966	0.610094	0.491429		IGLL1	ENSG00000128322	0.59513	0.358681		HLA-A	ENSG00000206503	0.589293	0.107431
SPINK5	ENSG00000133710	0.700675	0.492597		RAG1	ENSG00000166349	-0.364252	0.360531		CD1C	ENSG00000158481	0.916899	0.107935
ULBP2	ENSG00000131015	0.515348	0.497159		TNFAIP3	ENSG00000118503	0.471598	0.361406		LIF	ENSG00000128342	1.38579	0.108029
SYK	ENSG00000165025	0.439482	0.497392		TNFRSF4	ENSG00000186827	0.659649	0.362758		MCAM	NA	-0.849444	0.109902
SELPLG	ENSG00000110876	0.392943	0.498019		CXCR4	ENSG00000121966	0.728352	0.369031		CLU	ENSG00000120885	0.971286	0.110045
CD37	ENSG00000104894	0.448378	0.500595		CXCL11	ENSG00000169248	0.92107	0.371376		NFKB1	ENSG00000109320	0.280797	0.111673
FCGR2A	ENSG00000143226	0.357083	0.502777		IFNG	ENSG00000111537	0.593855	0.371931		PAX5	ENSG00000196092	1.18844	0.11313
KIR_Inhibiting_Subgroup_1	NA	-0.240898	0.503122		CHUK	ENSG00000213341	0.152477	0.376248		HSD11B1	ENSG00000117594	0.509886	0.113331
IFNAR1	ENSG00000142166	-0.101308	0.504556		RIPK2	ENSG00000104312	0.219312	0.376791		XCR1	ENSG00000173578	0.67553	0.115148
BTLA	ENSG00000186265	0.521334	0.505309		MAPK14	ENSG00000112062	-0.0926309	0.377909		IL10RA	ENSG00000110324	0.647594	0.115556
MAPKAPK2	ENSG00000162889	-0.209316	0.507345		IL2RA	ENSG00000134460	0.729878	0.378511		CR1	ENSG00000203710	0.799619	0.115587
IL24	ENSG00000162892	0.480946	0.507758		IRAK4	ENSG00000198001	0.106609	0.381786		NCF4	ENSG00000100365	0.65872	0.117303
IL17RB	ENSG00000056736	0.632643	0.507849		MFGE8	ENSG00000140545	0.246721	0.382041		CAMP	ENSG00000164047	1.31096	0.117544
LBP	ENSG00000129988	0.683278	0.508863		CD180	ENSG00000134061	0.627615	0.384329		BLK	ENSG00000136573	-0.62241	0.119005
KLRG1	ENSG00000139187	-0.659202	0.511033		MS4A1	ENSG00000156738	0.674058	0.385442		GZMA	ENSG00000145649	0.951154	0.120535
CD86	ENSG00000114013	0.464276	0.513386		TANK	ENSG00000136560	0.110681	0.386782		IL11RA	ENSG00000137070	-0.256572	0.121346
C8A	ENSG00000157131	0.653336	0.513959		CXCL1	ENSG00000163739	0.670251	0.387778		ALCAM	ENSG00000170017	0.248316	0.122863
CD99	ENSG00000002586	-0.148033	0.518483		CCL25	ENSG00000131142	0.725304	0.388722		NOD2	ENSG00000167207	0.98938	0.124187
CASP1	ENSG00000137752	0.164138	0.522066		LILRA1	ENSG00000277398	0.504723	0.390745		TNFRSF1B	ENSG00000028137	0.398266	0.12636
NOS2A	NA	-0.818685	0.523354		IL19	ENSG00000142224	-0.319909	0.393762		TRAF3	ENSG00000131323	0.26954	0.128926
IFIT2	ENSG00000119922	-0.448289	0.523428		LCK	ENSG00000182866	0.597525	0.398529		CR2	ENSG00000117322	-0.988876	0.130064
CCR2	ENSG00000121807	0.487954	0.525736		ITGB3	ENSG00000259207	-0.597833	0.399195		NLRC5	ENSG00000140853	0.414147	0.130504
CCL18	ENSG00000278006	0.640233	0.527963		ST6GAL1	ENSG00000073849	0.187897	0.400884		LAMP1	ENSG00000185896	-0.244186	0.131381
MAPK11	ENSG00000185386	0.200677	0.528221		IFIT2	ENSG00000119922	-0.535883	0.401787		SLAMF6	ENSG00000162739	1.07523	0.1325
CTSH	ENSG00000103811	0.215653	0.53596		IL1RAPL2	ENSG00000189108	0.575418	0.401963		IL2RG	ENSG00000147168	1.19794	0.132576
CDK1	ENSG00000170312	0.465271	0.538995		ISG20	ENSG00000172183	0.389068	0.402936		CMKLR1	ENSG00000174600	0.559504	0.134847
CCL1	ENSG00000108702	0.467527	0.539205		CD28	ENSG00000178562	0.562916	0.404281		SELE	ENSG00000007908	1.2363	0.135128
IL25	ENSG00000166090	0.503699	0.541573		CD55	ENSG00000196352	-0.154221	0.406491		CCL4	ENSG00000275302	1.06562	0.135299
IL12RB1	ENSG00000096996	0.448061	0.546494		HLA-C	ENSG00000204525	-0.512029	0.406533		ATF1	ENSG00000123268	0.131873	0.135536
NFATC2	ENSG00000101096	-0.305133	0.546525		ITGB1	ENSG00000150093	-0.203646	0.408189		CCR6	ENSG00000112486	0.634083	0.13691
CFD	ENSG00000197766	0.88567	0.546883		CAMP	ENSG00000164047	0.845504	0.41065		ENG	ENSG00000106991	-0.353683	0.139696
IRAK2	ENSG00000134070	0.412069	0.547881		JAM3	ENSG00000166086	0.121595	0.412087		CCL11	ENSG00000172156	1.1149	0.143188
IL2	ENSG00000109471	0.62873	0.548379		CD5	ENSG00000110448	-0.797524	0.412327		IFNA1	ENSG00000197919	1.06471	0.143759
FOXP3	ENSG00000049768	0.411782	0.551734		IL3RA	ENSG00000185291	-0.797322	0.414118		CD276	ENSG00000103855	-0.304121	0.145735
ST6GAL1	ENSG00000073849	0.149884	0.553259		HCK	ENSG00000101336	-0.377699	0.416433		MAGEA1	ENSG00000198681	1.05404	0.148953
IL12RB2	ENSG00000081985	-0.546736	0.558017		CTSS	ENSG00000163131	0.385218	0.41765		CX3CR1	ENSG00000168329	-0.262517	0.149565
CCL20	ENSG00000115009	0.384897	0.558606		IFI16	ENSG00000163565	0.15421	0.423009		CXCL1	ENSG00000163739	0.940455	0.149981
CD68	ENSG00000129226	0.26054	0.563118		CCR2	ENSG00000121807	0.564602	0.426938		IL12RB1	ENSG00000096996	0.793543	0.150657
CCL19	ENSG00000172724	0.483905	0.563543		IL16	ENSG00000172349	0.378918	0.429094		IFITM1	ENSG00000185885	0.427551	0.153156
SSX1	ENSG00000126752	0.545066	0.564566		CD3EAP	ENSG00000117877	0.24484	0.429526		SELPLG	ENSG00000110876	0.643039	0.15326
CCR7	ENSG00000126353	0.356658	0.564696		MASP1	ENSG00000127241	0.86391	0.430762		IL15RA	ENSG00000134470	0.634557	0.153347
MAPK3	ENSG00000102882	-0.089062	0.567528		NCAM1	ENSG00000149294	-0.18772	0.432615		IL19	ENSG00000142224	-0.449282	0.153959
IGLL1	ENSG00000128322	0.434741	0.570559		HAVCR2	ENSG00000135077	0.300414	0.434876		RRAD	ENSG00000166592	0.959102	0.156128
ATF1	ENSG00000123268	0.0694477	0.57145		GPI	ENSG00000282019	0.143701	0.435311		TICAM1	ENSG00000127666	0.245768	0.156433
ITGA2	ENSG00000164171	-0.338953	0.574165		TLR9	ENSG00000239732	0.198735	0.435329		SSX1	ENSG00000126752	0.980258	0.157573
IL11	ENSG00000095752	0.54644	0.574693		CCL4	ENSG00000275302	0.685508	0.438736		BST2	ENSG00000130303	0.242396	0.158232
AMBP	ENSG00000106927	0.390691	0.575014		NCF4	ENSG00000100365	0.407018	0.440055		PRKCE	ENSG00000171132	-0.283288	0.15856
PSMB10	ENSG00000205220	-0.169576	0.576324		CFP	ENSG00000126759	0.524611	0.446535		SMAD3	ENSG00000166949	-0.10816	0.16028
LIF	ENSG00000128342	-0.678234	0.579649		TNFRSF1A	ENSG00000067182	-0.178049	0.454081		CD163	ENSG00000177575	0.485093	0.16067
CD3G	ENSG00000160654	0.496493	0.581055		CD7	ENSG00000173762	0.512156	0.454231		CCR4	ENSG00000183813	1.20679	0.160804
CEACAM1	ENSG00000079385	0.471927	0.581066		MAP3K7	ENSG00000135341	-0.0631565	0.455854		TBX21	ENSG00000073861	0.643317	0.16193
CCL3L1	ENSG00000277796	0.673942	0.58132		CD53	ENSG00000143119	0.349534	0.459515		CD47	ENSG00000196776	-0.191873	0.163424
CD3E	ENSG00000198851	0.579304	0.585407		TRAF6	ENSG00000175104	0.0891088	0.459515		IRF7	ENSG00000185507	-0.379911	0.16531
BCL2L1	ENSG00000171552	-0.09297	0.586282		TNFRSF11A	ENSG00000141655	-0.819282	0.465382		MAPK8	ENSG00000107643	-0.184658	0.167363
NCR1	ENSG00000275637	-0.443837	0.586307		NFKB2	ENSG00000077150	-0.202867	0.465551		IL11	ENSG00000095752	0.980073	0.167774
CXCL12	ENSG00000107562	-0.308012	0.59071		C4B	ENSG00000228454	-0.4454	0.468071		KIR3DL1	ENSG00000275486	1.05775	0.168426
CXCR5	ENSG00000160683	0.465686	0.591455		RRAD	ENSG00000166592	-0.614352	0.469888		CD53	ENSG00000143119	0.524232	0.169524
FOS	ENSG00000170345	1.14491	0.593024		IL1B	ENSG00000125538	0.719902	0.47074		PSMB7	ENSG00000136930	-0.126505	0.170434
PAX5	ENSG00000196092	0.575023	0.593755		CD47	ENSG00000196776	-0.123908	0.473682		IFNAR1	ENSG00000142166	-0.161735	0.171803
IL2RA	ENSG00000134460	0.527765	0.594178		C1S	ENSG00000182326	-0.180667	0.473903		ITGA5	ENSG00000161638	0.390772	0.172559
CX3CL1	ENSG00000006210	-0.316516	0.595369		C5	ENSG00000106804	0.134951	0.47564		MYD88	ENSG00000172936	0.227964	0.185548
OAS3	ENSG00000111331	-0.377328	0.597213		KLRD1	ENSG00000134539	0.603434	0.476123		IL18R1	ENSG00000115604	0.725561	0.187034
CD58	ENSG00000116815	0.171858	0.597475		BID	ENSG00000015475	0.495435	0.48108		ITGAE	ENSG00000083457	0.177974	0.192284
IL6ST	ENSG00000134352	-0.150633	0.60031		ITGA2	ENSG00000164171	-0.388686	0.485314		FOS	ENSG00000170345	2.02556	0.192429
TICAM1	ENSG00000127666	0.127861	0.603824		IL21R	ENSG00000103522	0.605259	0.485351		TNFRSF14	ENSG00000157873	0.246695	0.195582
IL1RAPL2	ENSG00000189108	0.421888	0.605929		CTLA4	ENSG00000163599	0.705527	0.491348		MAPK11	ENSG00000185386	-0.318106	0.196321
AMICA1	NA	0.289904	0.607442		CD36	ENSG00000135218	0.392876	0.492069		SELL	ENSG00000188404	0.924146	0.197299
F13A1	ENSG00000124491	0.452973	0.621033		SIGIRR	ENSG00000185187	0.299615	0.498249		MX1	ENSG00000157601	-0.449816	0.198727
CTLA4	ENSG00000163599	0.573008	0.622024		CCL23	ENSG00000274736	0.451725	0.503108		HLA-DMA	ENSG00000241394	0.477213	0.199568
LAG3	ENSG00000089692	0.193574	0.623105		ETS1	ENSG00000134954	0.13156	0.503745		CX3CL1	ENSG00000006210	-0.554917	0.200042
CD63	ENSG00000135404	0.127597	0.62378		PSMD7	ENSG00000103035	0.102935	0.512247		ABL1	ENSG00000097007	-0.21461	0.201679
IFNB1	ENSG00000171855	0.565139	0.626626		FCER1G	ENSG00000158869	-0.389797	0.514306		FCGR2A	ENSG00000143226	0.539462	0.201926
IRAK4	ENSG00000198001	-0.0732556	0.626829		SELL	ENSG00000188404	0.589983	0.52152		IFNAR2	ENSG00000159110	-0.243737	0.202069
C3AR1	ENSG00000171860	0.257533	0.628924		PLA2G6	ENSG00000184381	-0.144304	0.521937		CD63	ENSG00000135404	0.233362	0.203664
EPCAM	ENSG00000119888	-0.40103	0.632447		CLEC4A	ENSG00000111729	-0.145129	0.522084		VCAM1	ENSG00000162692	0.618861	0.204643
CASP10	ENSG00000003400	0.185616	0.63282		JAK1	ENSG00000162434	-0.0625611	0.523459		MS4A2	ENSG00000149534	0.947333	0.205446
LILRA5	ENSG00000187116	0.449057	0.634602		FCER1A	ENSG00000179639	-0.791606	0.523855		PIK3CG	ENSG00000105851	0.585195	0.206436
ROPN1	ENSG00000065371	0.329128	0.635633		TNFSF18	ENSG00000120337	0.419239	0.524755		IFNG	ENSG00000111537	0.73633	0.20646
TNFRSF18	ENSG00000186891	0.404831	0.63658		PRKCE	ENSG00000171132	0.167234	0.527494		CD6	ENSG00000013725	0.751057	0.206466
CX3CR1	ENSG00000168329	0.126494	0.640356		ELANE	ENSG00000197561	0.446379	0.530783		CD36	ENSG00000135218	0.579505	0.206658
MAVS	ENSG00000088888	0.0699546	0.640888		TOLLIP	ENSG00000078902	0.0994708	0.533485		CD180	ENSG00000134061	0.772485	0.221739
FCER1G	ENSG00000158869	0.316722	0.641277		CR2	ENSG00000117322	-0.54283	0.537997		BATF	ENSG00000156127	0.745059	0.221757
PIK3CD	ENSG00000171608	-0.0755097	0.642875		TNFRSF8	ENSG00000120949	0.414981	0.539455		CD37	ENSG00000104894	0.652914	0.222247
CSF2RB	ENSG00000100368	0.317071	0.644883		CXCL6	ENSG00000124875	0.633637	0.544223		ABCB1	ENSG00000085563	0.270872	0.223877
CARD11	ENSG00000198286	0.412134	0.649664		ITGA2B	ENSG00000005961	-0.173503	0.548272		TREM2	ENSG00000095970	0.36217	0.224558
MAGEA12	ENSG00000213401	-0.454711	0.651822		CD44	ENSG00000026508	0.235831	0.550287		CCL20	ENSG00000115009	0.61014	0.224932
RIPK2	ENSG00000104312	0.142467	0.654136		CD99	ENSG00000002586	0.140702	0.551348		LY86	ENSG00000112799	0.572627	0.225684
TANK	ENSG00000136560	-0.0728714	0.65461		LILRB1	ENSG00000277807	-0.639372	0.551554		IRF5	ENSG00000128604	0.861198	0.226328
CR2	ENSG00000117322	-0.446046	0.655039		CTSH	ENSG00000103811	0.210157	0.552507		GPI	ENSG00000282019	0.188842	0.226503
EGR1	ENSG00000120738	0.762857	0.656025		PAX5	ENSG00000196092	0.613413	0.553787		CCL23	ENSG00000274736	0.655445	0.226796
ICAM4	ENSG00000105371	0.492818	0.657528		JAK3	ENSG00000105639	-0.112523	0.554384		TRAF6	ENSG00000175104	0.120824	0.228878
MAP3K1	ENSG00000095015	0.0932865	0.659336		FEZ1	ENSG00000149557	-0.154822	0.555745		TLR1	ENSG00000174125	-0.181837	0.231778
IL27	ENSG00000197272	0.460935	0.661394		CD40LG	ENSG00000102245	0.398572	0.557647		ATG12	ENSG00000145782	0.32539	0.236819
C1S	ENSG00000182326	0.133113	0.661792		NFKB1	ENSG00000109320	-0.142329	0.563129		CREB1	ENSG00000118260	-0.0928543	0.239028
KLRC1	ENSG00000134545	0.358884	0.6633		C2	ENSG00000231543	0.470308	0.564662		CXCL6	ENSG00000124875	0.959659	0.239368
IL17RA	ENSG00000177663	0.0705599	0.664064		SIGLEC1	ENSG00000088827	0.482427	0.569858		UBC	ENSG00000150991	-0.329698	0.241488
INPP5D	ENSG00000168918	0.207115	0.664924		IFNGR1	ENSG00000027697	0.104041	0.573185		FADD	ENSG00000168040	0.232942	0.242291
IL9	ENSG00000145839	0.225395	0.666035		LILRA4	ENSG00000239961	0.440872	0.573226		CD68	ENSG00000129226	0.404503	0.242544
CEACAM8	ENSG00000124469	0.447528	0.667586		IRF8	ENSG00000140968	-0.32227	0.574829		IFI35	ENSG00000068079	-0.428935	0.248604
CD3D	ENSG00000167286	0.351277	0.670811		IFITM2	ENSG00000185201	0.199178	0.57636		TNFRSF12A	ENSG00000006327	0.64577	0.248756
RUNX1	ENSG00000159216	-0.41476	0.673442		TXK	ENSG00000074966	0.447595	0.580256		FCER1A	ENSG00000179639	-1.14463	0.248884
CD209	ENSG00000090659	0.364927	0.673748		FCGR1A	ENSG00000150337	0.50552	0.583396		C1QBP	ENSG00000108561	0.147522	0.254109
PTPRC	ENSG00000081237	0.334968	0.678358		LCP1	ENSG00000136167	0.329036	0.585323		LCP1	ENSG00000136167	0.518897	0.255593
C1QBP	ENSG00000108561	-0.0790691	0.67874		DPP4	ENSG00000197635	-0.653089	0.591102		CD40LG	ENSG00000102245	0.600938	0.255807
IFNA8	ENSG00000120242	0.5898	0.681728		MAP2K2	ENSG00000126934	-0.0992002	0.592627		SYK	ENSG00000165025	0.602466	0.257533
CCND3	ENSG00000112576	0.107049	0.685175		IL6ST	ENSG00000134352	0.1502	0.602025		IL16	ENSG00000172349	0.468705	0.259378
IRF3	ENSG00000126456	-0.106036	0.685831		HLA-DRB4	ENSG00000227357	-1.64562	0.608537		SEMG1	ENSG00000124233	0.788191	0.260718
ABCB1	ENSG00000085563	-0.135942	0.68796		LTB	ENSG00000204487	0.447735	0.609536		TNFRSF1A	ENSG00000067182	-0.225684	0.267062
CCL2	ENSG00000108691	-0.483592	0.690411		KIR_Activating_Subgroup_1	NA	0.340628	0.610253		C3	ENSG00000125730	-1.05506	0.267661
MAF	ENSG00000178573	0.13815	0.695045		FCGR3A	ENSG00000203747	0.278615	0.611408		ITGB3	ENSG00000259207	-0.697973	0.269121
CD163	ENSG00000177575	-0.215029	0.695444		TNFRSF9	ENSG00000049249	0.441902	0.612327		ITGA6	ENSG00000091409	-0.434592	0.27576
NT5E	ENSG00000135318	0.137096	0.696201		IL7	ENSG00000104432	0.408042	0.620016		MAVS	ENSG00000088888	0.117388	0.277359
S100A12	ENSG00000163221	0.482609	0.699095		SPP1	ENSG00000118785	0.508756	0.627541		ITGB1	ENSG00000150093	-0.236845	0.280215
CXCL2	ENSG00000081041	0.776307	0.703507		SLAMF7	ENSG00000026751	0.581208	0.628282		ELANE	ENSG00000197561	0.61812	0.284281
POU2F2	ENSG00000028277	-0.261109	0.703554		TRAF2	ENSG00000127191	0.0986661	0.630116		MPPED1	ENSG00000186732	0.657097	0.288065
TAP2	ENSG00000223481	-0.121929	0.704575		LY86	ENSG00000112799	0.320542	0.631003		CD40	ENSG00000101017	0.222628	0.28987
SYCP1	ENSG00000198765	0.398339	0.706895		ATF1	ENSG00000123268	0.0624253	0.634627		CD2	ENSG00000116824	-0.379302	0.290816
IL7R	ENSG00000168685	0.373952	0.70822		TMEFF2	ENSG00000144339	-0.540646	0.638543		S100A7	ENSG00000143556	0.805083	0.295593
MFGE8	ENSG00000140545	0.144491	0.710803		TLR3	ENSG00000164342	-0.1627	0.639165		INPP5D	ENSG00000168918	0.351598	0.299259
IL3	ENSG00000164399	0.36686	0.71157		CD46	ENSG00000117335	-0.0700404	0.644253		IFNL1	ENSG00000182393	-0.831313	0.299407
CCL3	ENSG00000278567	0.439762	0.712619		IFITM1	ENSG00000185885	-0.204314	0.648773		S100A8	ENSG00000143546	1.20143	0.299426
TNFSF13B	ENSG00000102524	-0.463394	0.71407		TICAM1	ENSG00000127666	0.117907	0.650052		ITGA1	ENSG00000213949	-0.377643	0.299586
TXNIP	ENSG00000265972	0.294371	0.714348		NFATC3	ENSG00000072736	-0.0527523	0.651952		CXCR5	ENSG00000160683	0.693461	0.300428
TAP1	ENSG00000224212	0.20742	0.714552		C8B	ENSG00000021852	0.406638	0.653304		IFI27	ENSG00000275214	-0.507756	0.302897
S100A7	ENSG00000143556	0.424029	0.718084		TNF	ENSG00000204490	0.601667	0.656087		CCL7	ENSG00000108688	-0.411452	0.306423
IGF2R	ENSG00000197081	0.082149	0.721488		ANP32B	ENSG00000136938	-0.0597146	0.656143		C3AR1	ENSG00000171860	0.404205	0.308091
IFNA17	ENSG00000234829	0.43897	0.721827		MCAM	NA	-0.362441	0.661113		SPINK5	ENSG00000133710	0.876484	0.314006
NCF4	ENSG00000100365	0.251702	0.72431		GZMH	ENSG00000100450	0.338349	0.663516		RELB	ENSG00000104856	0.391715	0.314061
SPN	ENSG00000197471	0.412573	0.724561		MUC1	ENSG00000185499	-0.47928	0.666041		MICB	ENSG00000204516	0.693038	0.315529
CXCL14	ENSG00000145824	0.64062	0.726043		LTA	ENSG00000238130	0.319137	0.6712		GTF3C1	ENSG00000077235	-0.102066	0.316935
CD274	ENSG00000120217	0.202153	0.726756		CD97	NA	0.237706	0.67162		ZNF205	ENSG00000122386	-0.307025	0.319344
CCL27	ENSG00000213927	-0.334791	0.727818		TAP1	ENSG00000224212	-0.2258	0.672343		MAGEA12	ENSG00000213401	0.729721	0.321005
CD74	ENSG00000019582	-0.217061	0.728534		EWSR1	ENSG00000182944	-0.0848742	0.678323		EGR1	ENSG00000120738	1.23133	0.322356
ICOS	ENSG00000163600	0.504017	0.7297		ICAM2	ENSG00000108622	-0.20989	0.683365		IRF2	ENSG00000168310	0.167281	0.322366
CTAG1B	ENSG00000184033	0.368473	0.732837		KLRG1	ENSG00000139187	0.486485	0.689612		PIN1	ENSG00000127445	-0.155168	0.325871
CLEC5A	ENSG00000258227	0.425775	0.735852		SSX1	ENSG00000126752	0.435192	0.691778		HLA-DPA1	ENSG00000231389	0.422188	0.326928
CD70	NA	0.437254	0.739727		SPA17	ENSG00000064199	-0.363345	0.694719		LBP	ENSG00000129988	0.851874	0.333059
ICOSLG	ENSG00000160223	0.30645	0.743066		IL12RB1	ENSG00000096996	0.345482	0.69492		FCGR3A	ENSG00000203747	0.405466	0.339199
IL22RA2	ENSG00000164485	0.478121	0.74504		VEGFC	ENSG00000150630	0.164276	0.695804		CCL27	ENSG00000213927	0.605814	0.34304
LY86	ENSG00000112799	0.252085	0.750165		TNFSF13B	ENSG00000102524	0.4776	0.699535		PRM1	ENSG00000175646	0.656538	0.351695
CD160	ENSG00000117281	0.400278	0.752759		IL11	ENSG00000095752	0.433632	0.702818		MASP1	ENSG00000127241	0.934046	0.352281
SH2D1B	ENSG00000198574	0.381445	0.754736		BCL6	ENSG00000113916	0.115852	0.704561		ATF2	ENSG00000115966	0.0613212	0.353061
CAMP	ENSG00000164047	0.465451	0.756666		CASP1	ENSG00000137752	-0.118667	0.707939		IL17RB	ENSG00000056736	0.763202	0.354837
C6	ENSG00000039537	0.296514	0.757329		ITGAM	ENSG00000169896	0.184022	0.711095		IKBKB	ENSG00000104365	-0.234535	0.357512
CD27	ENSG00000139193	0.400255	0.761772		RORA	ENSG00000069667	-0.135601	0.71225		KLRD1	ENSG00000134539	-0.690321	0.358925
FADD	ENSG00000168040	-0.10176	0.764303		MSR1	ENSG00000038945	0.218117	0.717139		PSMB9	ENSG00000240118	0.187682	0.363043
SERPING1	ENSG00000149131	-0.0970171	0.767284		IL13RA2	ENSG00000123496	0.450822	0.717222		C4B	ENSG00000228454	-0.494789	0.371153
CCL4	ENSG00000275302	0.380117	0.77014		HLA-DPB1	ENSG00000223865	0.212343	0.719392		SLAMF1	ENSG00000117090	0.592598	0.374361
ENTPD1	ENSG00000138185	0.269969	0.770619		CD63	ENSG00000135404	0.105765	0.721204		IL32	ENSG00000008517	-0.570645	0.374698
SIGLEC1	ENSG00000088827	-0.324897	0.771594		STAT4	ENSG00000138378	0.328597	0.723384		DOCK9	ENSG00000088387	-0.194348	0.384015
RELB	ENSG00000104856	-0.186247	0.773635		BST1	ENSG00000109743	-0.103291	0.724366		LY96	ENSG00000154589	-0.168275	0.385138
STAT6	ENSG00000166888	0.0645606	0.773994		TLR1	ENSG00000174125	0.0849926	0.728124		CD5	ENSG00000110448	-0.793224	0.392025
IL1RAP	ENSG00000196083	0.10348	0.775285		S100A8	ENSG00000143546	-0.622302	0.728385		IL17A	ENSG00000112115	-0.262965	0.392957
CD79B	ENSG00000007312	-0.27759	0.781252		FOS	ENSG00000170345	0.88065	0.731474		CMA1	ENSG00000092009	-0.269734	0.394827
C1R	ENSG00000159403	-0.141306	0.783524		PLAU	ENSG00000122861	0.250595	0.731719		SPANXB1	ENSG00000227234	0.8114	0.397263
MBL2	ENSG00000165471	0.248975	0.785556		PRG2	ENSG00000186652	0.334716	0.735889		TXNIP	ENSG00000265972	0.478093	0.398148
PRAME	ENSG00000185686	0.247971	0.785825		CLEC6A	ENSG00000205846	0.352085	0.737008		VEGFC	ENSG00000150630	-0.256706	0.398304
CCR5	ENSG00000160791	0.400295	0.787819		ALCAM	ENSG00000170017	0.0930075	0.738771		HRAS	ENSG00000174775	-0.177838	0.399395
IL1R1	ENSG00000115594	0.28102	0.789118		STAT3	ENSG00000168610	0.0986559	0.739532		CD1D	ENSG00000158473	-0.553463	0.402723
ICAM3	ENSG00000076662	0.13283	0.789455		CCL15	ENSG00000275718	0.350952	0.741727		CTAG1B	ENSG00000184033	0.617865	0.403912
TLR7	ENSG00000196664	0.189586	0.789551		CLEC7A	ENSG00000172243	0.409601	0.742239		MBL2	ENSG00000165471	0.473947	0.40497
FLT3LG	ENSG00000090554	-0.0518673	0.789829		CX3CL1	ENSG00000006210	-0.238402	0.742489		GZMH	ENSG00000100450	0.483334	0.417071
CLEC4A	ENSG00000111729	0.0857292	0.792953		REPS1	ENSG00000135597	0.039016	0.744013		MAP3K1	ENSG00000095015	0.132037	0.418048
IL12A	ENSG00000168811	-0.364247	0.793507		RUNX3	ENSG00000020633	0.329212	0.7451		NOS2A	NA	-0.919841	0.420861
CD47	ENSG00000196776	-0.0679654	0.793573		CD22	ENSG00000012124	-0.10768	0.747249		NFATC2	ENSG00000101096	-0.352787	0.425859
DUSP6	ENSG00000139318	-0.331053	0.79478		CD74	ENSG00000019582	0.207719	0.747921		SMAD2	ENSG00000175387	0.0970673	0.428489
SERPINB2	ENSG00000197632	-0.175653	0.797222		SELPLG	ENSG00000110876	0.250096	0.749211		CKLF	ENSG00000217555	0.0713365	0.442786
CD8B	ENSG00000172116	0.257697	0.797275		RELA	ENSG00000173039	-0.0714621	0.751229		AMICA1	NA	0.361109	0.442827
RELA	ENSG00000173039	0.0633836	0.797905		TNFSF15	ENSG00000181634	0.382379	0.751298		THBD	ENSG00000178726	-0.418633	0.447556
TNFSF8	ENSG00000106952	0.203964	0.802428		CCL8	ENSG00000108700	0.403084	0.753705		CCL5	ENSG00000271503	0.727586	0.449751
IL17A	ENSG00000112115	-0.129373	0.803026		NOTCH1	ENSG00000148400	-0.15419	0.756216		TIRAP	ENSG00000150455	-0.113049	0.462514
FCGR2B	ENSG00000072694	0.330863	0.804881		CFI	ENSG00000205403	-0.177989	0.756477		IL3RA	ENSG00000185291	-0.713034	0.46747
SPO11	ENSG00000054796	0.318974	0.80526		MAP4K2	ENSG00000168067	0.106785	0.757394		PIK3CD	ENSG00000171608	-0.0961859	0.469957
CCL24	ENSG00000106178	-0.129373	0.805477		ANXA1	ENSG00000135046	0.138952	0.757748		HLA-DPB1	ENSG00000223865	0.313942	0.470602
CCL28	ENSG00000151882	-0.129373	0.805477		CCND3	ENSG00000112576	-0.0900625	0.763992		MAPK14	ENSG00000112062	0.0781278	0.472025
CD1B	ENSG00000158485	-0.129373	0.805477		TRAF3	ENSG00000131323	0.0963421	0.764017		STAT4	ENSG00000138378	0.486716	0.475214
TNFRSF13B	ENSG00000240505	-0.129373	0.805477		S100A7	ENSG00000143556	0.381054	0.764635		CCR5	ENSG00000160791	0.691266	0.476419
USP9Y	ENSG00000114374	-0.129373	0.805477		IL1RL2	ENSG00000115598	-0.41447	0.767719		TLR8	ENSG00000101916	0.506692	0.480789
SELL	ENSG00000188404	0.334163	0.807458		ENG	ENSG00000106991	-0.127738	0.768754		PASD1	ENSG00000166049	0.421729	0.481521
RPS6	ENSG00000137154	-0.095494	0.809597		IL17RA	ENSG00000177663	-0.0560443	0.770769		C4BPA	ENSG00000123838	-0.620954	0.48815
CD24	ENSG00000272398	0.306585	0.80967		IL6	ENSG00000136244	0.510282	0.772738		RORC	ENSG00000143365	0.83421	0.493884
TNFSF12	ENSG00000239697	0.0638017	0.811346		CD200	ENSG00000091972	0.157812	0.773009		MST1R	ENSG00000164078	0.286299	0.511917
SYT17	ENSG00000103528	0.388887	0.811498		TLR8	ENSG00000101916	-0.304446	0.77626		TRAF2	ENSG00000127191	-0.114786	0.515572
BIRC5	ENSG00000089685	0.433558	0.812539		CARD9	ENSG00000187796	0.176051	0.777881		EPCAM	ENSG00000119888	-0.467066	0.517553
CMA1	ENSG00000092009	-0.129373	0.8126		IFNAR1	ENSG00000142166	-0.0604274	0.779425		TNFSF14	ENSG00000125735	-0.799951	0.521848
CCRL2	ENSG00000121797	0.349812	0.818328		C4BPA	ENSG00000123838	-0.371573	0.782014		LILRB3	ENSG00000204577	0.311673	0.523094
CD53	ENSG00000143119	0.174698	0.818378		CMA1	ENSG00000092009	-0.140361	0.783656		IL6	ENSG00000136244	0.787271	0.525261
IL5RA	ENSG00000091181	0.260819	0.818536		IFNA2	ENSG00000188379	0.400796	0.783884		BAX	ENSG00000087088	0.147215	0.527073
CD59	ENSG00000085063	-0.0725053	0.819757		PECAM1	ENSG00000261371	-0.17134	0.784481		TLR3	ENSG00000164342	-0.188989	0.527123
CD247	ENSG00000198821	0.309091	0.820955		LY96	ENSG00000154589	0.0847451	0.790671		HLA-DMB	ENSG00000226264	0.289591	0.5301
MRC1	ENSG00000260314	0.190176	0.82203		KIR_Inhibiting_Subgroup_1	NA	0.138956	0.791164		CD97	NA	-0.291259	0.531412
HLA-G	ENSG00000233095	-0.121981	0.822267		IL17A	ENSG00000112115	-0.133592	0.791576		CD44	ENSG00000026508	0.2339	0.533404
IL1RL2	ENSG00000115598	0.354763	0.823331		HLA-DRA	ENSG00000230726	0.227121	0.803755		SBNO2	ENSG00000064932	0.137752	0.540281
NUP107	ENSG00000111581	0.0365017	0.824628		CD14	ENSG00000170458	-0.196532	0.804367		TNFRSF8	ENSG00000120949	0.395824	0.547645
CD84	ENSG00000066294	0.170172	0.826344		CYLD	ENSG00000083799	0.045529	0.804733		EGR2	ENSG00000122877	0.888196	0.549075
SPACA3	ENSG00000141316	0.302855	0.828587		TGFB2	ENSG00000092969	0.161311	0.807638		MAP2K2	ENSG00000126934	-0.102787	0.549174
ITGA5	ENSG00000161638	-0.125584	0.831502		CLU	ENSG00000120885	0.293379	0.810939		EBI3	ENSG00000105246	0.598749	0.550557
HRAS	ENSG00000174775	0.0808118	0.831868		MAVS	ENSG00000088888	0.0474339	0.812848		RAG1	ENSG00000166349	0.26544	0.552073
IFNL1	ENSG00000182393	0.3258	0.832956		CCL20	ENSG00000115009	0.225243	0.815817		ENTPD1	ENSG00000138185	0.392778	0.559481
PPBP	ENSG00000163736	0.313678	0.833486		TAPBP	ENSG00000206208	0.0659805	0.816658		ATG7	ENSG00000197548	-0.054461	0.560436
LCP1	ENSG00000136167	0.189861	0.833779		KIT	ENSG00000157404	0.141485	0.8171		CXCL11	ENSG00000169248	0.658556	0.573762
CCR6	ENSG00000112486	-0.186865	0.837023		IFNAR2	ENSG00000159110	0.0860884	0.81797		TNFSF12	ENSG00000239697	-0.101035	0.576161
EOMES	ENSG00000163508	0.316186	0.837173		INPP5D	ENSG00000168918	0.144483	0.818045		MAP3K7	ENSG00000135341	-0.0507098	0.57716
PDCD1	ENSG00000276977	0.255821	0.839841		CD40	ENSG00000101017	-0.0900266	0.818746		TNFRSF11B	ENSG00000164761	0.613887	0.582901
FEZ1	ENSG00000149557	0.0833697	0.840124		STAT1	ENSG00000115415	-0.159749	0.819618		REPS1	ENSG00000135597	0.0510091	0.585936
PYCARD	ENSG00000103490	-0.107918	0.842053		ITCH	ENSG00000078747	0.038412	0.820158		TBK1	ENSG00000183735	0.108533	0.586006
SPA17	ENSG00000064199	0.247951	0.842476		MBL2	ENSG00000165471	0.224973	0.820748		SYT17	ENSG00000103528	0.599927	0.592403
MAGEC2	ENSG00000046774	0.29413	0.84661		PDGFRB	ENSG00000113721	-0.0621412	0.825407		CTSS	ENSG00000163131	0.282448	0.598776
ITGAE	ENSG00000083457	-0.0561527	0.846983		DMBT1	ENSG00000187908	-0.394406	0.826921		ICAM3	ENSG00000076662	-0.18917	0.60274
CXCL6	ENSG00000124875	0.326021	0.847903		OSM	ENSG00000099985	0.206018	0.828966		ICAM2	ENSG00000108622	-0.233779	0.604883
CD36	ENSG00000135218	0.186629	0.848044		CD81	ENSG00000110651	-0.0484588	0.830505		PSMD7	ENSG00000103035	0.0855451	0.606778
JAM3	ENSG00000166086	-0.0512525	0.848902		FLT3LG	ENSG00000090554	0.04585	0.831203		ADORA2A	ENSG00000128271	0.267072	0.618794
CXCL1	ENSG00000163739	0.270204	0.851559		IRF1	ENSG00000125347	0.219419	0.831263		KIR_Inhibiting_Subgroup_2	NA	-0.198891	0.620342
PVR	ENSG00000073008	-0.0781955	0.852842		FCGR2A	ENSG00000143226	0.182379	0.831651		LILRB2	ENSG00000131042	0.365393	0.625254
IL19	ENSG00000142224	-0.129373	0.853027		CR1	ENSG00000203710	0.22683	0.834839		STAT6	ENSG00000166888	0.0846595	0.627107
CD48	ENSG00000117091	-0.267812	0.8539		CD68	ENSG00000129226	0.143963	0.83599		NCAM1	ENSG00000149294	0.133962	0.627177
EP300	ENSG00000100393	0.0256437	0.854504		CDH5	ENSG00000179776	0.0987245	0.836328		CD209	ENSG00000090659	0.38198	0.630092
SELE	ENSG00000007908	-0.34073	0.854779		IFNA1	ENSG00000197919	0.303616	0.85028		CCL24	ENSG00000106178	-0.18335	0.631651
CXCR6	ENSG00000172215	0.21208	0.855428		EGR2	ENSG00000122877	0.471968	0.850613		CCL28	ENSG00000151882	-0.18335	0.631651
CTSL	ENSG00000135047	0.067344	0.855549		EGR1	ENSG00000120738	0.468471	0.851088		CD1B	ENSG00000158485	-0.18335	0.631651
CD40LG	ENSG00000102245	0.202366	0.857177		EBI3	ENSG00000105246	0.314535	0.854334		TNFRSF13B	ENSG00000240505	-0.18335	0.631651
CMKLR1	ENSG00000174600	0.152359	0.857795		CASP3	ENSG00000164305	-0.0402416	0.85489		USP9Y	ENSG00000114374	-0.18335	0.631651
MAGEB2	ENSG00000099399	0.260698	0.859295		C3AR1	ENSG00000171860	0.146672	0.858146		POU2F2	ENSG00000028277	-0.285426	0.639021
THY1	ENSG00000154096	-0.297258	0.860055		MAPK3	ENSG00000102882	0.0457503	0.858239		NOD1	ENSG00000106100	0.088956	0.640944
TNFSF4	ENSG00000117586	-0.0835407	0.860073		PLA2G1B	ENSG00000170890	0.290696	0.858946		CDK1	ENSG00000170312	-0.375286	0.647182
CSF3	ENSG00000108342	0.258576	0.862995		BIRC5	ENSG00000089685	-0.370443	0.858981		IFNGR1	ENSG00000027697	0.0881583	0.649818
NFATC1	ENSG00000131196	-0.110936	0.863147		CTAGE1	ENSG00000212710	0.236661	0.861519		IRF3	ENSG00000126456	0.109109	0.65268
MME	ENSG00000196549	0.277843	0.86547		CD37	ENSG00000104894	0.204536	0.862168		DMBT1	ENSG00000187908	-0.569694	0.657327
TNFRSF11A	ENSG00000141655	0.350002	0.865555		PSMB10	ENSG00000205220	0.0867061	0.863061		CD59	ENSG00000085063	0.0998638	0.6706
PIK3CG	ENSG00000105851	-0.176061	0.865787		IL10RA	ENSG00000110324	0.164866	0.864428		PYCARD	ENSG00000103490	-0.159256	0.672825
CCL23	ENSG00000274736	0.20372	0.865975		CTAG1B	ENSG00000184033	0.249391	0.866159		TAP2	ENSG00000223481	-0.12524	0.67377
IFI35	ENSG00000068079	0.135537	0.870346		F13A1	ENSG00000124491	-0.245799	0.866899		IGF1R	ENSG00000140443	-0.129286	0.674149
HLA-DRB4	ENSG00000227357	0.859768	0.870886		CCL14	ENSG00000276409	0.146819	0.867078		CXCL16	ENSG00000161921	-0.201029	0.686932
CCL16	ENSG00000275152	0.274481	0.871109		VEGFA	ENSG00000112715	0.11028	0.867709		CFB	ENSG00000241534	-0.473282	0.690864
GAGE1	ENSG00000205777	0.276549	0.873236		HLA-DMB	ENSG00000226264	-0.13767	0.871498		MRC1	ENSG00000260314	0.247426	0.702984
FCER1A	ENSG00000179639	-0.353023	0.876144		ITGB2	ENSG00000160255	0.183774	0.872808		MIF	ENSG00000240972	0.161155	0.706754
IL23A	ENSG00000110944	-0.236095	0.87752		TXNIP	ENSG00000265972	0.183721	0.875915		CYFIP2	ENSG00000055163	0.159645	0.716266
EBI3	ENSG00000105246	0.284214	0.879199		TNFRSF11B	ENSG00000164761	-0.31119	0.87604		LAMP2	ENSG00000005893	-0.100749	0.717441
EGR2	ENSG00000122877	0.416228	0.881543		PTPRC	ENSG00000081237	-0.192868	0.877683		C6	ENSG00000039537	-0.313165	0.718033
ITGB2	ENSG00000160255	-0.173904	0.885225		CXCR5	ENSG00000160683	0.227775	0.879523		IL1R1	ENSG00000115594	-0.320941	0.719414
CHIT1	ENSG00000133063	0.246881	0.887046		CCR5	ENSG00000160791	0.29097	0.880932		JAM3	ENSG00000166086	0.0703428	0.720591
KIR3DL2	ENSG00000275083	0.268964	0.88764		TP53	ENSG00000141510	-0.0568572	0.883387		BCL2L1	ENSG00000171552	0.0698713	0.721236
TLR10	ENSG00000174123	0.236575	0.88837		CD33	ENSG00000105383	-0.282085	0.8842		DUSP6	ENSG00000139318	-0.379522	0.724829
LILRB1	ENSG00000277807	0.279831	0.889609		PSMB8	ENSG00000230034	-0.0506287	0.884729		PLAUR	ENSG00000011422	0.234186	0.742712
CD34	ENSG00000174059	-0.177344	0.891449		CXCL3	ENSG00000163734	0.33232	0.889305		IL12A	ENSG00000168811	-0.39777	0.744892
CXCL9	ENSG00000138755	-0.250776	0.892211		NRP1	ENSG00000099250	0.0872927	0.889839		CCR7	ENSG00000126353	0.241952	0.751126
SEMG1	ENSG00000124233	-0.229593	0.892407		LAIR2	ENSG00000275819	0.122424	0.890269		HCK	ENSG00000101336	0.204649	0.752345
XCL2	ENSG00000143185	0.240985	0.892499		CD1D	ENSG00000158473	0.198214	0.892536		FCGR2B	ENSG00000072694	0.365158	0.754066
CCL5	ENSG00000271503	-0.277019	0.893846		REL	ENSG00000162924	0.158231	0.894049		TNFRSF11A	ENSG00000141655	-0.46928	0.75872
TXK	ENSG00000074966	-0.200845	0.893871		CCR4	ENSG00000183813	0.294868	0.894209		NCR1	ENSG00000275637	-0.306149	0.7588
C4BPA	ENSG00000123838	-0.249381	0.894432		MAGEA4	ENSG00000147381	0.246615	0.894292		LILRA4	ENSG00000239961	0.297483	0.75909
PECAM1	ENSG00000261371	0.114125	0.897201		CCL2	ENSG00000108691	0.262439	0.895247		PPBP	ENSG00000163736	0.370927	0.76219
SLAMF1	ENSG00000117090	-0.198221	0.897985		IL22RA2	ENSG00000164485	-0.287117	0.89833		EP300	ENSG00000100393	0.0316493	0.774722
CDH5	ENSG00000179776	-0.0762675	0.89845		TFRC	ENSG00000072274	-0.182195	0.899009		ATG5	ENSG00000057663	-0.0641971	0.776959
TBX21	ENSG00000073861	-0.153932	0.898696		SERPINB2	ENSG00000197632	0.118502	0.901375		HLA-E	ENSG00000236632	0.116831	0.779128
BCL6	ENSG00000113916	-0.0632634	0.899591		IRAK1	ENSG00000184216	0.0762961	0.902555		IRF1	ENSG00000125347	-0.24562	0.780921
FCGR3A	ENSG00000203747	0.126851	0.901085		NFATC1	ENSG00000131196	0.0924673	0.902583		IRF8	ENSG00000140968	0.205485	0.782504
LTF	ENSG00000012223	0.23364	0.901094		LAMP1	ENSG00000185896	0.0537641	0.903019		NT5E	ENSG00000135318	0.108013	0.78474
SBNO2	ENSG00000064932	-0.0577421	0.901395		SYK	ENSG00000165025	0.162983	0.905538		NFKB2	ENSG00000077150	0.108756	0.784898
TRAF6	ENSG00000175104	0.0317147	0.902868		F12	ENSG00000131187	0.26268	0.908825		MME	ENSG00000196549	0.343013	0.79074
IL4	ENSG00000113520	0.258172	0.906231		SLC11A1	ENSG00000018280	-0.186624	0.910426		HLA-DRB3	ENSG00000196101	0.20123	0.792525
CD1A	ENSG00000158477	0.212668	0.907537		KIR_Inhibiting_Subgroup_2	NA	0.0887223	0.913417		PLAU	ENSG00000122861	0.207898	0.793456
ELANE	ENSG00000197561	0.171741	0.907979		MYD88	ENSG00000172936	-0.0512919	0.916838		KIT	ENSG00000157404	-0.145837	0.794855
TFE3	ENSG00000068323	0.0281188	0.908297		NUP107	ENSG00000111581	-0.0243229	0.917489		BLNK	ENSG00000095585	0.35044	0.795105
BLK	ENSG00000136573	-0.129373	0.908557		CXCL12	ENSG00000107562	0.122442	0.918323		TAPBP	ENSG00000206208	-0.0678296	0.795324
IL15RA	ENSG00000134470	0.137516	0.913398		CTSL	ENSG00000135047	-0.0474303	0.925227		MAPK1	ENSG00000100030	-0.0743307	0.795347
GPI	ENSG00000282019	0.0451403	0.918087		HLA-DPA1	ENSG00000231389	-0.1106	0.927014		SPN	ENSG00000197471	0.32637	0.804725
IL1RL1	ENSG00000115602	-0.180176	0.918919		CXCR1	ENSG00000163464	0.121623	0.927487		CD14	ENSG00000170458	0.18852	0.80682
CXCL11	ENSG00000169248	-0.262515	0.918949		IL9	ENSG00000145839	-0.0958012	0.927971		CXCL12	ENSG00000107562	-0.18557	0.811964
SLAMF6	ENSG00000162739	0.215604	0.919158		MAP3K1	ENSG00000095015	0.0387509	0.929392		LILRB1	ENSG00000277807	-0.359541	0.813912
ICAM1	ENSG00000090339	0.148815	0.91922		IL18R1	ENSG00000115604	-0.148855	0.93065		CD33	ENSG00000105383	-0.348635	0.818259
AKT3	ENSG00000117020	0.0357035	0.919559		NOD2	ENSG00000167207	0.179617	0.930888		HLA-DRA	ENSG00000230726	0.209078	0.819904
TLR6	ENSG00000174130	0.102348	0.921014		CCRL2	ENSG00000121797	-0.20806	0.931067		FCER2	ENSG00000104921	0.175026	0.828531
GZMA	ENSG00000145649	-0.183502	0.921159		ITGA6	ENSG00000091409	-0.100312	0.933838		CYBB	ENSG00000165168	0.159412	0.831824
AXL	ENSG00000167601	0.060007	0.921445		DDX58	ENSG00000107201	0.0603319	0.93553		TXK	ENSG00000074966	0.24675	0.834634
S100B	ENSG00000160307	0.230407	0.924614		STAT5B	ENSG00000173757	0.0329943	0.936892		HLA-G	ENSG00000233095	-0.112702	0.835986
AICDA	ENSG00000111732	0.088205	0.92477		CD84	ENSG00000066294	-0.0978073	0.938523		TLR2	ENSG00000137462	0.120704	0.840282
IL6	ENSG00000136244	0.276989	0.926154		TNFRSF12A	ENSG00000006327	-0.137213	0.938925		S100B	ENSG00000160307	0.332219	0.840558
GZMH	ENSG00000100450	0.144985	0.926171		SYT17	ENSG00000103528	0.21104	0.939879		AKT3	ENSG00000117020	0.0477918	0.851865
HLA-DPB1	ENSG00000223865	0.101599	0.926409		CCR7	ENSG00000126353	-0.114706	0.941038		TNFSF11	ENSG00000120659	-0.244199	0.856056
ATG12	ENSG00000145782	-0.0747054	0.926513		PSMB7	ENSG00000136930	-0.0227455	0.943082		CD96	ENSG00000153283	0.339623	0.860973
ISG15	ENSG00000187608	-0.190691	0.926774		IL32	ENSG00000008517	0.139572	0.943997		A2M	ENSG00000175899	0.0976862	0.861108
STAT4	ENSG00000138378	0.15812	0.926821		CLEC5A	ENSG00000258227	-0.181244	0.945218		MAPK3	ENSG00000102882	-0.0433116	0.863428
TICAM2	ENSG00000243414	0.0657297	0.928716		ENTPD1	ENSG00000138185	0.122809	0.946935		IL9	ENSG00000145839	0.129594	0.864159
TNFSF11	ENSG00000120659	-0.173619	0.928997		CDH1	ENSG00000039068	0.108545	0.947097		PSMB10	ENSG00000205220	-0.0828694	0.86575
F2RL1	ENSG00000164251	0.232788	0.93375		FCER2	ENSG00000104921	0.096811	0.947334		TMEFF2	ENSG00000144339	0.293217	0.866126
KLRC2	ENSG00000205809	-0.216918	0.934489		NCR1	ENSG00000275637	0.137688	0.948624		FEZ1	ENSG00000149557	-0.0714528	0.871641
THBS1	ENSG00000137801	-0.169143	0.936269		FLT3	ENSG00000122025	0.15903	0.95004		LGALS3	ENSG00000131981	-0.0440798	0.872255
CTSS	ENSG00000163131	-0.102771	0.93713		CD164	ENSG00000135535	-0.0250968	0.950557		TNFSF18	ENSG00000120337	-0.18335	0.872976
KIR3DL1	ENSG00000275486	0.197803	0.938155		PNMA1	ENSG00000176903	-0.0358636	0.952304		KIR_Inhibiting_Subgroup_1	NA	-0.101942	0.873015
MAP2K4	ENSG00000065559	0.0231803	0.93822		ARG2	ENSG00000081181	0.212342	0.952554		MAP4K2	ENSG00000168067	-0.0716815	0.873545
LILRA4	ENSG00000239961	-0.143389	0.941321		CREB1	ENSG00000118260	0.0167749	0.954081		C2	ENSG00000231543	-0.218207	0.873733
IFIT1	ENSG00000185745	-0.0834943	0.94149		SPINK5	ENSG00000133710	0.175809	0.954842		TANK	ENSG00000136560	0.0378095	0.883187
IFNG	ENSG00000111537	0.142475	0.94188		TGFB1	ENSG00000105329	0.0640213	0.954984		HLA-DRB4	ENSG00000227357	-0.785853	0.883519
TNFRSF1A	ENSG00000067182	-0.0476356	0.942897		HLA-DQB1	ENSG00000231286	0.403072	0.955154		TLR6	ENSG00000174130	0.120021	0.886054
C8G	ENSG00000176919	0.0913422	0.943221		CXCL13	ENSG00000156234	0.14612	0.957024		CLEC4A	ENSG00000111729	-0.0594002	0.886869
C1QB	ENSG00000173369	0.118905	0.944334		CREB5	ENSG00000146592	0.093486	0.958319		KIR_Activating_Subgroup_1	NA	-0.158719	0.88935
MX1	ENSG00000157601	0.0832054	0.945373		LBP	ENSG00000129988	0.168596	0.958323		CSF3R	ENSG00000119535	0.232097	0.894208
CD180	ENSG00000134061	0.144871	0.947894		CYBB	ENSG00000165168	0.0778361	0.95955		CLEC5A	ENSG00000258227	0.244531	0.896225
CCL17	ENSG00000102970	0.149196	0.948431		SERPING1	ENSG00000149131	0.0375983	0.960527		F13A1	ENSG00000124491	0.207174	0.896805
ITGAL	ENSG00000005844	-0.101923	0.94847		PYCARD	ENSG00000103490	-0.0513388	0.961571		SERPING1	ENSG00000149131	-0.0594189	0.898188
IRAK1	ENSG00000184216	-0.0543179	0.949227		IL1RAP	ENSG00000196083	-0.0402494	0.961789		C1R	ENSG00000159403	-0.0898661	0.898968
LAMP3	ENSG00000078081	0.184562	0.950005		IL17B	ENSG00000127743	-0.0987092	0.96243		IRAK4	ENSG00000198001	0.033353	0.89961
TPTE	ENSG00000274391	0.141079	0.950309		CCL24	ENSG00000106178	-0.0539778	0.962691		DDX43	ENSG00000080007	0.202282	0.900361
IL16	ENSG00000172349	0.0897867	0.951604		CCL28	ENSG00000151882	-0.0539778	0.962691		IL1RAP	ENSG00000196083	0.0632304	0.902431
IL2RG	ENSG00000147168	0.182835	0.952262		CD1B	ENSG00000158485	-0.0539778	0.962691		NFATC4	ENSG00000100968	-0.0605731	0.910994
KIR3DL3	ENSG00000276084	0.162613	0.952575		TNFRSF13B	ENSG00000240505	-0.0539778	0.962691		IDO1	ENSG00000131203	0.145171	0.91569
CCL11	ENSG00000172156	-0.16845	0.955115		USP9Y	ENSG00000114374	-0.0539778	0.962691		GAGE1	ENSG00000205777	0.212377	0.917702
ELK1	ENSG00000126767	-0.0915053	0.955204		PASD1	ENSG00000166049	-0.0956557	0.964216		ITGB4	ENSG00000132470	0.16401	0.91884
CYBB	ENSG00000165168	0.0815759	0.955668		TNFRSF1B	ENSG00000028137	-0.0516277	0.964403		CCL2	ENSG00000108691	-0.221153	0.919145
CD8A	ENSG00000153563	0.14694	0.95699		IDO1	ENSG00000131203	0.0960046	0.964588		SAA1	ENSG00000173432	0.225933	0.91949
DMBT1	ENSG00000187908	-0.175289	0.962857		PIK3CD	ENSG00000171608	-0.0206761	0.9667		CCL14	ENSG00000276409	0.108426	0.919791
FCER2	ENSG00000104921	0.0782152	0.965267		TLR5	ENSG00000187554	0.0374796	0.96731		IL18	ENSG00000150782	0.084131	0.920934
SAA1	ENSG00000173432	0.15154	0.965281		CD6	ENSG00000013725	0.107922	0.967471		CD19	ENSG00000177455	0.0847911	0.922394
PLA2G1B	ENSG00000170890	-0.137195	0.966489		C1R	ENSG00000159403	0.0514397	0.967828		BCL6	ENSG00000113916	0.0525888	0.924541
IL15	ENSG00000164136	0.0692631	0.967709		CD9	ENSG00000010278	0.0551871	0.969209		IRAK2	ENSG00000134070	-0.141283	0.924991
MAP3K7	ENSG00000135341	0.0124467	0.968713		COLEC12	ENSG00000158270	0.0971684	0.96953		PTPRC	ENSG00000081237	0.1421	0.926718
C1QA	ENSG00000173372	0.0866027	0.970404		AMICA1	NA	0.0712056	0.969624		CD3EAP	ENSG00000117877	-0.0689572	0.927845
IL2RB	ENSG00000100385	0.117213	0.971417		IL17RB	ENSG00000056736	0.130558	0.970553		ECSIT	ENSG00000130159	0.0395651	0.935808
CD1C	ENSG00000158481	0.101775	0.971552		AICDA	ENSG00000111732	-0.0539778	0.97106		SIGLEC1	ENSG00000088827	0.15753	0.93613
IFIH1	ENSG00000115267	-0.0341675	0.97194		HLA-DQA1	ENSG00000228284	-0.350882	0.973669		CD79A	ENSG00000105369	0.159256	0.94204
REPS1	ENSG00000135597	0.0119931	0.97205		HSD11B1	ENSG00000117594	0.0540347	0.974661		C1S	ENSG00000182326	-0.0475543	0.944078
HLA-B	ENSG00000234745	-0.0672198	0.972523		DEFB1	ENSG00000164825	0.0993627	0.975097		CASP1	ENSG00000137752	0.0454709	0.946297
ITGB3	ENSG00000259207	-0.100139	0.973318		STAT6	ENSG00000166888	0.0200989	0.97517		HLA-DQB1	ENSG00000231286	0.421862	0.947596
CLEC4C	ENSG00000198178	0.115444	0.973358		IRF5	ENSG00000128604	0.110018	0.975793		KLRG1	ENSG00000139187	-0.172717	0.950213
ITGB1	ENSG00000150093	-0.0331994	0.975341		MAGEA1	ENSG00000198681	0.107562	0.979702		IL22RA2	ENSG00000164485	0.191004	0.950284
IL12B	ENSG00000113302	0.137042	0.975711		C1QA	ENSG00000173372	-0.0704956	0.980279		PLA2G1B	ENSG00000170890	0.153501	0.955341
MASP2	ENSG00000009724	0.107975	0.976149		LILRB3	ENSG00000204577	-0.0539778	0.981404		LYN	ENSG00000254087	0.10615	0.959717
KLRK1	ENSG00000213809	-0.113185	0.977873		MRC1	ENSG00000260314	0.0572502	0.982227		MICA	ENSG00000204520	0.0457385	0.960403
ZAP70	ENSG00000115085	-0.0635906	0.979367		IL10	ENSG00000136634	0.0878759	0.982351		SPA17	ENSG00000064199	-0.115394	0.96073
CSF1R	ENSG00000182578	-0.0638051	0.979909		NT5E	ENSG00000135318	-0.0290829	0.983533		KLRB1	ENSG00000111796	0.187791	0.962948
PSMD7	ENSG00000103035	-0.0173903	0.980416		MICB	ENSG00000204516	-0.0824025	0.983939		CD84	ENSG00000066294	0.0723647	0.96342
MAP3K5	ENSG00000197442	0.0221509	0.980519		MAPK8	ENSG00000107643	-0.0171764	0.984228		FOXJ1	ENSG00000129654	-0.141398	0.964965
CD276	ENSG00000103855	-0.0298364	0.980987		S100B	ENSG00000160307	0.101812	0.984761		CCRL2	ENSG00000121797	0.141752	0.965035
CCR1	ENSG00000163823	0.0749171	0.981447		NFATC2	ENSG00000101096	-0.0476542	0.9849		ICAM1	ENSG00000090339	0.0918752	0.966097
PRF1	ENSG00000180644	-0.0632115	0.981886		CSF1	ENSG00000184371	-0.0400764	0.984971		MAP2K4	ENSG00000065559	0.0163536	0.966511
CXCL13	ENSG00000156234	-0.0940078	0.981958		ITGA1	ENSG00000213949	-0.0422471	0.985091		CD4	ENSG00000010610	-0.0906438	0.967821
NLRC5	ENSG00000140853	-0.0349327	0.985016		SPN	ENSG00000197471	-0.0862022	0.9858		HMGB1	ENSG00000189403	-0.0142235	0.969046
IFNGR1	ENSG00000027697	-0.015883	0.98673		EPCAM	ENSG00000119888	-0.0660367	0.987353		CREB5	ENSG00000146592	0.0775876	0.96905
ITGAX	ENSG00000140678	-0.0592272	0.987011		ICAM1	ENSG00000090339	-0.0569399	0.987697		PECAM1	ENSG00000261371	-0.0572155	0.971088
GZMB	ENSG00000100453	0.0826397	0.987813		TNFSF11	ENSG00000120659	-0.0705802	0.987862		HAMP	ENSG00000105697	-0.108908	0.972399
TLR3	ENSG00000164342	-0.0262897	0.988105		MNX1	ENSG00000130675	-0.0597954	0.988357		F2RL1	ENSG00000164251	0.143349	0.972475
XCR1	ENSG00000173578	0.0478493	0.988683		IKBKE	ENSG00000263528	-0.0176654	0.989736		CCL21	ENSG00000137077	-0.187418	0.973003
IL34	ENSG00000157368	-0.0701509	0.988863		NOS2A	NA	-0.101156	0.989819		SERPINB2	ENSG00000197632	-0.0571505	0.97435
MS4A2	ENSG00000149534	0.0770032	0.989425		F2RL1	ENSG00000164251	-0.089439	0.989901		FCER1G	ENSG00000158869	-0.0730745	0.974411
IL3RA	ENSG00000185291	0.0842887	0.989723		AKT3	ENSG00000117020	0.0120884	0.990394		LTBR	NA	-0.0297085	0.974431
CCL14	ENSG00000276409	-0.038393	0.990224		EP300	ENSG00000100393	0.00600565	0.991344		PDCD1LG2	ENSG00000197646	-0.117006	0.976083
C4B	ENSG00000228454	-0.0493893	0.990325		SAA1	ENSG00000173432	0.0743935	0.991508		C1QB	ENSG00000173369	0.0743082	0.976276
IDO1	ENSG00000131203	0.0491663	0.990575		MARCO	ENSG00000019169	0.0548626	0.991582		NUP107	ENSG00000111581	0.0121788	0.977056
PLAU	ENSG00000122861	-0.0426969	0.990824		SMAD3	ENSG00000166949	-0.00710916	0.99188		HLA-DQA1	ENSG00000228284	-0.296522	0.979783
HLA-DMA	ENSG00000241394	0.0357634	0.990824		C1QB	ENSG00000173369	-0.0445964	0.991954		PRKCD	ENSG00000163932	-0.0316357	0.980297
TPSAB1	ENSG00000172236	0.0923902	0.99088		MME	ENSG00000196549	0.06517	0.992024		IL17RA	ENSG00000177663	0.0145156	0.981219
CEACAM6	ENSG00000086548	0.0683994	0.991122		GAGE1	ENSG00000205777	-0.0641716	0.992677		CD7	ENSG00000173762	-0.0714195	0.983
CTCFL	ENSG00000124092	0.0669724	0.992201		PTGS2	ENSG00000073756	-0.075601	0.992872		YTHDF2	ENSG00000198492	0.0258908	0.983241
CTSW	ENSG00000172543	-0.060091	0.992586		CCL26	ENSG00000006606	-0.0478765	0.992965		CTSL	ENSG00000135047	0.0199138	0.985379
CXCL10	ENSG00000169245	0.0673022	0.992849		PDCD1LG2	ENSG00000197646	-0.0650194	0.993041		BCL2	ENSG00000171791	-0.032078	0.985933
CD33	ENSG00000105383	-0.0665503	0.99313		PPBP	ENSG00000163736	0.0572488	0.993894		AICDA	ENSG00000111732	0.0342272	0.987417
MASP1	ENSG00000127241	0.0701361	0.994208		TNFRSF14	ENSG00000157873	0.0145921	0.994195		TNFSF13	ENSG00000161955	0.0228014	0.987433
BST2	ENSG00000130303	-0.013128	0.994437		MAP2K4	ENSG00000065559	-0.00682672	0.994467		JAK1	ENSG00000162434	0.00823735	0.987632
ICAM2	ENSG00000108622	-0.0238892	0.994979		ATM	ENSG00000149311	0.0346052	0.994975		CCND3	ENSG00000112576	0.0169869	0.989648
PDCD1LG2	ENSG00000197646	-0.0519861	0.995545		DUSP6	ENSG00000139318	-0.0484688	0.995029		ITGA4	ENSG00000115232	0.0512491	0.989665
CD38	ENSG00000004468	-0.0406117	0.997077		HLA-B	ENSG00000234745	0.0279765	0.995179		HLA-B	ENSG00000234745	-0.0392433	0.989867
IL11RA	ENSG00000137070	-0.00851774	0.997569		SOCS1	ENSG00000185338	-0.0405346	0.995562		CDH5	ENSG00000179776	0.022457	0.99005
DUSP4	ENSG00000120875	0.0292662	0.997912		TTK	ENSG00000112742	-0.0593742	0.99573		IRAK1	ENSG00000184216	0.0219781	0.99088
KIR_Activating_Subgroup_2	NA	0.034924	0.99801		MPPED1	ENSG00000186732	-0.0382739	0.995793		MERTK	ENSG00000153208	-0.0149853	0.992631
BAGE	NA	0.0207163	0.998042		IFI27	ENSG00000275214	-0.0276455	0.996481		SMPD3	ENSG00000103056	0.0590838	0.992763
NLRP3	ENSG00000162711	-0.0227474	0.998186		IL26	ENSG00000111536	0.0266063	0.996887		CXCL13	ENSG00000156234	0.0521126	0.994019
HLA-DRA	ENSG00000230726	-0.0180427	0.998606		POU2F2	ENSG00000028277	-0.0243178	0.996897		HLA-C	ENSG00000204525	-0.0393926	0.994026
TNFRSF8	ENSG00000120949	-0.0191572	0.998641		CD2	ENSG00000116824	-0.0173131	0.997435		IL1RL2	ENSG00000115598	-0.059707	0.994057
JAK2	ENSG00000096968	0.00462276	0.998682		TLR4	ENSG00000136869	0.0155084	0.997534		SH2D1A	ENSG00000183918	0.0407358	0.994298
CREB5	ENSG00000146592	-0.0158985	0.998767		TLR6	ENSG00000174130	0.0176731	0.997539		BIRC5	ENSG00000089685	0.0631151	0.995246
TNFRSF17	ENSG00000048462	0.0193197	0.999111		FCGR2B	ENSG00000072694	0.0342955	0.997643		BCL10	ENSG00000142867	-0.00953598	0.99542
GNLY	ENSG00000115523	-0.034871	0.999126		IRF7	ENSG00000185507	0.0124335	0.998017		NFATC1	ENSG00000131196	-0.018469	0.995605
TIGIT	ENSG00000181847	0.0205938	0.99919		IL12A	ENSG00000168811	-0.0335234	0.998018		RELA	ENSG00000173039	-0.00807845	0.996031
MAP2K2	ENSG00000126934	-0.00358647	0.999297		PRM1	ENSG00000175646	-0.0284345	0.998066		FLT3LG	ENSG00000090554	-0.00601739	0.99656
HLA-DQA1	ENSG00000228284	0.0543603	0.999359		BATF	ENSG00000156127	-0.0258066	0.998171		TAP1	ENSG00000224212	-0.0183794	0.997125
TTK	ENSG00000112742	0.020847	0.999473		CCL7	ENSG00000108688	-0.0148462	0.998469		FAS	ENSG00000026103	-0.00956608	0.997959
CXCR3	ENSG00000186810	0.013716	0.99951		CSF2	ENSG00000164400	0.0245156	0.998472		TTK	ENSG00000112742	-0.0385273	0.998071
CCL22	ENSG00000102962	-0.0104262	0.999735		HLA-G	ENSG00000233095	0.00927882	0.998856		CD99	ENSG00000002586	-0.00733079	0.998213
HLA-DQB1	ENSG00000231286	0.0187899	0.9999		CD209	ENSG00000090659	0.017053	0.999119		C1QA	ENSG00000173372	0.0161071	0.998885
CD44	ENSG00000026508	-0.00193125	0.999959		SPANXB1	ENSG00000227234	0.0181125	0.999549		NLRP3	ENSG00000162711	-0.0131612	0.999349
CD5	ENSG00000110448	0.00430052	0.999973		IL4R	ENSG00000077238	0.0108865	0.999666		CD74	ENSG00000019582	-0.0093421	0.999361
IKBKG	ENSG00000269335	0.000498204	0.999989		NLRP3	ENSG00000162711	0.00958617	0.999678		LRP1	ENSG00000123384	-0.0045935	0.999558
GZMK	ENSG00000113088	0.00189221	0.999994		TAP2	ENSG00000223481	-0.00331117	0.999737		ITGB2	ENSG00000160255	0.00986997	0.999577
IL18RAP	ENSG00000115607	0.000991978	0.999998		TREM2	ENSG00000095970	-0.00449206	0.999767		TNFSF13B	ENSG00000102524	0.0142058	0.999655
MAGEA3	ENSG00000221867	-0.000670786	0.999999		VCAM1	ENSG00000162692	0.000238921	1		IL6ST	ENSG00000134352	-0.000433402	0.999995

## Sheet: P value sorted
	Metformin vs. Fibrotic						Fibrotic vs. non-fibrotic							Metformin vs. non-fibrotic
Gene	ensembl_gene_id	log2FC	p-value			Gene	ensembl_gene_id	log2FC	p-value				Gene	ensembl_gene_id	log2FC	p-value
ARG2	ENSG00000081181	3.53265	0.00022033			GZMB	ENSG00000100453	2.37956	0.000983576				ARG2	ENSG00000081181	3.74499	7.40264e-05
CD244	ENSG00000122223	2.77925	9.83496e-05			DUSP4	ENSG00000120875	2.23236	0.000390757				CXCL2	ENSG00000081041	2.99928	0.0113237
IL1B	ENSG00000125538	1.97667	0.0100948			KLRK1	ENSG00000213809	2.13691	0.00303962				TREM1	ENSG00000124731	2.83457	0.000201491
SOCS1	ENSG00000185338	1.90072	0.00119176			CCL22	ENSG00000102962	2.12991	0.000645508				CFD	ENSG00000197766	2.7775	0.00679695
PRG2	ENSG00000186652	1.60219	0.00486549			XCL2	ENSG00000143185	2.11508	0.0019515				IL1B	ENSG00000125538	2.69658	0.000459081
CD28	ENSG00000178562	1.58265	0.00393306			CD207	ENSG00000116031	2.09265	0.000179901				CD207	ENSG00000116031	2.68243	4.8391e-06
RRAD	ENSG00000166592	1.57345	0.0162894			LIF	ENSG00000128342	2.06402	0.0158669				IL8	ENSG00000169429	2.54287	0.0109881
MNX1	ENSG00000130675	1.50396	0.00417658			KLRC2	ENSG00000205809	2.03789	0.00958249				IFNL2	ENSG00000183709	2.51013	0.000484551
APOE	ENSG00000130203	1.42804	0.00202468			CD8B	ENSG00000172116	1.96762	0.000231497				CCL13	ENSG00000181374	2.50496	7.26919e-05
SLC11A1	ENSG00000018280	1.42219	0.0132987			IL23A	ENSG00000110944	1.88681	0.00242451				GZMB	ENSG00000100453	2.4622	0.000486669
IL10	ENSG00000136634	1.38603	0.0264247			CD38	ENSG00000004468	1.87792	0.0081925				CXCL14	ENSG00000145824	2.46122	0.0163942
CCL26	ENSG00000006606	1.22945	0.0227167			IL1RL1	ENSG00000115602	1.87641	0.00158863				IL1A	ENSG00000115008	2.45444	0.000975118
OSM	ENSG00000099985	1.21831	0.00657729			CCL1	ENSG00000108702	1.85535	0.0010403				CCR3	ENSG00000183625	2.41984	7.69238e-05
CDKN1A	ENSG00000124762	1.21046	0.0476416			TIGIT	ENSG00000181847	1.84946	0.00693167				TAL1	ENSG00000162367	2.40079	0.000329155
LILRB2	ENSG00000131042	1.20921	0.0190279			IL12RB2	ENSG00000081985	1.84116	0.00584212				C9	ENSG00000113600	2.36195	0.000335264
RUNX3	ENSG00000020633	1.20918	0.0348652			CEACAM6	ENSG00000086548	1.83284	0.00750052				XCL2	ENSG00000143185	2.35606	0.000476005
LYN	ENSG00000254087	1.16782	0.0227524			KIR3DL2	ENSG00000275083	1.83181	0.0125875				IRGM	ENSG00000237693	2.35207	0.000261627
MARCO	ENSG00000019169	1.16332	0.0410502			KIR2DS1	ENSG00000276327	1.81666	0.0140591				GZMM	ENSG00000197540	2.34939	0.000565391
TFRC	ENSG00000072274	1.14661	0.0301718			IL18RAP	ENSG00000115607	1.81423	0.00909852				IL22	ENSG00000127318	2.3384	8.8337e-05
ISG20	ENSG00000172183	1.07709	0.0044049			CD247	ENSG00000198821	1.80583	0.0059175				IL5	ENSG00000113525	2.32742	0.0012615
ATM	ENSG00000149311	1.04805	0.0232594			GZMK	ENSG00000113088	1.79262	0.0174885				CCL1	ENSG00000108702	2.32288	5.8159e-05
REL	ENSG00000162924	1.00903	0.0239024			CD70	ENSG00000125726	1.77796	0.0173266				SSX4	ENSG00000268009	2.28995	0.00170617
IL26	ENSG00000111536	0.927182	0.0415246			IL22	ENSG00000127318	1.77491	0.00232495				CXCR2	ENSG00000180871	2.28169	0.000320194
PLAUR	ENSG00000011422	0.918418	0.0281963			CD1A	ENSG00000158477	1.76562	0.00621576				CCL18	ENSG00000278006	2.26829	0.00187351
RORA	ENSG00000069667	0.844538	0.00022808			MAGEA3	ENSG00000221867	1.76133	0.00694343				DUSP4	ENSG00000120875	2.26163	0.000231418
CD83	ENSG00000112149	0.840346	0.00689149			MAGEC2	ENSG00000046774	1.75265	0.00979817				APOE	ENSG00000130203	2.23227	7.98909e-06
LRRN3	ENSG00000173114	0.819508	0.00357672			TREM1	ENSG00000124731	1.73645	0.0206577				CD8B	ENSG00000172116	2.22532	3.4895e-05
NOTCH1	ENSG00000148400	0.80716	0.00341359			KIR3DL3	ENSG00000276084	1.72057	0.0135022				IFNA8	ENSG00000120242	2.22079	0.00994416
TLR5	ENSG00000187554	0.760332	0.000201571			MASP2	ENSG00000009724	1.70622	0.00938822				CD70	ENSG00000125726	2.21521	0.00239484
VEGFA	ENSG00000112715	0.760294	0.00595194			ICOS	ENSG00000163600	1.70464	0.045249				ICOS	ENSG00000163600	2.20866	0.00670086
CSF1	ENSG00000184371	0.758906	0.013667			IFNL2	ENSG00000183709	1.68217	0.019383				GATA3	ENSG00000107485	2.19351	0.000348776
ADORA2A	ENSG00000128271	0.748053	0.0472337			CTCFL	ENSG00000124092	1.67202	0.0195562				CD28	ENSG00000178562	2.14557	0.00012874
CARD9	ENSG00000187796	0.744798	0.0243042			PDCD1	ENSG00000276977	1.6681	0.00399555				IL25	ENSG00000166090	2.121	0.000411168
ITGA2B	ENSG00000005961	0.641157	0.00232948			GZMM	ENSG00000197540	1.66004	0.0150375				CCL22	ENSG00000102962	2.11948	0.000473552
IFITM1	ENSG00000185885	0.631865	0.030264			TNFRSF17	ENSG00000048462	1.64703	0.00724549				IL13	ENSG00000169194	2.11698	0.000107757
PRKCD	ENSG00000163932	0.565977	0.00988971			CCL18	ENSG00000278006	1.62806	0.0294488				CD247	ENSG00000198821	2.11492	0.0010693
TLR9	ENSG00000239732	0.529494	0.00861503			IL25	ENSG00000166090	1.6173	0.00693787				HLA-DOB	ENSG00000243496	2.11123	0.00147183
ATG16L1	ENSG00000085978	0.507939	0.0140473			CCL19	ENSG00000172724	1.60947	0.00690393				CDKN1A	ENSG00000124762	2.10773	0.000484567
JAK3	ENSG00000105639	0.499495	0.000419158			CCL16	ENSG00000275152	1.60749	0.0210954				LCN2	ENSG00000148346	2.10116	0.000332572
PNMA1	ENSG00000176903	0.463206	0.0027432			CXCR3	ENSG00000186810	1.60605	0.00621218				KIR3DL2	ENSG00000275083	2.10078	0.00329007
IKBKB	ENSG00000104365	0.460974	0.037713			IL5	ENSG00000113525	1.59202	0.0305575				ITK	ENSG00000113263	2.10023	0.0033295
MICA	ENSG00000204520	0.446452	0.0474631			TLR10	ENSG00000174123	1.5843	0.0144949				CCL19	ENSG00000172724	2.09337	0.000446143
C5	ENSG00000106804	0.436461	0.00286665			CXCL9	ENSG00000138755	1.57029	0.0252721				IL21	ENSG00000138684	2.09004	0.00444287
NFKB1	ENSG00000109320	0.423126	0.015525			LCN2	ENSG00000148346	1.55198	0.00762607				CRP	ENSG00000132693	2.08316	0.00297609
MR1	ENSG00000153029	0.404098	0.000903867			CD48	ENSG00000117091	1.54467	0.0149025				MAGEC2	ENSG00000046774	2.04678	0.0020536
PSEN2	ENSG00000143801	0.346075	0.00093695			IL2RB	ENSG00000100385	1.52915	0.0187871				IL1R2	ENSG00000115590	2.04618	0.00148307
IRF2	ENSG00000168310	0.340995	0.0225405			GATA3	ENSG00000107485	1.49171	0.0143351				KLRK1	ENSG00000213809	2.02372	0.00360984
TBK1	ENSG00000183735	0.340733	0.0173935			IL24	ENSG00000162892	1.49145	0.00607374				IFNB1	ENSG00000171855	2.01761	0.00689591
LGALS3	ENSG00000131981	0.335583	0.00409442			CT45A1	ENSG00000268940	1.48478	0.00392501				IL2	ENSG00000109471	2.00267	0.00612586
CASP3	ENSG00000164305	0.320826	0.00104473			IFNA17	ENSG00000234829	1.47993	0.0419814				IL17F	ENSG00000112116	1.99917	0.00789056
MAPK1	ENSG00000100030	0.307335	0.0442035			SPO11	ENSG00000054796	1.46025	0.0237276				CD80	ENSG00000121594	1.98763	0.00195249
ANP32B	ENSG00000136938	0.302163	0.000650962			AMBP	ENSG00000106927	1.45149	0.00323683				LY9	ENSG00000122224	1.98527	0.00279003
PDGFRB	ENSG00000113721	0.296405	0.0268409			SPACA3	ENSG00000141316	1.44383	0.0286213				CD1A	ENSG00000158477	1.97829	0.00173415
PIN1	ENSG00000127445	0.294131	0.0357759			TNFRSF18	ENSG00000186891	1.44334	0.0103106				IL24	ENSG00000162892	1.9724	0.000312256
CD164	ENSG00000135535	0.275899	0.00878086			LTF	ENSG00000012223	1.4432	0.0357847				CT45A1	ENSG00000268940	1.97188	0.000163167
NFATC3	ENSG00000072736	0.223816	0.00321779			CCL17	ENSG00000102970	1.43776	0.0189392				TNFRSF13C	ENSG00000159958	1.95316	0.00189695
CKLF	ENSG00000217555	0.186368	0.0137562			TAL1	ENSG00000162367	1.43359	0.0315475				PRG2	ENSG00000186652	1.93691	0.000607422
ATG7	ENSG00000197548	-0.250197	0.000465177			PRF1	ENSG00000180644	1.41319	0.00164445				MEFV	ENSG00000103313	1.92962	0.00372338
IKBKE	ENSG00000263528	-0.342134	0.0390698			ITGB4	ENSG00000132470	1.41036	0.0104052				PDCD1	ENSG00000276977	1.92392	0.000771718
TAB1	ENSG00000100324	-0.394762	0.000105943			IRGM	ENSG00000237693	1.40515	0.0278379				MAGEC1	ENSG00000155495	1.91973	0.00458584
ATG10	ENSG00000152348	-0.414224	0.0223333			IL22RA1	ENSG00000142677	1.40135	0.00599097				IFNA17	ENSG00000234829	1.9189	0.00596487
PRKCE	ENSG00000171132	-0.450522	0.0205727			TPTE	ENSG00000274391	1.39635	0.0180194				LTK	ENSG00000062524	1.90752	0.00189575
BST1	ENSG00000109743	-0.45056	0.00827006			CCR3	ENSG00000183625	1.3788	0.0194493				ARG1	ENSG00000118520	1.90576	0.00720483
PSMB9	ENSG00000240118	-0.472984	0.00777507			CD79B	ENSG00000007312	1.36231	0.00944556				FUT5	ENSG00000130383	1.90497	0.00533901
IFI16	ENSG00000163565	-0.49055	0.00166397			IL13	ENSG00000169194	1.32853	0.0122356				CEACAM6	ENSG00000086548	1.90124	0.00424238
IL13RA1	ENSG00000131724	-0.581142	0.0010001			ULBP2	ENSG00000131015	1.32076	0.0211036				TARP	ENSG00000211689	1.89617	0.00625105
BMI1	ENSG00000168283	-0.612974	0.000404517			C8G	ENSG00000176919	1.31142	0.000403552				CD1E	ENSG00000158488	1.88991	5.33536e-05
BCL2	ENSG00000171791	-0.614367	0.019932			CD24	ENSG00000272398	1.30345	0.0394004				KIR3DL3	ENSG00000276084	1.88319	0.00528813
CD55	ENSG00000196352	-0.618549	0.000110031			CCL13	ENSG00000181374	1.29836	0.0336303				CCL16	ENSG00000275152	1.88197	0.00528022
PPARG	ENSG00000132170	-0.628975	0.0425557			LILRA5	ENSG00000187116	1.29203	0.0394401				CCL25	ENSG00000131142	1.8811	0.00479963
ZNF205	ENSG00000122386	-0.644977	0.0180689			ITGAL	ENSG00000005844	1.28844	0.00232994				IL23R	ENSG00000162594	1.87656	0.00119698
CD9	ENSG00000010278	-0.665531	0.0243238			IL3	ENSG00000164399	1.27217	0.031732				TIGIT	ENSG00000181847	1.87005	0.00481715
ANXA1	ENSG00000135046	-0.670668	0.00684078			DDX43	ENSG00000080007	1.2673	0.0392088				ICAM4	ENSG00000105371	1.86601	0.0067275
APP	ENSG00000142192	-0.678293	0.0011334			HLA-A	ENSG00000206503	1.23358	0.000922938				SOCS1	ENSG00000185338	1.86019	0.00105004
CD200	ENSG00000091972	-0.682039	0.0196317			CD1E	ENSG00000158488	1.22466	0.00624976				CD244	ENSG00000122223	1.85592	0.00419911
IL6R	ENSG00000160712	-0.715341	0.000481468			IL5RA	ENSG00000091181	1.18277	0.0318513				KIR2DS1	ENSG00000276327	1.85159	0.0095983
NRP1	ENSG00000099250	-0.728081	0.00274786			ICOSLG	ENSG00000160223	1.18229	0.0254037				TNFRSF18	ENSG00000186891	1.84817	0.000909182
TGFB2	ENSG00000092969	-0.757053	0.0212071			CD3D	ENSG00000167286	1.12643	0.0311355				C8A	ENSG00000157131	1.84428	0.0102566
DDX58	ENSG00000107201	-0.759592	0.000800135			FOXP3	ENSG00000049768	1.10985	0.0259311				AMBP	ENSG00000106927	1.84218	0.000211809
CASP8	ENSG00000064012	-0.850339	1.51876e-06			ROPN1	ENSG00000065371	1.09543	0.016471				CD38	ENSG00000004468	1.83731	0.00743999
TLR4	ENSG00000136869	-0.927834	0.00192683			SH2D1A	ENSG00000183918	1.07502	0.04361				ULBP2	ENSG00000131015	1.83611	0.00114034
FYN	ENSG00000010810	-0.937503	2.37839e-05			PTGDR2	ENSG00000183134	1.01787	0.0364521				KLRC2	ENSG00000205809	1.82097	0.0165758
THBD	ENSG00000178726	-1.06858	0.016876			CSF2RB	ENSG00000100368	1.00912	0.0244152				TLR10	ENSG00000174123	1.82088	0.00384264
IL4R	ENSG00000077238	-1.13624	0.0462749			TNFRSF10B	ENSG00000120889	0.969754	0.0191917				IL18RAP	ENSG00000115607	1.81522	0.0069709
CDH1	ENSG00000039068	-1.16589	0.00804548			ZAP70	ENSG00000115085	0.956343	0.0217755				MASP2	ENSG00000009724	1.81419	0.0044249
ITGB4	ENSG00000132470	-1.24635	0.023884			BAGE	NA	0.928081	0.0373896				GZMK	ENSG00000113088	1.79451	0.0137527
KLRD1	ENSG00000134539	-1.29375	0.0491904			CD274	ENSG00000120217	0.839751	0.0122787				SPO11	ENSG00000054796	1.77922	0.00443877
CFI	ENSG00000205403	-1.44045	3.21957e-05			TNFSF8	ENSG00000106952	0.835651	0.0429539				IL1RN	ENSG00000136689	1.77576	0.0174718
CFB	ENSG00000241534	-1.52518	0.0455659			MST1R	ENSG00000164078	0.803613	0.0168873				CCR9	ENSG00000173585	1.76803	0.0189589
TNFSF10	ENSG00000121858	-1.595	3.75701e-09			ADA	ENSG00000196839	0.795384	0.038186				MAGEA3	ENSG00000221867	1.76066	0.0052977
TNFSF14	ENSG00000125735	-2.28433	0.0166512			MAPKAPK2	ENSG00000162889	0.775391	0.0012666				SPACA3	ENSG00000141316	1.74669	0.00604553
C3	ENSG00000125730	-2.41212	0.00557812			CD163	ENSG00000177575	0.700123	0.0375757				LILRA5	ENSG00000187116	1.74109	0.00396031
DPP4	ENSG00000197635	-2.83118	0.00098693			CD58	ENSG00000116815	0.670065	0.00293197				CTCFL	ENSG00000124092	1.739	0.0118614
						PSMB9	ENSG00000240118	0.660667	0.000354297				PTGDR2	ENSG00000183134	1.73092	0.000367184
						CD83	ENSG00000112149	0.642382	0.0403603				AIRE	ENSG00000160224	1.72912	0.00444365
						BCL2	ENSG00000171791	0.582289	0.0277958				CCL8	ENSG00000108700	1.72449	0.0120718
						MEF2C	ENSG00000081189	0.561696	0.000116341				CCL3L1	ENSG00000277796	1.7026	0.0405333
						LRRN3	ENSG00000173114	0.56095	0.0473801				IL1RL1	ENSG00000115602	1.69624	0.00290815
						TCF7	ENSG00000081059	0.513156	0.0258936				IL21R	ENSG00000103522	1.69283	0.00798814
						PVR	ENSG00000073008	0.50977	0.0058583				CXCL5	ENSG00000163735	1.69252	0.000684149
						RPS6	ENSG00000137154	0.495386	0.0112046				IL12B	ENSG00000113302	1.683	0.0362311
						CREBBP	ENSG00000005339	0.492505	0.00496706				TNFRSF10C	ENSG00000173535	1.67689	0.00226124
						SH2B2	ENSG00000160999	0.482697	0.0476961				LTF	ENSG00000012223	1.67684	0.0109929
						ECSIT	ENSG00000130159	0.337592	0.0248502				PBK	ENSG00000168078	1.67177	0.0106826
						MAP2K1	ENSG00000169032	0.327821	0.00296119				TNFRSF17	ENSG00000048462	1.66635	0.0050235
						SMAD2	ENSG00000175387	0.27038	0.00740947				CTSG	ENSG00000100448	1.65644	0.0127178
						NOD1	ENSG00000106100	0.260142	0.0462236				S100A12	ENSG00000163221	1.65354	0.0237615
						TFE3	ENSG00000068323	0.257937	0.00280073				IL23A	ENSG00000110944	1.65071	0.00563005
						TAB1	ENSG00000100324	0.202795	0.0347328				FUT7	ENSG00000180549	1.64823	0.00560351
						ATG7	ENSG00000197548	0.195736	0.00470329				IL2RB	ENSG00000100385	1.64636	0.00881082
						ATF2	ENSG00000115966	0.142044	0.0129667				IL3	ENSG00000164399	1.63903	0.0041769
						PSEN1	ENSG00000080815	-0.207064	0.00428701				CEACAM1	ENSG00000079385	1.62968	0.00486796
						GTF3C1	ENSG00000077235	-0.220662	0.0145584				CXCR3	ENSG00000186810	1.61976	0.00438391
						JAK2	ENSG00000096968	-0.263566	0.0292133				CD24	ENSG00000272398	1.61003	0.00794474
						TIRAP	ENSG00000150455	-0.293229	0.0175288				CD160	ENSG00000117281	1.59519	0.0192313
						IKBKG	ENSG00000269335	-0.345797	0.0157546				CCL17	ENSG00000102970	1.58695	0.00736428
						IGF2R	ENSG00000197081	-0.375272	0.00549416				IRF4	ENSG00000137265	1.56727	0.00432236
						LGALS3	ENSG00000131981	-0.379663	0.00135028				PMCH	ENSG00000183395	1.56394	0.0023474
						MAPK1	ENSG00000100030	-0.381666	0.0115224				CCL3	ENSG00000278567	1.55957	0.0228291
						CX3CR1	ENSG00000168329	-0.389011	0.0285946				IL27	ENSG00000197272	1.55911	0.0160685
						BMI1	ENSG00000168283	-0.411389	0.0136031				CEBPB	ENSG00000172216	1.5575	0.00466869
						ABL1	ENSG00000097007	-0.417826	0.00859607				TNFSF15	ENSG00000181634	1.54494	0.0171822
						DOCK9	ENSG00000088387	-0.434248	0.0221139				CXCL10	ENSG00000169245	1.54144	0.0348209
						ATG10	ENSG00000152348	-0.435694	0.016086				RUNX3	ENSG00000020633	1.5384	0.00530384
						AXL	ENSG00000167601	-0.445972	0.0246077				TPTE	ENSG00000274391	1.53743	0.00707764
						PIN1	ENSG00000127445	-0.449299	0.0015				FOXP3	ENSG00000049768	1.52164	0.00178566
						MAPK11	ENSG00000185386	-0.518783	0.0267559				TNFRSF10B	ENSG00000120889	1.52145	0.000276686
						PRKCD	ENSG00000163932	-0.597612	0.00654611				POU2AF1	ENSG00000110777	1.51373	0.0270703
						C7	ENSG00000112936	-0.646032	0.0157398				FCGR1A	ENSG00000150337	1.51266	0.0146765
						CXCL16	ENSG00000161921	-0.660332	0.0394193				NEFL	ENSG00000277586	1.50876	0.00460986
						UBC	ENSG00000150991	-0.678159	0.0092373				SH2D1B	ENSG00000198574	1.4948	0.0220638
						IKBKB	ENSG00000104365	-0.695509	0.00184021				ICOSLG	ENSG00000160223	1.48874	0.00369579
						LYN	ENSG00000254087	-1.06167	0.039758				CD83	ENSG00000112149	1.48273	1.10109e-05
						CD34	ENSG00000174059	-1.09404	0.0270418				CD3D	ENSG00000167286	1.47771	0.0034867
						STAT2	ENSG00000170581	-1.17072	0.00127449				IL10	ENSG00000136634	1.47391	0.0142218
													CD3E	ENSG00000198851	1.46874	0.0412274
													CD86	ENSG00000114013	1.46693	0.00422105
													ISG20	ENSG00000172183	1.46616	0.000143804
													KLRF1	ENSG00000150045	1.46411	0.00158715
													CEACAM8	ENSG00000124469	1.45736	0.0221833
													MNX1	ENSG00000130675	1.44416	0.00439355
													IL5RA	ENSG00000091181	1.44359	0.00651037
													MAGEA4	ENSG00000147381	1.42757	0.0348132
													ROPN1	ENSG00000065371	1.42456	0.00150297
													OSM	ENSG00000099985	1.42433	0.00123956
													CD27	ENSG00000139193	1.42419	0.042741
													FPR2	ENSG00000171049	1.41186	0.00510099
													C8G	ENSG00000176919	1.40276	0.000128235
													LRRN3	ENSG00000173114	1.38046	6.91407e-06
													PRF1	ENSG00000180644	1.34998	0.00182675
													SPP1	ENSG00000118785	1.34842	0.047597
													CXCR4	ENSG00000121966	1.33845	0.0409015
													CSF3	ENSG00000108342	1.33457	0.0302088
													CSF2RB	ENSG00000100368	1.32619	0.0024029
													MAGEB2	ENSG00000099399	1.32574	0.0302667
													IL12RB2	ENSG00000081985	1.29443	0.0469294
													CD48	ENSG00000117091	1.27686	0.0388551
													CD8A	ENSG00000153563	1.27414	0.0492394
													CD3G	ENSG00000160654	1.27189	0.0374565
													IFNA7	ENSG00000214042	1.26748	0.00332316
													MS4A1	ENSG00000156738	1.26611	0.0412571
													TNFRSF4	ENSG00000186827	1.26498	0.0305757
													SLC11A1	ENSG00000018280	1.23556	0.0265047
													BTLA	ENSG00000186265	1.22491	0.0312591
													TNFAIP3	ENSG00000118503	1.22473	0.00341685
													MARCO	ENSG00000019169	1.21818	0.0258307
													DEFB1	ENSG00000164825	1.21768	0.0341398
													CSF2	ENSG00000164400	1.19854	0.0378391
													LCK	ENSG00000182866	1.19414	0.0323936
													CTAGE1	ENSG00000212710	1.19313	0.033458
													BID	ENSG00000015475	1.19003	0.0219821
													IL7R	ENSG00000168685	1.18738	0.0412073
													ITGAL	ENSG00000005844	1.18652	0.0035492
													KLRC1	ENSG00000134545	1.18391	0.0194009
													CCL26	ENSG00000006606	1.18158	0.0234682
													REL	ENSG00000162924	1.16726	0.00680328
													C8B	ENSG00000021852	1.16455	0.0403005
													CLEC6A	ENSG00000205846	1.16138	0.0469103
													ADA	ENSG00000196839	1.15504	0.00194495
													CFP	ENSG00000126759	1.1482	0.0285087
													IL7	ENSG00000104432	1.14753	0.0319779
													NFKBIA	ENSG00000100906	1.13082	0.0104148
													CXCR6	ENSG00000172215	1.10224	0.0242979
													CD79B	ENSG00000007312	1.08472	0.0334362
													ATM	ENSG00000149311	1.08266	0.0150405
													CCR1	ENSG00000163823	1.06996	0.0333492
													CD274	ENSG00000120217	1.0419	0.00156488
													TNFSF8	ENSG00000106952	1.03962	0.00848961
													LTA	ENSG00000238130	1.01011	0.027551
													BTK	ENSG00000010671	1.00984	0.0266969
													LILRA1	ENSG00000277398	1.00436	0.0311317
													IL26	ENSG00000111536	0.953788	0.0291057
													BAGE	NA	0.948798	0.0269486
													CARD9	ENSG00000187796	0.920848	0.00405856
													ZAP70	ENSG00000115085	0.892752	0.0269054
													VEGFA	ENSG00000112715	0.870574	0.00134065
													CD58	ENSG00000116815	0.841923	0.000208685
													SH2B2	ENSG00000160999	0.799215	0.000817793
													TLR5	ENSG00000187554	0.797811	7.62253e-05
													ATG16L1	ENSG00000085978	0.772455	0.000232613
													TCF7	ENSG00000081059	0.766618	0.000773009
													TLR7	ENSG00000196664	0.750642	0.0351917
													TLR9	ENSG00000239732	0.728229	0.000333853
													CSF1	ENSG00000184371	0.718829	0.0156436
													RORA	ENSG00000069667	0.708937	0.00100869
													SIGIRR	ENSG00000185187	0.660901	0.041959
													NOTCH1	ENSG00000148400	0.65297	0.0135239
													HAVCR2	ENSG00000135077	0.634476	0.0318296
													TGFB1	ENSG00000105329	0.618957	0.0232298
													MR1	ENSG00000153029	0.609607	4.05776e-06
													TFEB	ENSG00000112561	0.604747	0.00069598
													LAG3	ENSG00000089692	0.575745	0.0236106
													C5	ENSG00000106804	0.571412	0.000125998
													MAPKAPK2	ENSG00000162889	0.566075	0.0129707
													CASP10	ENSG00000003400	0.550694	0.0266109
													IFITM2	ENSG00000185201	0.515935	0.0337061
													PSEN2	ENSG00000143801	0.50417	6.95056e-06
													TICAM2	ENSG00000243414	0.470374	0.0338853
													ITGA2B	ENSG00000005961	0.467654	0.0202049
													MAF	ENSG00000178573	0.459995	0.0269117
													MAP2K1	ENSG00000169032	0.459239	5.8202e-05
													PVR	ENSG00000073008	0.431574	0.0154816
													PNMA1	ENSG00000176903	0.427342	0.00408053
													MEF2C	ENSG00000081189	0.423395	0.00162352
													RPS6	ENSG00000137154	0.399892	0.035335
													JAK3	ENSG00000105639	0.386972	0.00352099
													ETS1	ENSG00000134954	0.297393	0.038397
													MAP3K5	ENSG00000197442	0.28912	0.0476627
													TOLLIP	ENSG00000078902	0.288971	0.010341
													TFE3	ENSG00000068323	0.286056	0.000755986
													CHUK	ENSG00000213341	0.284708	0.0396643
													CASP3	ENSG00000164305	0.280584	0.00265291
													CD164	ENSG00000135535	0.250802	0.0136147
													ANP32B	ENSG00000136938	0.242449	0.00373028
													CYLD	ENSG00000083799	0.180619	0.0439674
													NFATC3	ENSG00000072736	0.171064	0.0189161
													ITCH	ENSG00000078747	0.16263	0.0397174
													TAB1	ENSG00000100324	-0.191967	0.0389178
													CD46	ENSG00000117335	-0.197223	0.0403889
													CD81	ENSG00000110651	-0.215572	0.0362535
													JAK2	ENSG00000096968	-0.258943	0.0264221
													EWSR1	ENSG00000182944	-0.261837	0.0346528
													ILF3	ENSG00000129351	-0.27605	0.00583602
													IGF2R	ENSG00000197081	-0.293123	0.0247128
													TYK2	ENSG00000105397	-0.301955	0.00202536
													PSMB8	ENSG00000230034	-0.303635	0.021338
													IFI16	ENSG00000163565	-0.336341	0.0236943
													IKBKG	ENSG00000269335	-0.345299	0.0125471
													IKBKE	ENSG00000263528	-0.3598	0.0238051
													AXL	ENSG00000167601	-0.385965	0.0460473
													PLA2G6	ENSG00000184381	-0.390288	0.0150979
													IL6R	ENSG00000160712	-0.3986	0.0385646
													ANXA1	ENSG00000135046	-0.531716	0.0267137
													BST1	ENSG00000109743	-0.553851	0.00101528
													CASP8	ENSG00000064012	-0.597818	0.000105544
													CD9	ENSG00000010278	-0.610344	0.0331469
													NRP1	ENSG00000099250	-0.640788	0.00600567
													FYN	ENSG00000010810	-0.695471	0.000533906
													DDX58	ENSG00000107201	-0.69926	0.00128887
													IFIT1	ENSG00000185745	-0.706259	0.0230303
													CD55	ENSG00000196352	-0.77277	3.83831e-06
													STAT2	ENSG00000170581	-0.835463	0.0152381
													ATG10	ENSG00000152348	-0.849917	1.37868e-05
													IL13RA1	ENSG00000131724	-0.884355	4.14261e-06
													TLR4	ENSG00000136869	-0.912326	0.00163507
													PDGFC	ENSG00000145431	-0.996046	0.002558
													OAS3	ENSG00000111331	-1.01866	0.032372
													BMI1	ENSG00000168283	-1.02436	2.8144e-07
													C7	ENSG00000112936	-1.04592	0.000137375
													CDH1	ENSG00000039068	-1.05734	0.0127643
													IL4R	ENSG00000077238	-1.12535	0.0405106
													PPARG	ENSG00000132170	-1.20573	0.000130509
													THBS1	ENSG00000137801	-1.21201	0.0462731
													CD34	ENSG00000174059	-1.27138	0.00767848
													TNFSF10	ENSG00000121858	-1.27961	8.16292e-08
													FN1	ENSG00000115414	-1.317	0.00126429
													ISG15	ENSG00000187608	-1.40128	0.026718
													RUNX1	ENSG00000159216	-1.4147	0.0176892
													THY1	ENSG00000154096	-1.47174	0.0358916
													COL3A1	ENSG00000168542	-1.47529	0.000282865
													CFI	ENSG00000205403	-1.61844	4.21004e-06
													DPP4	ENSG00000197635	-3.48427	6.72894e-05
