# Supplementary material for: Metformin Abrogates Age-Associated Ovarian Fibrosis
Source: Oxford University Press journal article supplement (doi:10.1158/1078-0432.ccr-19-0603), 2019-10-09
Supplement: 10780432ccr190603-sup-217177_4_supp_5793582_py1fpl.xlsx [file 10780432ccr190603-sup-217177_4_supp_5793582_py1fpl.xlsx]

## Sheet: Januvia removed test
Probe Name	Accession #	Fibrotic vs. Non-fibrotic	P value of: Fibrotic vs. Non-fibrotic	Probe Name	Accession #	Fibrotic vs. metformin	P value of: Fibrotic vs. metformin	Probe Name	Accession #	metformin vs. Non-fibrotic	P value of: metformin vs. Non-fibrotic
EDC3	NM_001142443.1	-1.53	1.309e-05	CASP8	NM_001228.4	1.8	2.27e-06	CCL25	NM_005624.2	7.65	9.73e-06
MRPS5	NM_031902.3	1.19	4.597e-05	TUBB	NM_178014.2	1.53	0.0001015	TYK2	NM_003331.3	-1.31	1.222e-05
MAPKAPK2	NM_004759.3	1.71	4.642e-05	CD55	NM_000574.3	1.62	0.00012985	TUBB	NM_178014.2	-1.45	1.48e-05
AMMECR1L	NM_001199140.1	1.28	8.246e-05	FAS	NM_000043.3	1.57	0.00017376	CD55	NM_000574.3	-1.8	1.807e-05
MEF2C	NM_002397.3	1.48	0.00017912	TNFSF10	NM_003810.2	2.95	0.00022344	CFI	NM_000204.3	-3.14	1.998e-05
HLA-A	NM_002116.5	2.35	0.00020395	CD9	NM_001769.2	2.14	0.00023142	PSEN2	NM_000447.2	1.43	3.45e-05
DNAJC14	NM_032364.5	-2.17	0.00020466	TAB1	NM_153497.2	1.3	0.00032225	C9	NM_001737.3	10.57	3.525e-05
IKBKB	NM_001556.1	-1.62	0.00023114	RORA	NM_134261.2	-1.62	0.00037069	KLRC2	NM_002260.3	10.84	3.856e-05
MAPK1	NM_138957.2	-1.3	0.00025541	CFI	NM_000204.3	2.78	0.00087242	CD28	NM_001243078.1	6.07	7.305e-05
PSEN1	NM_000021.2	-1.15	0.00032391	PSEN2	NM_000447.2	-1.28	0.00094252	CFD	NM_001928.2	20.37	8.761e-05
CD207	NM_015717.2	6.06	0.00041555	DDX58	NM_014314.3	1.59	0.00128053	CCL1	NM_002981.1	11.15	8.958e-05
TRIM39	NM_021253.3	1.58	0.00047323	IL22	NM_020525.4	-2.04	0.00157682	IL24	NM_181339.1	6.98	0.00013397
TNFRSF10B	NM_003842.3	1.96	0.00048611	PRG2	NM_002728.4	-3.6	0.00215545	PPARG	NM_015869.3	-2.75	0.00013787
PSMB9	NM_002800.4	1.58	0.00082892	NFATC4	NM_001136022.2	1.41	0.00266596	FPR2	NM_001462.3	3.6	0.00015615
DUSP4	NM_057158.2	5.9	0.0008559	PSMB7	NM_002799.2	1.15	0.0027278	HPRT1	NM_000194.1	1.42	0.00016645
SF3A3	NM_006802.2	1.14	0.00096526	PPARG	NM_015869.3	1.84	0.00282859	IL1A	NM_000575.3	9.94	0.00016807
ATG7	NM_001136031.2	1.15	0.00097544	MYD88	NM_002468.3	-1.2	0.00282964	TLR9	NM_017442.2	1.78	0.00018047
STAT2	NM_005419.2	-2.25	0.00120285	MRPS5	NM_031902.3	1.18	0.002875	IRGM	NM_001145805.1	7.44	0.00019003
CCL1	NM_002981.1	5.21	0.00128462	TLR4	NM_138554.2	2.12	0.00341281	PTGDR2	NM_004778.1	3.86	0.00020825
IL24	NM_181339.1	3.78	0.00152071	IL13RA1	NM_001560.2	1.5	0.00357375	IL13RA1	NM_001560.2	-1.85	0.00021569
SAP130	NM_024545.3	1.29	0.00153676	MR1	NM_001531.2	-1.39	0.00367473	CCL13	NM_005408.2	8.87	0.00022255
ECSIT	NM_001142464.2	1.26	0.00160517	IL1B	NM_000576.2	-3.43	0.00380705	GATA3	NM_001002295.1	9.26	0.00023471
C8G	NM_000606.2	2.59	0.00162364	CDH1	NM_004360.2	2.41	0.00393378	CT45A1	NM_001017417.1	4.62	0.00024808
LGALS3	NM_001177388.1	-1.3	0.00166912	C6	NM_000065.2	-1.79	0.00402562	CTAGE1	NM_172241.2	2.99	0.00027162
MAP2K1	NM_002755.2	1.26	0.00167538	IL6R	NM_000565.2	1.53	0.00406567	LRRN3	NM_001099660.1	2.45	0.00030209
KLRC2	NM_002260.3	5.58	0.00177139	TLR5	NM_003268.3	-1.72	0.00410986	C8A	NM_000562.2	7.18	0.00033534
GPATCH3	NM_022078.2	-1.89	0.00177432	CXCL5	NM_002994.3	-2.27	0.00434485	KLRC1	NM_002259.3	2.71	0.00034563
CEACAM6	NM_002483.4	5.09	0.00177735	TLR9	NM_017442.2	-1.55	0.00438814	ULBP2	NM_025217.2	4.5	0.0003579
CD8B	NM_004931.3	4.44	0.00204603	COL3A1	NM_000090.3	1.9	0.00440443	CXCR2	NM_001557.2	8.09	0.00036403
TFE3	NM_006521.3	1.2	0.00207213	C5	NM_001735.2	-1.38	0.00455252	MR1	NM_001531.2	1.61	0.00037698
RPS6	NM_001010.2	1.41	0.00210674	JAK3	NM_000215.2	-1.4	0.0048125	ATG10	NM_001131028.1	-1.67	0.00039058
PIN1	NM_006221.2	-1.37	0.00222207	DOCK9	NM_001130048.1	-1.2	0.00496461	TNFRSF18	NM_004195.2	5.36	0.00040201
DDX50	NM_024045.1	1.22	0.00268673	HMGB1	NM_002128.4	1.14	0.00519765	TLR5	NM_003268.3	1.76	0.00041218
TAB1	NM_153497.2	1.15	0.00269037	LRRN3	NM_001099660.1	-1.65	0.00545099	CD207	NM_015717.2	8.79	0.00043524
CCL22	NM_002990.3	5.73	0.00282134	IL4R	NM_000418.2	3.12	0.00582745	MAP3K5	NM_005923.3	1.24	0.00044088
ATG10	NM_001131028.1	-1.36	0.00290454	BMI1	NM_005180.5	1.55	0.00600077	CD83	NM_004233.3	2.98	0.00045175
IL18RAP	NM_003853.2	4.94	0.00312603	TNFSF15	NM_001204344.1	-3.42	0.00601636	DUSP4	NM_057158.2	7.72	0.00047843
GZMB	NM_004131.3	6.69	0.00315981	APOE	NM_000041.2	-3.26	0.00627951	CD9	NM_001769.2	-2.06	0.00049999
IL12RB2	NM_001559.2	4.92	0.00321813	IFNAR2	NM_000874.3	1.36	0.00641545	CCR3	NM_001837.2	7.7	0.0005114
CT45A1	NM_001017417.1	2.83	0.00326445	VEGFA	NM_001025366.1	-1.54	0.00649119	COL3A1	NM_000090.3	-3.27	0.00052056
AGK	NM_018238.3	1.23	0.00337699	MNX1	NM_005515.3	-4.5	0.00679192	AMBP	NM_001633.3	4.13	0.00052716
BAX	NM_138761.3	1.26	0.00349172	FYN	NM_002037.3	1.6	0.00687804	CD70	NM_001252.2	9.1	0.00054393
TLK2	NM_006852.2	1.15	0.00356748	CD244	NM_016382.2	-8.02	0.00699851	CC2D1B	NM_032449.2	2.03	0.00057665
CD58	NM_001779.2	1.6	0.00373288	CXCR1	NM_000634.2	-1.82	0.00715122	BMI1	NM_005180.5	-2.07	0.00058014
IL3	NM_000588.3	3.12	0.00386717	TGFB2	NM_003238.2	1.79	0.00755518	CASP8	NM_001228.4	-1.51	0.00058448
CREBBP	NM_004380.2	1.41	0.00387184	CCL25	NM_005624.2	-4.25	0.00821585	FUT5	NM_002034.2	5.28	0.00058903
MAGEA3	NM_005362.3	4.24	0.00388995	CD80	NM_005191.3	-2.21	0.00876269	IFNL2	NM_172138.1	8.3	0.00059882
IL25	NM_022789.2	3.85	0.00404705	TYK2	NM_003331.3	1.2	0.00931518	C7	NM_000587.2	-2.05	0.00062106
IL1RL1	NM_016232.4	4.38	0.00426805	LGALS3	NM_001177388.1	-1.29	0.00932225	IL18RAP	NM_003853.2	7.93	0.00062235
ITGAL	NM_002209.2	2.51	0.0046019	IL1R2	NM_173343.1	-2.46	0.00950429	PDGFC	NM_016205.2	-2.25	0.00062272
IL23A	NM_016584.2	4.45	0.00474148	IFI16	NM_005531.1	1.42	0.0102963	IL22	NM_020525.4	8.62	0.00067532
AMBP	NM_001633.3	3.06	0.00487556	RUNX1	NM_001754.4	2.03	0.0103856	CCL19	NM_006274.2	7.52	0.00067751
PRKCD	NM_006254.3	-1.51	0.00488111	SOCS1	NM_003745.1	-3.51	0.010721	APOE	NM_000041.2	5.7	0.00072822
XCL2	NM_003175.3	5.02	0.00530001	PRKCE	NM_005400.2	1.33	0.0107774	CD1E	NM_001042583.1	4.43	0.00074809
ERCC3	NM_000122.1	-1.33	0.00532376	C9	NM_001737.3	-3.54	0.0108698	C5	NM_001735.2	1.52	0.00080214
TNFRSF17	NM_001192.2	3.63	0.00532575	PSMB9	NM_002800.4	1.47	0.0114098	TNFSF10	NM_003810.2	-2.37	0.00082934
TMUB2	NM_024107.2	-1.32	0.00539842	NOTCH1	NM_017617.3	-1.64	0.0114999	CD8B	NM_004931.3	5.66	0.00084266
PRF1	NM_005041.3	2.76	0.00543803	CD28	NM_001243078.1	-3.94	0.0115938	TREM1	NM_018643.3	11.42	0.00087181
BMI1	NM_005180.5	-1.33	0.00548149	BST1	NM_004334.2	1.36	0.011618	CSF2RB	NM_000395.2	2.83	0.00089519
KLRK1	NM_007360.3	5.68	0.00558345	ITGA2B	NM_000419.3	-1.64	0.0122671	TAL1	NM_003189.2	7.47	0.00091751
PVR	NM_006505.3	1.42	0.00599984	BAX	NM_138761.3	1.34	0.0127669	BST1	NM_004334.2	-1.47	0.00093742
IL22	NM_020525.4	4.23	0.00609145	CTAGE1	NM_172241.2	-2.53	0.0134484	C8G	NM_000606.2	2.77	0.001028
ZKSCAN5	NM_014569.3	-1.37	0.00675908	IL7	NM_000880.2	-2.25	0.0135416	ROPN1	NM_017578.2	3.21	0.00106813
TNFRSF18	NM_004195.2	3	0.00695081	NRP1	NM_003873.5	1.78	0.0137275	IFNA7	NM_021057.2	2.81	0.00106962
MAGEA12	NM_001166386.1	3.04	0.00699829	CD83	NM_004233.3	-1.91	0.013792	IL23R	NM_144701.2	5.12	0.00107744
CD1A	NM_001763.2	4.24	0.00723457	LAIR2	NM_002288.3	-1.67	0.0141044	KIR2DS1	NM_014512.1	7.72	0.00108381
CCL19	NM_006274.2	4.08	0.00772379	LY96	NM_015364.2	1.25	0.0146582	ISG20	NM_002201.4	2.32	0.00112146
CTCFL	NM_001269042.1	3.94	0.00775262	CD164	NM_006016.4	-1.2	0.0150687	GZMB	NM_004131.3	8.25	0.00116039
IL22RA1	NM_021258.2	2.81	0.00783956	CT45A1	NM_001017417.1	-1.64	0.0161861	S100A12	NM_005621.1	6.97	0.00117906
SMAD2	NM_005901.5	1.21	0.00812729	SLC11A1	NM_000578.2	-2.91	0.0162483	IFNB1	NM_002176.2	6.41	0.00121162
IGF2R	NM_000876.1	-1.3	0.00837108	ZNF205	NM_001031686.1	1.72	0.0162978	KIR3DL2	NM_006737.2	6.84	0.00122276
GATA3	NM_001002295.1	3.98	0.00875411	VCAM1	NM_001078.3	-1.64	0.0164446	IL1R2	NM_173343.1	6.55	0.00127751
CD70	NM_001252.2	4.29	0.00879411	IFNA7	NM_021057.2	-1.64	0.0168749	JAK2	NM_004972.2	-1.28	0.00131245
IKBKG	NM_003639.2	-1.27	0.00905758	CCL1	NM_002981.1	-2.14	0.0169987	LAIR2	NM_002288.3	1.82	0.00141096
KIR2DS1	NM_014512.1	4.51	0.00911542	CD200	NM_005944.5	1.86	0.0175	CSF3	NM_000759.3	5.37	0.00142194
SPO11	NM_198265.1	3.35	0.00940019	CCR3	NM_001837.2	-2.41	0.0175932	LCN2	NM_005564.3	4.83	0.0014522
CD38	NM_001775.2	4.39	0.00940086	F12	NM_000505.3	-4.83	0.0181372	IL5	NM_000879.2	8.7	0.00149471
LRP1	NM_002332.2	1.25	0.00940653	TAL1	NM_003189.2	-2.38	0.0183378	PSMB7	NM_002799.2	-1.17	0.00151834
ABL1	NM_005157.3	-1.34	0.00959618	TNFSF14	NM_003807.3	6.11	0.018825	KLRF1	NM_016523.1	3.96	0.00152938
PDCD1	NM_005018.1	3.99	0.00960479	ISG20	NM_002201.4	-1.77	0.0189462	ADA	NM_000022.2	2.21	0.0015628
TIGIT	NM_173799.2	4.72	0.00985614	ANP32B	NM_006401.2	-1.17	0.019658	IL13	NM_002188.2	6.05	0.00158022
CD247	NM_198053.1	4.26	0.0104644	PDGFC	NM_016205.2	1.67	0.0197262	PRG2	NM_002728.4	4.8	0.00161121
ATF2	NM_001256090.1	1.1	0.0104777	CCL21	NM_002989.2	3.01	0.0198129	CD1A	NM_001763.2	6.18	0.00163659
IL2	NM_000586.2	3.28	0.0106622	FLT3LG	NM_001459.3	1.15	0.019824	OSM	NM_020530.4	2.4	0.0017076
LCN2	NM_005564.3	3.71	0.0107502	MICA	NM_000247.1	-1.47	0.0198636	TNFRSF9	NM_001561.4	4.49	0.00171999
MST1R	NM_002447.1	1.78	0.0109304	CCL26	NM_006072.4	-2.21	0.0208744	CCL16	NM_004590.2	6.45	0.00175644
UBC	NM_021009.3	-1.6	0.011037	ZNF346	NM_012279.2	1.18	0.0218453	MAGEC2	NM_016249.3	5.75	0.0017635
MASP2	NM_139208.1	3.78	0.0111311	APP	NM_000484.3	1.56	0.0218923	IL5RA	NM_000564.3	3.78	0.00183913
CXCR3	NM_001504.1	3.47	0.011304	ARG2	NM_001172.3	-10.03	0.0222369	SH2D1B	NM_053282.4	5.17	0.00185145
CCL16	NM_004590.2	3.83	0.0113387	ARG1	NM_000045.2	-2.51	0.0222435	DEFB1	NM_005218.3	2.81	0.00187709
CD1E	NM_001042583.1	2.54	0.0114849	SPANXB1	NM_032461.2	-5.31	0.0230422	SPACA3	NM_173847.3	5.19	0.00193569
BCL2	NM_000657.2	1.5	0.0115487	CASP3	NM_032991.2	-1.2	0.0232463	CARD9	NM_052813.4	1.83	0.00194544
GTF3C1	NM_001520.3	-1.17	0.0122049	IL13	NM_002188.2	-1.9	0.0235848	GZMM	NM_005317.2	7.01	0.00196768
CD79B	NM_021602.2	2.7	0.0127017	MAPK3	NM_001040056.1	1.17	0.0236055	PDCD1	NM_005018.1	5.06	0.00210601
KIR3DL2	NM_006737.2	4.09	0.0130875	TNFRSF9	NM_001561.4	-3.08	0.0239042	RUNX1	NM_001754.4	-4.06	0.00212729
SPACA3	NM_173847.3	3.23	0.0138671	FN1	NM_212482.1	1.95	0.024869	IL15	NM_172174.1	1.84	0.00214218
ITGB4	NM_001005731.1	2.7	0.0139739	TREM1	NM_018643.3	-2.76	0.0251234	MEFV	NM_000243.2	5.92	0.00219152
ROPN1	NM_017578.2	2.2	0.0140913	IL23R	NM_144701.2	-1.99	0.0251811	MASP2	NM_139208.1	4.72	0.00221285
MAGEC2	NM_016249.3	3.81	0.0141275	RAG1	NM_000448.2	-1.67	0.0254434	XCL2	NM_003175.3	6.61	0.0022522
ABCB1	NM_000927.3	1.33	0.0143339	S100A12	NM_005621.1	-2.5	0.0255816	CCL22	NM_002990.3	5.92	0.0023412
MAPK11	NM_002751.5	-1.44	0.0146043	LAMP1	NM_005561.3	1.32	0.0256789	IFNA8	NM_002170.3	9.48	0.0024599
KIR3DL3	NM_153443.3	3.91	0.0148129	CD1E	NM_001042583.1	-1.75	0.0257562	ICOSLG	NM_015259.4	3.15	0.00247263
CCL11	NM_002986.2	3.13	0.0162212	OSM	NM_020530.4	-2.08	0.0258341	CCL18	NM_002988.2	7.64	0.00249355
SH2B2	NM_020979.3	1.41	0.0171803	SH2D1B	NM_053282.4	-2.11	0.0258692	SLC11A1	NM_000578.2	2.5	0.00251273
DDX43	NM_018665.2	2.47	0.0181383	ITCH	NM_001257138.1	-1.1	0.0261818	IRF4	NM_002460.1	4.43	0.00253964
IL13	NM_002188.2	3.18	0.0185931	BLNK	NM_013314.2	-3.3	0.0263979	SDHA	NM_004168.1	1.25	0.00255685
CD274	NM_014143.3	1.83	0.018734	BTK	NM_000061.1	-1.47	0.0269135	CD80	NM_005191.3	6.33	0.0026093
IL5RA	NM_000564.3	2.55	0.0189864	MAGEA4	NM_001011548.1	-3.82	0.0271424	MNX1	NM_005515.3	3.97	0.00262579
TIRAP	NM_148910.2	-1.23	0.0190908	TBP	NM_001172085.1	1.14	0.0271591	CCL7	NM_006273.2	-1.89	0.00263342
IL12B	NM_002187.2	3.83	0.0192587	DPP4	NM_001935.3	3.58	0.027462	TLR4	NM_138554.2	-2.1	0.00266142
CCR3	NM_001837.2	3.19	0.0193515	C8A	NM_000562.2	-2.6	0.0278078	FUT7	NM_004479.3	3.76	0.00278373
CSF2RB	NM_000395.2	2.06	0.0197986	IL17F	NM_052872.3	-2.43	0.0282808	THY1	NM_006288.2	-4.43	0.00279267
ATG5	NM_004849.2	-1.15	0.0203109	COLEC12	NM_130386.2	2.08	0.0288857	FN1	NM_212482.1	-3.07	0.00282984
C7	NM_000587.2	-1.56	0.0208924	GATA3	NM_001002295.1	-2.33	0.029316	IL1RL1	NM_016232.4	4.66	0.00283588
LIF	NM_002309.3	5.29	0.0209551	ATM	NM_000051.3	-2.31	0.0293514	ARG1	NM_000045.2	6.36	0.00290967
ULBP2	NM_025217.2	2.6	0.0210904	MAPK14	NM_001315.1	-1.12	0.0297973	RORA	NM_134261.2	1.47	0.0029197
CNOT10	NM_001256741.1	1.16	0.0217325	TBK1	NM_013254.2	-1.33	0.030058	IFI16	NM_005531.1	-1.28	0.00295961
CCL17	NM_002987.2	3.48	0.0217811	THBD	NM_000361.2	2.09	0.0302345	PRF1	NM_005041.3	2.63	0.00296286
TLR10	NM_030956.2	3.73	0.0218357	KLRD1	NM_002262.3	3.86	0.0307249	TFEB	NM_007162.2	1.47	0.00301014
IFNL2	NM_172138.1	3.62	0.0219567	IL32	NM_004221.4	2.2	0.0307761	LTK	NM_001135685.1	4.44	0.00305817
CCR6	NM_031409.2	1.81	0.0223894	PLA2G6	NM_001004426.1	1.21	0.0310079	KLRK1	NM_007360.3	5.87	0.00310429
TCF7	NM_003202.2	1.44	0.0224954	IL17RB	NM_018725.3	-3.11	0.0311018	IL2	NM_000586.2	7.3	0.00318036
GZMK	NM_002104.2	4.01	0.0230263	IFNA2	NM_000605.3	-2.42	0.0313318	IFNA17	NM_021268.2	4.79	0.00322119
GZMM	NM_005317.2	3.69	0.0233135	CXCR2	NM_001557.2	-2.77	0.0315571	LTF	NM_002343.2	4.55	0.00323347
JAK2	NM_004972.2	-1.2	0.0234349	IFITM1	NM_003641.3	-1.48	0.0316676	CD38	NM_001775.2	5.14	0.00330228
CC2D1B	NM_032449.2	1.55	0.0241313	NFATC3	NM_004555.2	-1.16	0.0318815	PMCH	NM_002674.2	3.9	0.00334413
CD34	NM_001025109.1	-2.15	0.0244759	CARD9	NM_052813.4	-1.61	0.0321138	ITK	NM_005546.3	5.53	0.00335698
ZAP70	NM_001079.3	1.99	0.02452	ANXA1	NM_000700.1	1.65	0.0324255	CD247	NM_198053.1	5.65	0.00345745
ITGA5	NM_002205.2	1.43	0.0247072	ADORA2A	NM_000675.3	-1.55	0.0325309	IL21	NM_021803.2	6.15	0.00359673
TBX21	NM_013351.1	1.79	0.0248194	MEFV	NM_000243.2	-2.43	0.0327306	CXCL5	NM_002994.3	4.4	0.00363069
ITGAE	NM_002208.4	1.18	0.0252769	IL1A	NM_000575.3	-3.67	0.0327338	THBS1	NM_003246.2	-3.27	0.00374264
CXCL16	NM_001100812.1	-1.58	0.0253833	FPR2	NM_001462.3	-2.24	0.0328509	LILRA5	NM_181879.2	5.4	0.00374535
IL2RB	NM_000878.2	3.15	0.0254753	C3	NM_000064.2	4.15	0.0333984	TNFSF15	NM_001204344.1	4.68	0.00379808
TREM1	NM_018643.3	4.13	0.0266248	TNFRSF18	NM_004195.2	-1.79	0.0338161	SH2B2	NM_020979.3	1.5	0.00388524
TPTE	NM_199259.2	2.81	0.0266959	FUT5	NM_002034.2	-2.39	0.0346084	CASP10	NM_032977.3	1.7	0.00397215
CCL18	NM_002988.2	3.84	0.0267835	CHUK	NM_001278.3	-1.22	0.0346314	VEGFA	NM_001025366.1	1.67	0.00400393
CD48	NM_001778.2	3.32	0.0271951	PBK	NM_018492.2	-2.36	0.0348478	MAGEA3	NM_005362.3	4.96	0.0041575
C1QBP	NM_001212.3	1.17	0.0272404	CCR4	NM_005508.4	-2.1	0.0349982	IL17F	NM_052872.3	6.84	0.00426362
SEMG1	NM_003007.2	2.27	0.0274481	IRF2	NM_002199.3	-1.28	0.0360785	CRP	NM_000567.2	5.61	0.00429494
IL5	NM_000879.2	3.86	0.0274992	ITGB4	NM_001005731.1	2.15	0.0362366	IL23A	NM_016584.2	4.59	0.00435166
LRRN3	NM_001099660.1	1.48	0.0275072	IL21R	NM_021798.2	-2.78	0.0363219	F12	NM_000505.3	5.8	0.00448436
DOCK9	NM_001130048.1	-1.35	0.0281598	CCL13	NM_005408.2	-2.71	0.0366795	IL7	NM_000880.2	3.08	0.00453345
TAL1	NM_003189.2	3.14	0.029296	CFD	NM_001928.2	-4.68	0.0369195	CD180	NM_005582.2	2.72	0.00468163
NOD1	NM_006092.1	1.2	0.0293765	CLEC7A	NM_197954.2	-1.63	0.036965	AIRE	NM_000383.2	4.4	0.0048178
AXL	NM_021913.2	-1.36	0.0293876	BCL2	NM_000657.2	1.42	0.0377153	ATM	NM_000051.3	2.35	0.00523456
CX3CR1	NM_001337.3	-1.31	0.0294056	IL26	NM_018402.1	-1.99	0.0377339	FOXP3	NM_014009.3	3.35	0.00524203
SLAMF6	NM_001184714.1	2.18	0.029476	IGF1R	NM_000875.2	1.29	0.0385604	TNFRSF13C	NM_052945.3	4.57	0.0053657
CD79A	NM_001783.3	2.53	0.0301832	CD70	NM_001252.2	-2.12	0.0393778	RIPK2	NM_003821.5	1.33	0.00537489
IL15	NM_172174.1	1.47	0.0303448	IL2RA	NM_000417.1	-1.89	0.0394031	LY9	NM_001033667.1	4.69	0.00546497
ICOSLG	NM_015259.4	2.37	0.0304064	TRAF2	NM_021138.3	1.22	0.0394269	CCR9	NM_031200.1	5.33	0.00556496
TBK1	NM_013254.2	-1.18	0.0308231	LTK	NM_001135685.1	-2.14	0.0397099	IL11RA	NM_147162.1	-1.27	0.00564348
IRGM	NM_001145805.1	3.19	0.0309169	DNAJC14	NM_032364.5	-1.81	0.0402977	IGF2R	NM_000876.1	-1.32	0.0056842
IL23R	NM_144701.2	2.58	0.0309901	CR1	NM_000651.4	-1.86	0.0413153	TNFRSF17	NM_001192.2	4.88	0.00571479
MIF	NM_002415.1	1.33	0.0311074	IRF8	NM_002163.2	-1.59	0.041489	MAGEB2	NM_002364.4	3.95	0.00573819
CD163	NM_004244.4	1.63	0.0312309	ECSIT	NM_001142464.2	1.33	0.0415036	CD24	NM_013230.2	3.36	0.00575649
LAMP2	NM_001122606.1	-1.25	0.0313377	ATG10	NM_001131028.1	1.23	0.0419741	IL12B	NM_002187.2	6.09	0.00585106
SELE	NM_000450.2	3.87	0.0317149	IL5	NM_000879.2	-2.25	0.0421333	TIGIT	NM_173799.2	5.57	0.005907
CXCL10	NM_001565.1	3.19	0.0327857	PSMB8	NM_004159.4	1.27	0.0426252	MAGEA4	NM_001011548.1	4.53	0.00595847
LILRA5	NM_181879.2	3.08	0.0327979	POU2AF1	NM_006235.2	-2.12	0.0427562	CCR6	NM_031409.2	1.91	0.00601643
C9	NM_001737.3	2.98	0.0328138	CTSG	NM_001911.2	-2.38	0.0428217	CXCR3	NM_001504.1	3.88	0.00603508
LTF	NM_002343.2	3	0.032832	SDHA	NM_004168.1	-1.15	0.0428579	CTSG	NM_001911.2	5.24	0.00614578
CCL27	NM_006664.2	2.11	0.0329931	DEFB1	NM_005218.3	-2.69	0.0428956	CXCL9	NM_002416.1	3.13	0.00618978
LILRB2	NM_005874.1	-1.85	0.0332556	TREM2	NM_018965.3	-1.52	0.0434614	PBK	NM_018492.2	4.97	0.006395
FOXJ1	NM_001454.3	-2.87	0.033322	IRF4	NM_002460.1	-2.28	0.0437199	TARP	NM_001003799.1	3.95	0.00643033
CCL13	NM_005408.2	3.28	0.0337014	IRF7	NM_001572.3	1.38	0.0439471	DPP4	NM_001935.3	-5.65	0.00646212
IFNB1	NM_002176.2	3.12	0.0338316	ITGA1	NM_181501.1	1.43	0.0440521	CXCR1	NM_000634.2	1.99	0.00648836
IFNA8	NM_002170.3	3.94	0.0347692	PSMD7	NM_002811.3	1.07	0.0441081	KIR3DL3	NM_153443.3	5.19	0.00649999
CXCL14	NM_004887.4	3.73	0.035125	IL21	NM_021803.2	-2.36	0.0443492	CHUK	NM_001278.3	1.36	0.00653095
CXCL9	NM_002416.1	3.18	0.0357236	IFNL2	NM_172138.1	-2.29	0.0455709	IL26	NM_018402.1	2.01	0.00659015
CD3D	NM_000732.4	2.28	0.0357355	TNFRSF10C	NM_003841.3	-1.94	0.0458365	IL3	NM_000588.3	4.35	0.00665908
FOXP3	NM_014009.3	2.31	0.0365722	CD6	NM_006725.3	-2.03	0.046344	CD86	NM_175862.3	3.35	0.00672073
PPARG	NM_015869.3	-1.49	0.037795	IL6ST	NM_002184.2	1.19	0.0468271	ICAM4	NM_001039132.1	4.14	0.00676208
FAS	NM_000043.3	1.25	0.0378034	ABL1	NM_005157.3	-1.05	0.0478775	CR1	NM_000651.4	2.18	0.0068422
CEACAM1	NM_001712.3	2.62	0.0380972	TNFRSF13C	NM_052945.3	-1.94	0.0478853	IL1B	NM_000576.2	6.6	0.00693381
C8A	NM_000562.2	2.76	0.0383058	MCAM	NM_006500.2	1.97	0.0484772	TNFSF12	NM_003809.2	-1.23	0.00701739
ZNF346	NM_012279.2	1.17	0.0388144	LILRA5	NM_181879.2	-1.76	0.048821	CD58	NM_001779.2	1.87	0.0070368
NFATC4	NM_001136022.2	1.2	0.0390708	THY1	NM_006288.2	1.96	0.0496209	IL2RB	NM_000878.2	4.09	0.00708919
ICOS	NM_012092.2	3.93	0.0391916	CD86	NM_175862.3	-1.57	0.050735	IL21R	NM_021798.2	4.66	0.00753287
CSF1R	NM_005211.2	1.78	0.0395252	TNFSF12	NM_003809.2	1.09	0.050804	RRAD	NM_004165.1	1.9	0.00768938
CYFIP2	NM_001037332.2	1.44	0.0397549	CSF1	NM_000757.4	-1.36	0.0511384	NEFL	NM_006158.3	3.24	0.00784742
GNLY	NM_006433.2	4.77	0.0399457	PMCH	NM_002674.2	-1.76	0.0525485	TICAM2	NM_021649.4	1.45	0.00787736
IFNA17	NM_021268.2	2.93	0.041132	CLU	NM_001831.2	-1.95	0.0525899	ILF3	NM_001137673.1	-1.27	0.00799784
ATG16L1	NM_198890.2	1.2	0.0426739	CCL18	NM_002988.2	-1.99	0.0536115	TNFRSF10C	NM_003841.3	3.46	0.00808085
PTGDR2	NM_004778.1	2.11	0.0428376	CCL19	NM_006274.2	-1.84	0.055248	SOCS1	NM_003745.1	3.41	0.00816333
MAGEB2	NM_002364.4	2.35	0.042842	ICAM2	NM_000873.3	1.21	0.05528	TCF7	NM_003202.2	1.52	0.00817037
CLEC4C	NM_203503.1	-3.23	0.0432393	ATF2	NM_001256090.1	1.07	0.0554658	NOTCH1	NM_017617.3	1.47	0.00847567
IL6R	NM_000565.2	1.25	0.0434059	FCGR1A	NM_000566.3	-2.76	0.0557243	ITCH	NM_001257138.1	1.13	0.00857858
CD83	NM_004233.3	1.56	0.0437708	STAT1	NM_007315.2	1.35	0.0558956	CCL17	NM_002987.2	4.98	0.0087637
CSF3	NM_000759.3	2.68	0.0452966	PAX5	NM_016734.1	-2.06	0.0581437	IL4R	NM_000418.2	-3.09	0.00904872
BCL10	NM_003921.2	1.14	0.0455051	TP53	NM_000546.2	1.2	0.0584951	TP53	NM_000546.2	-1.24	0.00951191
CD80	NM_005191.3	2.86	0.0456756	CD3EAP	NM_012099.1	1.31	0.0587766	CDH1	NM_004360.2	-2.23	0.00961639
BAGE	NM_001187.1	1.91	0.0458651	CTAG1B	NM_001327.2	-2.06	0.0588138	SSX4	NM_005636.3	8.29	0.00971808
ZNF205	NM_001031686.1	1.27	0.0467254	NOD2	NM_022162.1	-2.08	0.0589064	POU2AF1	NM_006235.2	3.99	0.00983167
TNFSF8	NM_001244.3	1.86	0.0469868	ITGA4	NM_000885.4	-1.51	0.0591511	CD274	NM_014143.3	2.01	0.00997679
LTBR	NM_002342.1	1.2	0.0473085	RRAD	NM_004165.1	-2.99	0.0592694	CCR2	NM_001123041.2	2.57	0.0102156
IL1R2	NM_173343.1	2.66	0.0477892	CKLF	NM_181640.2	-1.14	0.0604958	LTA	NM_000595.2	2.12	0.011139
CD24	NM_013230.2	2.52	0.0479246	SERPING1	NM_000062.2	1.26	0.0614057	ICOS	NM_012092.2	5.85	0.0112039
CXCL2	NM_002089.3	5.09	0.0491696	MAP4K2	NM_004579.2	1.26	0.0617478	PLA2G6	NM_001004426.1	-1.33	0.0117242
PMCH	NM_002674.2	2.22	0.0496624	LYN	NM_002350.1	-2.14	0.0619636	TLR10	NM_030956.2	4.29	0.0117549
COL3A1	NM_000090.3	-1.73	0.0502976	LILRB2	NM_005874.1	-2.58	0.0622999	CEACAM6	NM_002483.4	7.49	0.0118665
RORC	NM_001001523.1	4.23	0.0508162	CSF3R	NM_156038.2	-2.75	0.0623266	TNFRSF1A	NM_001065.2	-1.34	0.0122991
ADA	NM_000022.2	1.76	0.0508416	ATG7	NM_001136031.2	1.18	0.0625749	DDX58	NM_014314.3	-1.52	0.0123378
CXCR2	NM_001557.2	2.92	0.050943	SYT17	NM_016524.2	-2.39	0.0627622	CEACAM8	NM_001816.3	3.32	0.0125707
MICA	NM_000247.1	-1.32	0.0516214	CD97	NM_078481.2	1.6	0.0631672	CD6	NM_006725.3	2.19	0.0127648
ICAM4	NM_001039132.1	2.77	0.0523836	IL24	NM_181339.1	-1.85	0.0633149	SYCP1	NM_003176.2	2.81	0.0128443
LY9	NM_001033667.1	2.81	0.0523898	FLT3	NM_004119.1	-3.22	0.0635386	CYLD	NM_015247.1	1.09	0.0130311
ILF3	NM_001137673.1	-1.13	0.0531567	PTGS2	NM_000963.1	-2.41	0.0635585	CD34	NM_001025109.1	-2.61	0.0130994
IFNA7	NM_021057.2	1.71	0.0533864	PPIA	NM_021130.2	-1.18	0.0636384	BTLA	NM_181780.2	2.63	0.0131442
PLAUR	NM_001005376.1	-1.61	0.0538362	FCF1	NM_015962.4	1.09	0.0650475	TNFSF4	NM_003326.2	-1.4	0.0132072
S100A12	NM_005621.1	2.79	0.0538628	IL18RAP	NM_003853.2	-1.61	0.0654439	XCR1	NM_005283.2	1.99	0.0133134
LYN	NM_002350.1	-2.19	0.0545303	IL18R1	NM_003855.2	-1.94	0.0659935	CD276	NM_001024736.1	-1.4	0.013603
SSX4	NM_005636.3	2.9	0.0549767	ZNF143	NM_003442.5	-1.2	0.0665956	CASP3	NM_032991.2	1.17	0.0137358
IFIT1	NM_001548.3	-1.54	0.0553549	CCR9	NM_031200.1	-2.36	0.0669541	CTCFL	NM_001269042.1	4.4	0.0140448
SH2D1B	NM_053282.4	2.45	0.0556319	SPACA3	NM_173847.3	-1.61	0.067018	CCL20	NM_004591.1	1.97	0.0142477
TFEB	NM_007162.2	1.26	0.055837	LTBR	NM_002342.1	1.31	0.0676129	FCGR1A	NM_000566.3	4.18	0.014286
KLRF1	NM_016523.1	2.05	0.0561928	TLR1	NM_003263.3	1.16	0.0682158	SELL	NR_029467.1	2.76	0.0143089
APOE	NM_000041.2	1.75	0.0565237	CD96	NM_005816.4	4.43	0.0698901	CD1C	NM_001765.2	2.73	0.0143363
CFD	NM_001928.2	4.36	0.058105	C8B	NM_000066.2	-2.19	0.0703198	MAP3K7	NM_145333.1	-1.06	0.0145122
FADD	NM_003824.2	1.26	0.0583036	SMPD3	NM_018667.3	2.35	0.0704506	NUBP1	NM_001278506.1	1.21	0.0146583
CCR1	NM_001295.2	2.07	0.058313	CCL8	NM_005623.2	-1.6	0.0708666	CDKN1A	NM_000389.2	3.17	0.0147517
AIRE	NM_000383.2	2.56	0.0586856	CRP	NM_000567.2	-2.15	0.0710518	HAVCR2	NM_032782.3	1.58	0.0147539
TNFSF10	NM_003810.2	1.24	0.059025	IL1RL2	NM_003854.2	-2.74	0.0717279	IL25	NM_022789.2	5.72	0.0152386
RELB	NM_006509.2	1.5	0.0591177	FUT7	NM_004479.3	-1.94	0.0725361	MAGEC1	NM_005462.4	4.38	0.0154262
IRF4	NM_002460.1	1.94	0.0592124	GZMM	NM_005317.2	-1.9	0.0727428	CCL27	NM_006664.2	2.33	0.01544
SMPD3	NM_018667.3	2.49	0.0606848	TNFRSF1A	NM_001065.2	1.18	0.072996	STAT2	NM_005419.2	-2.13	0.0154404
GZMA	NM_006144.2	2.25	0.0608175	CC2D1B	NM_032449.2	-1.31	0.0730066	LTB	NM_002341.1	2.21	0.0154961
ISG15	NM_005101.3	-2.32	0.0608362	KLRF1	NM_016523.1	-1.94	0.0733134	CD160	NM_007053.2	3.74	0.0155439
IL4	NM_000589.2	2.54	0.0618715	CYLD	NM_015247.1	-1.06	0.0737328	MS4A1	NM_152866.2	4.11	0.0160092
LAMP3	NM_014398.3	2.8	0.0620912	NFKB1	NM_003998.2	-1.26	0.0737914	IL2RA	NM_000417.1	3.63	0.0160674
THBS1	NM_003246.2	-2.06	0.0625774	CASP10	NM_032977.3	-1.31	0.0743585	PAX5	NM_016734.1	3.42	0.0160788
MR1	NM_001531.2	1.15	0.062995	IRGM	NM_001145805.1	-2.33	0.0745956	FAS	NM_000043.3	-1.26	0.0169938
CD86	NM_175862.3	2.14	0.0631542	TAPBP	NM_003190.4	1.18	0.0749821	PVR	NM_006505.3	1.33	0.0172232
KLRB1	NM_002258.2	3.22	0.063453	MTMR14	NM_022485.3	1.07	0.0750243	DDX50	NM_024045.1	1.18	0.0172295
CD4	NM_000616.4	-1.89	0.0636034	PLAUR	NM_001005376.1	-1.5	0.0753794	CXCL10	NM_001565.1	4.3	0.0178382
CASP8	NM_001228.4	1.19	0.0640566	TFEB	NM_007162.2	-1.18	0.0755751	IL1RN	NM_000577.3	4.1	0.0180097
CHUK	NM_001278.3	1.11	0.0642157	EWSR1	NM_013986.3	1.17	0.076404	GPATCH3	NM_022078.2	-1.82	0.0183402
TNFSF13	NM_003808.3	1.23	0.065892	PTGDR2	NM_004778.1	-1.83	0.0779775	CD3G	NM_000073.2	3.45	0.0188442
CD8A	NM_001768.5	2.36	0.0668813	IFNB1	NM_002176.2	-2.06	0.0803773	CTSW	NM_001335.3	2.81	0.0188732
APP	NM_000484.3	1.24	0.066972	CCL20	NM_004591.1	-1.68	0.0805411	NLRC5	NM_032206.4	1.43	0.0189489
BCL2L1	NM_001191.2	1.12	0.0674167	TGFB1	NM_000660.3	-1.29	0.0808389	TAB1	NM_153497.2	-1.13	0.0189924
POLR2A	NM_000937.2	-1.12	0.0683771	S100A8	NM_002964.3	-4.15	0.080941	BAGE	NM_001187.1	1.82	0.0191678
CXCR6	NM_006564.1	1.9	0.0685802	CCL16	NM_004590.2	-1.68	0.081177	TPTE	NM_199259.2	2.98	0.0193943
HLA-DRB3	NM_022555.3	1.65	0.0693863	IL17B	NM_014443.2	-2.69	0.0829644	JAK3	NM_000215.2	1.3	0.0199568
ITGAX	NM_000887.3	1.91	0.0702714	FOXP3	NM_014009.3	-1.45	0.083924	ZNF143	NM_003442.5	1.28	0.0202585
IL13RA1	NM_001560.2	-1.23	0.0742646	CFB	NM_001710.5	2.84	0.0842615	SAP130	NM_024545.3	1.25	0.020272
MX1	NM_002462.2	-1.45	0.0744422	PSMB10	NM_002801.2	1.29	0.0856073	ARG2	NM_001172.3	11.42	0.020466
HDAC3	NM_003883.2	-1.09	0.0748269	CD81	NM_004356.3	1.15	0.0860617	SPANXB1	NM_032461.2	4.89	0.0205966
TLR7	NM_016562.3	1.5	0.0756183	CCL2	NM_002982.3	2.2	0.0865332	CD3D	NM_000732.4	2.51	0.0205997
ITK	NM_005546.3	2.72	0.0766431	BCL2L1	NM_001191.2	1.09	0.0887769	CEACAM1	NM_001712.3	4.2	0.020636
XCR1	NM_005283.2	1.58	0.0774327	UBC	NM_021009.3	-1.23	0.0897457	ITGAL	NM_002209.2	1.92	0.0209367
PRPF38A	NM_032864.3	1.13	0.0780395	TNFSF4	NM_003326.2	1.15	0.0899263	IFNG	NM_000619.2	1.98	0.0211037
RUNX1	NM_001754.4	-2	0.0788474	LTA	NM_000595.2	-1.68	0.0908502	IL22RA1	NM_021258.2	2.33	0.0214157
THY1	NM_006288.2	-2.26	0.0791854	CD4	NM_000616.4	-1.6	0.0910219	BID	NM_001196.2	2.41	0.0215533
PIK3CG	NM_002649.2	1.71	0.0792382	C7	NM_000587.2	1.31	0.091221	ETS1	NM_005238.3	1.23	0.0215829
CD160	NM_007053.2	2.55	0.0795418	PIK3CD	NM_005026.3	1.14	0.091527	LILRA1	NM_006863.1	2.06	0.0219024
MAGEC1	NM_005462.4	2.81	0.0800868	HAVCR2	NM_032782.3	-1.28	0.0916702	NRP1	NM_003873.5	-1.68	0.0219187
NEFL	NM_006158.3	2.02	0.0818909	CD79A	NM_001783.3	2.69	0.0924488	CCL26	NM_006072.4	2.14	0.0220226
CKLF	NM_181640.2	-1.08	0.0831243	PRAME	NM_006115.3	-1.38	0.0946206	IL4	NM_000589.2	3.43	0.0221371
TICAM2	NM_021649.4	1.33	0.0837452	MIF	NM_002415.1	1.48	0.0951648	IFIH1	NM_022168.2	-1.33	0.0224511
PSEN2	NM_000447.2	1.12	0.0838915	IRF5	NM_002200.3	-1.73	0.0981614	CAMP	NM_004345.3	3.55	0.022508
FN1	NM_212482.1	-1.58	0.0843446	AIRE	NM_000383.2	-1.72	0.0984906	MCAM	NM_006500.2	-2.53	0.0225313
IL27	NM_145659.3	2.42	0.0864711	A2M	NM_000014.4	1.23	0.100183	TGFB2	NM_003238.2	-1.6	0.0231515
DHX16	NM_001164239.1	-1.12	0.0867371	CD180	NM_005582.2	-1.7	0.10102	ABL1	NM_005157.3	-1.27	0.0235806
CTSW	NM_001335.3	2.38	0.0877026	TTK	NM_003318.3	-1.91	0.102833	CD164	NM_006016.4	1.18	0.0238263
GPI	NM_000175.2	1.1	0.0877731	ENG	NM_001114753.1	1.26	0.103167	C8B	NM_000066.2	3.1	0.0240542
IL11RA	NM_147162.1	-1.19	0.0878463	ITGA6	NM_000210.1	1.36	0.104844	BTK	NM_000061.1	2.16	0.0240827
ARG1	NM_000045.2	2.53	0.0881812	CYFIP2	NM_001037332.2	1.37	0.105045	CLU	NM_001831.2	2.44	0.0241186
CXCL11	NM_005409.4	2.14	0.0898731	IL10	NM_000572.2	-2.01	0.105662	HDAC3	NM_003883.2	-1.19	0.0243615
IRF3	NM_001571.5	1.16	0.0903125	CD276	NM_001024736.1	1.16	0.10674	PRAME	NM_006115.3	2.04	0.0244451
IL17F	NM_052872.3	2.81	0.0905689	NFATC1	NM_172389.1	1.33	0.106784	IGLL1	NM_020070.2	2.17	0.0245187
YTHDF2	NM_001172828.1	1.18	0.0906709	C2	NM_000063.3	1.51	0.107874	MAP2K1	NM_002755.2	1.33	0.0245935
IFI35	NM_005533.3	-1.48	0.0907579	ULBP2	NM_025217.2	-1.73	0.108257	IL19	NM_013371.3	-1.83	0.0248093
CCL21	NM_002989.2	3.28	0.0909089	KLRC2	NM_002260.3	-1.94	0.108304	SYT17	NM_016524.2	2.81	0.0248465
FUT5	NM_002034.2	2.21	0.0919798	KLRB1	NM_002258.2	4.33	0.108611	ENG	NM_001114753.1	-1.38	0.0248855
HMGB1	NM_002128.4	1.09	0.0924362	CLEC6A	NM_001007033.1	-2.07	0.108865	TNFSF8	NM_001244.3	2.09	0.025013
TNFRSF13C	NM_052945.3	2.35	0.0925615	HAMP	NM_021175.2	-2.24	0.109724	IFNL1	NM_172140.1	-2.13	0.0251525
IFIH1	NM_022168.2	-1.26	0.0926417	CLEC5A	NM_013252.2	-3.1	0.110676	IL17RB	NM_018725.3	3.71	0.0252544
NLRC5	NM_032206.4	1.37	0.0949074	SH2D1A	NM_001114937.2	2.53	0.11091	TBP	NM_001172085.1	-1.13	0.0256503
CTSG	NM_001911.2	2.2	0.095718	ILF3	NM_001137673.1	1.13	0.11122	IL12RB2	NM_001559.2	4.12	0.0258043
IL34	NM_152456.1	-2.04	0.096695	TNFRSF11B	NM_002546.2	-3.27	0.111631	PSMB8	NM_004159.4	-1.32	0.026075
MAF	NM_005360.4	1.25	0.0970492	PNMA1	NM_006029.4	-1.22	0.112393	CD200	NM_005944.5	-1.67	0.0261206
CD3EAP	NM_012099.1	1.19	0.0972731	ROPN1	NM_017578.2	-1.46	0.114204	EWSR1	NM_013986.3	-1.24	0.026438
CCL3	NM_002983.2	2.2	0.0974031	MARCO	NM_006770.3	-1.6	0.114497	CTAG1B	NM_001327.2	2.67	0.0268958
MEFV	NM_000243.2	2.43	0.0977566	TLR8	NM_016610.2	-2.04	0.117451	IKBKG	NM_003639.2	-1.38	0.0271857
ADORA2A	NM_000675.3	-1.4	0.0978952	AGK	NM_018238.3	1.16	0.117941	CD27	NM_001242.4	3.13	0.0282403
SLAMF1	NM_003037.2	2.07	0.0979947	SPP1	NM_000582.2	-1.91	0.118144	HLA-DOB	NM_002120.3	4.92	0.0283543
IL21	NM_021803.2	2.6	0.0989117	SSX4	NM_005636.3	-2.86	0.118945	FOXJ1	NM_001454.3	-2.83	0.0291977
IFNL1	NM_172140.1	-2.26	0.0989124	MX1	NM_002462.2	-1.24	0.120059	TMUB2	NM_024107.2	-1.22	0.0293733
CD96	NM_005816.4	2.86	0.0990572	CSF2	NM_000758.2	-3.18	0.120098	IL12RB1	NM_005535.1	1.84	0.0301554
CRP	NM_000567.2	2.61	0.0994151	IRF1	NM_002198.1	1.65	0.12174	LAMP3	NM_014398.3	5.54	0.0305407
SH2D1A	NM_001114937.2	2.58	0.0994422	IL2	NM_000586.2	-2.22	0.122175	ICAM3	NM_002162.3	-1.37	0.0308655
A2M	NM_000014.4	1.33	0.099553	HCK	NM_002110.2	-1.33	0.123206	IL17A	NM_002190.2	-1.53	0.0315395
CEACAM8	NM_001816.3	2.24	0.101781	KIR2DS1	NM_014512.1	-1.71	0.124878	CD79B	NM_021602.2	2.1	0.0317085
IRF2	NM_002199.3	-1.13	0.103421	RELA	NM_021975.2	1.11	0.1257	TNFSF11	NM_003701.2	-2.02	0.0317403
ATG12	NM_004707.2	1.33	0.103708	ITGAL	NM_002209.2	1.31	0.128041	ELK1	NM_005229.3	-1.88	0.0323706
CD244	NM_016382.2	-2.32	0.104056	IKBKB	NM_001556.1	-1.44	0.130059	ZAP70	NM_001079.3	1.77	0.0334839
ELK1	NM_005229.3	-1.52	0.104357	HLA-A	NM_002116.5	1.59	0.130515	MEF2C	NM_002397.3	1.36	0.0339772
CDKN1A	NM_000389.2	1.86	0.105599	ITK	NM_005546.3	-2.03	0.131919	IFNAR2	NM_000874.3	-1.28	0.0339917
TNFSF12	NM_003809.2	-1.12	0.108448	PRKCD	NM_006254.3	-1.28	0.133125	MPPED1	NM_001044370.1	1.69	0.0342797
MAP3K5	NM_005923.3	1.2	0.110672	LY86	NM_004271.3	-1.29	0.133131	TNFAIP3	NM_006290.2	2.35	0.034421
TPSAB1	NM_003294.3	3.03	0.111306	ITGAE	NM_002208.4	1.13	0.134933	CCR1	NM_001295.2	2.19	0.0352781
TNFSF4	NM_003326.2	-1.22	0.111365	MS4A1	NM_152866.2	-2.27	0.135029	IFNA2	NM_000605.3	3.47	0.0355268
IFIT2	NM_001547.4	-1.45	0.113129	PIN1	NM_006221.2	-1.13	0.137224	BLK	NM_001715.2	-2.12	0.0355361
IL1A	NM_000575.3	2.71	0.113926	SYCP1	NM_003176.2	-1.63	0.139321	IL1RAPL2	NM_017416.1	2.17	0.0360602
FYN	NM_002037.3	1.18	0.114145	GUSB	NM_000181.1	1.22	0.140477	TLR7	NM_016562.3	1.85	0.0363249
CXCL5	NM_002994.3	1.94	0.114565	BID	NM_001196.2	-1.65	0.140819	SPP1	NM_000582.2	2.88	0.0363826
HRAS	NM_005343.2	-1.2	0.115762	CD22	NM_001771.2	1.12	0.142929	GZMK	NM_002104.2	3.58	0.0366742
CASP10	NM_032977.3	1.3	0.116549	CSF3	NM_000759.3	-2	0.144211	ITGA2B	NM_000419.3	1.46	0.0373764
CD1C	NM_001765.2	1.89	0.119347	LBP	NM_004139.2	-2.49	0.144315	IL27	NM_145659.3	3.16	0.0380188
HLA-DOB	NM_002120.3	2.04	0.121261	REL	NM_002908.2	-1.71	0.144922	SPO11	NM_198265.1	4.34	0.0383293
IL8	NM_000584.2	3.03	0.12334	CD37	NM_001774.2	-1.56	0.145932	S100A7	NM_002963.2	2.56	0.0385809
HLA-E	NM_005516.4	-1.25	0.124446	NUP107	NM_020401.2	-1.07	0.146223	ALCAM	NM_001627.3	1.17	0.0396982
LAG3	NM_002286.5	1.3	0.124931	CCR7	NM_001838.2	-2.21	0.147579	FYN	NM_002037.3	-1.36	0.0397285
HPRT1	NM_000194.1	1.21	0.125195	S100A7	NM_002963.2	-1.96	0.148049	SIGIRR	NM_021805.2	1.52	0.0397909
KIR3DL1	NM_013289.2	2	0.125219	PRPF38A	NM_032864.3	1.11	0.149418	CMA1	NM_001836.2	-1.53	0.040239
MERTK	NM_006343.2	-1.16	0.125821	SELL	NR_029467.1	-1.77	0.150759	FLT3	NM_004119.1	3.96	0.0403309
IL18	NM_001562.2	1.29	0.126093	CSF2RB	NM_000395.2	-1.38	0.151992	DHX16	NM_001164239.1	-1.19	0.0405722
TNFSF14	NM_003807.3	2.98	0.126877	MST1R	NM_002447.1	1.36	0.153189	TIRAP	NM_148910.2	-1.12	0.0418346
LTK	NM_001135685.1	2.08	0.127214	THBS1	NM_003246.2	1.59	0.153691	CXCL13	NM_006419.2	-1.84	0.0424834
PBK	NM_018492.2	2.11	0.127663	TARP	NM_001003799.1	-1.84	0.154073	ISG15	NM_005101.3	-2.64	0.0430347
IL1RN	NM_000577.3	2.42	0.128849	HLA-C	NM_002117.4	-1.29	0.154364	CLEC4C	NM_203503.1	-3.28	0.0431399
C3	NM_000064.2	2.57	0.129182	NEFL	NM_006158.3	-1.6	0.154422	COLEC12	NM_130386.2	-1.94	0.0437833
THBD	NM_000361.2	1.57	0.129514	CCR2	NM_001123041.2	-1.7	0.154824	MAPK3	NM_001040056.1	-1.14	0.0441324
CCL5	NM_002985.2	2.04	0.130298	KIR3DL2	NM_006737.2	-1.67	0.156315	CD81	NM_004356.3	-1.19	0.0446322
BST2	NM_004335.2	1.19	0.131177	TNFAIP3	NM_006290.2	-1.7	0.158609	CD47	NM_001777.3	-1.18	0.045852
CDK1	NM_001786.4	-1.84	0.132166	VEGFC	NM_005429.2	1.26	0.158899	CD37	NM_001774.2	1.81	0.0466692
TLR2	NM_003264.3	1.34	0.133373	IL18	NM_001562.2	1.26	0.158928	IL18R1	NM_003855.2	1.73	0.0470012
SBNO2	NM_014963.2	1.15	0.133421	RELB	NM_006509.2	1.44	0.159056	CD8A	NM_001768.5	2.79	0.0470763
CD27	NM_001242.4	2.24	0.133876	IL1RN	NM_000577.3	-1.7	0.160518	RELA	NM_021975.2	-1.16	0.0472511
CD97	NM_078481.2	1.18	0.13407	CAMP	NM_004345.3	-1.75	0.160566	CLEC6A	NM_001007033.1	2.81	0.0481173
KLRC1	NM_002259.3	1.8	0.13691	GTF3C1	NM_001520.3	-1.05	0.162439	GNLY	NM_006433.2	10.05	0.0481403
CD276	NM_001024736.1	-1.21	0.137057	TNFRSF12A	NM_016639.1	-1.5	0.162781	EDC3	NM_001142443.1	-1.32	0.0482947
MS4A2	NM_000139.3	2.03	0.137855	TMUB2	NM_024107.2	-1.08	0.163909	TREM2	NM_018965.3	1.51	0.0483191
IFNG	NM_000619.2	1.53	0.140178	ITGA5	NM_002205.2	1.32	0.164169	CHIT1	NM_003465.2	2.5	0.0489561
NFKBIA	NM_020529.1	1.48	0.143815	IRAK1	NM_001569.3	1.18	0.164742	MME	NM_000902.2	1.78	0.050533
IL7R	NM_002185.2	1.8	0.144632	YTHDF2	NM_001172828.1	1.2	0.165601	LAMP1	NM_005561.3	-1.27	0.0506526
FUT7	NM_004479.3	1.93	0.145384	TANK	NM_004180.2	1.1	0.165652	NOD2	NM_022162.1	2.45	0.0506827
ITGA4	NM_000885.4	-1.62	0.147866	MAGEB2	NM_002364.4	-1.68	0.165789	PPIA	NM_021130.2	1.13	0.0516764
TARP	NM_001003799.1	2.15	0.149457	HLA-DOB	NM_002120.3	-2.41	0.166272	TFE3	NM_006521.3	1.16	0.0518435
CD5	NM_014207.2	-2.08	0.149851	IL11	NM_000641.2	-1.8	0.167091	CD46	NM_172350.1	-1.15	0.0522447
CCR9	NM_031200.1	2.26	0.151569	IL13RA2	NM_000640.2	-2.74	0.169708	MS4A2	NM_000139.3	2.3	0.0529847
CD59	NM_000611.4	1.13	0.152851	SF3A3	NM_006802.2	1.13	0.171425	IL15RA	NM_002189.2	1.65	0.0530055
IGF1R	NM_000875.2	1.2	0.153836	IFNA17	NM_021268.2	-1.63	0.173147	AXL	NM_021913.2	-1.29	0.0531033
NCAM1	NM_000615.5	-1.14	0.155342	ETS1	NM_005238.3	-1.12	0.174013	CD244	NM_016382.2	3.46	0.0534629
BLK	NM_001715.2	-1.76	0.156036	BTLA	NM_181780.2	-1.54	0.174551	CTLA4	NM_005214.3	2.69	0.0540876
CEBPB	NM_005194.2	1.64	0.156937	CXCL3	NM_002090.2	-2.35	0.175858	ITGAX	NM_000887.3	1.9	0.0543144
C6	NM_000065.2	-1.53	0.157209	CD8B	NM_004931.3	-1.28	0.176063	ENTPD1	NM_001098175.1	1.48	0.0553328
MFGE8	NM_001114614.1	1.19	0.157812	MAGEA1	NM_004988.4	-3.34	0.176205	CXCL14	NM_004887.4	9.74	0.0560016
ICAM3	NM_002162.3	-1.25	0.161088	TNFSF13	NM_003808.3	1.23	0.177152	ITGA1	NM_181501.1	-1.47	0.0572544
EOMES	NM_005442.2	2.19	0.16249	MICB	NM_005931.3	-1.78	0.177227	IL11	NM_000641.2	2.58	0.0574025
SYCP1	NM_003176.2	1.73	0.164446	CD1A	NM_001763.2	-1.46	0.177283	TNF	NM_000594.2	3.2	0.0586354
CHIT1	NM_003465.2	1.92	0.165168	MAPK8	NM_002750.2	1.18	0.177557	IL32	NM_004221.4	-2	0.0588208
HLA-DMA	NM_006120.3	1.36	0.168291	LRP1	NM_002332.2	1.31	0.17866	ANP32B	NM_006401.2	1.12	0.0588781
MAP3K7	NM_145333.1	-1.04	0.169786	IL15	NM_172174.1	-1.25	0.179742	KIR2DL3	NM_014511.3	-1.42	0.0604344
CD19	NM_001770.4	1.31	0.173016	IL5RA	NM_000564.3	-1.48	0.179996	SERPINB2	NM_002575.1	-1.42	0.0604344
CAMP	NM_004345.3	2.03	0.174709	CD19	NM_001770.4	1.26	0.180195	ANXA1	NM_000700.1	-1.5	0.0604686
OAS3	NM_006187.2	-1.56	0.17494	IFNA8	NM_002170.3	-2.41	0.182553	IL1RL2	NM_003854.2	1.82	0.0609497
MASP1	NM_139125.3	2.18	0.177221	LIF	NM_002309.3	1.82	0.182555	CXCL3	NM_002090.2	3.06	0.0611327
IL21R	NM_021798.2	1.68	0.178383	TAP2	NM_000544.3	1.23	0.18262	IFI35	NM_005533.3	-1.56	0.0623569
NUBP1	NM_001278506.1	1.1	0.180506	HDAC3	NM_003883.2	1.09	0.182813	IL2RG	NM_000206.1	2.76	0.0625729
ST6GAL1	NM_003032.2	1.14	0.183527	LY9	NM_001033667.1	-1.67	0.183776	SERPING1	NM_000062.2	-1.23	0.0629267
IL2RG	NM_000206.1	2.18	0.185762	CDKN1A	NM_000389.2	-1.7	0.185586	TBX21	NM_013351.1	1.76	0.063858
TYK2	NM_003331.3	-1.08	0.186763	SMAD2	NM_005901.5	1.11	0.1856	PIK3CD	NM_005026.3	-1.15	0.064497
IL2RA	NM_000417.1	1.92	0.187011	HPRT1	NM_000194.1	-1.17	0.18588	LCK	NM_005356.2	2.03	0.0646007
PDGFC	NM_016205.2	-1.35	0.189185	CD46	NM_172350.1	1.1	0.191467	NFATC3	NM_004555.2	1.12	0.0652003
ZC3H14	NM_001160103.1	1.1	0.189803	HLA-DMB	NM_002118.3	-1.27	0.191688	IL34	NM_152456.1	-2.25	0.0662068
TOLLIP	NM_019009.2	1.07	0.189982	ATG16L1	NM_198890.2	-1.39	0.192373	VCAM1	NM_001078.3	1.64	0.0665949
NOL7	NM_016167.3	-1.04	0.194129	PIK3CG	NM_002649.2	1.26	0.194378	IFIT1	NM_001548.3	-1.5	0.0678846
BLNK	NM_013314.2	-2.19	0.195802	CXCL13	NM_006419.2	1.91	0.197374	CD48	NM_001778.2	2.5	0.0682025
CD3E	NM_000733.2	2.03	0.197753	TIRAP	NM_148910.2	-1.09	0.197565	GTF3C1	NM_001520.3	-1.11	0.0683908
CFB	NM_001710.5	2.09	0.199533	C3AR1	NM_004054.2	-1.21	0.197691	STAT1	NM_007315.2	-1.51	0.069067
BTLA	NM_181780.2	1.71	0.199744	IL9	NM_000590.1	-1.77	0.202223	IL13RA2	NM_000640.2	3.96	0.0690804
JAM3	NM_032801.3	1.09	0.201365	CD48	NM_001778.2	1.32	0.202389	MASP1	NM_139125.3	3.08	0.0694417
FPR2	NM_001462.3	1.61	0.201468	HLA-DRB3	NM_022555.3	1.46	0.203226	TPSAB1	NM_003294.3	3.37	0.0696231
IL1R1	NM_000877.2	-1.52	0.203941	TIGIT	NM_173799.2	-1.18	0.203859	ICAM2	NM_000873.3	-1.4	0.0700438
TNFRSF10C	NM_003841.3	1.78	0.205053	TNF	NM_000594.2	-1.87	0.204543	CCL2	NM_002982.3	-1.84	0.0703204
CSF3R	NM_156038.2	-2.01	0.205568	LILRA1	NM_006863.1	-1.4	0.207151	LIF	NM_002309.3	2.91	0.0715246
CCL3L1	NM_021006.4	2.07	0.208203	MSR1	NM_002445.3	-1.2	0.209148	DDX43	NM_018665.2	1.97	0.071594
CXCR4	NM_003467.2	1.67	0.208745	LTB	NM_002341.1	-1.61	0.209579	ATG12	NM_004707.2	1.38	0.0722218
CCL25	NM_005624.2	1.8	0.20974	NUBP1	NM_001278506.1	-1.1	0.209801	PIN1	NM_006221.2	-1.21	0.0728514
JAK1	NM_002227.1	-1.04	0.210334	EDC3	NM_001142443.1	-1.16	0.209943	MAPK11	NM_002751.5	-1.3	0.0733
CD180	NM_005582.2	1.61	0.211396	CXCL16	NM_001100812.1	-1.22	0.211413	CXCL6	NM_002993.3	2.79	0.0739625
IL15RA	NM_002189.2	1.43	0.214078	JAM3	NM_032801.3	1.13	0.213489	CEBPB	NM_005194.2	2.32	0.0748083
ETS1	NM_005238.3	1.1	0.214316	CCL7	NM_006273.2	1.62	0.216165	ATG16L1	NM_198890.2	1.68	0.0761113
IL19	NM_013371.3	-1.52	0.214349	SBNO2	NM_014963.2	1.18	0.216265	CD3E	NM_000733.2	2.37	0.0781452
RAG1	NM_000448.2	-1.3	0.214368	MPPED1	NM_001044370.1	-1.77	0.217605	MAP2K2	NM_030662.2	-1.16	0.0783006
PRAME	NM_006115.3	1.47	0.214666	ICAM4	NM_001039132.1	-1.5	0.220633	NFATC4	NM_001136022.2	-1.17	0.0786265
CD3G	NM_000073.2	1.87	0.214922	TNFSF18	NM_005092.2	1.86	0.223658	PSEN1	NM_000021.2	-1.11	0.0789481
PRKCE	NM_005400.2	1.12	0.214928	CD2	NM_001767.3	1.47	0.224129	IL10	NM_000572.2	2.18	0.079179
IGLL1	NM_020070.2	1.57	0.218021	AMMECR1L	NM_001199140.1	1.13	0.22553	REL	NM_002908.2	1.91	0.0795833
BTK	NM_000061.1	1.48	0.21827	CREBBP	NM_004380.2	1.17	0.225715	FLT3LG	NM_001459.3	-1.11	0.0799505
LILRA1	NM_006863.1	1.47	0.218718	CX3CR1	NM_001337.3	-1.13	0.22575	CARD11	NM_032415.2	2.25	0.0810185
CXCL1	NM_001511.1	1.64	0.218977	HLA-E	NM_005516.4	-1.16	0.225928	IL8	NM_000584.2	3.39	0.0818296
CLEC4A	NM_194448.2	-1.11	0.222172	CCL15	NM_032965.3	-2.5	0.226118	IRF7	NM_001572.3	-1.37	0.0834217
POU2AF1	NM_006235.2	1.88	0.22219	SERPINB2	NM_002575.1	1.49	0.227051	CXCR6	NM_006564.1	1.86	0.0836093
MS4A1	NM_152866.2	1.81	0.223145	KLRG1	NM_005810.3	2.35	0.227613	MARCO	NM_006770.3	1.66	0.0837109
TNFAIP3	NM_006290.2	1.39	0.229529	CD3G	NM_000073.2	-1.84	0.23602	TNFRSF4	NM_003327.2	2.11	0.084159
CARD11	NM_032415.2	1.72	0.231933	KIR2DL3	NM_014511.3	1.45	0.236272	CXCL2	NM_002089.3	5.97	0.0842033
EIF2B4	NM_172195.3	-1.04	0.235046	TMEFF2	NM_016192.2	-1.92	0.240007	TRAF6	NM_145803.1	1.13	0.0850736
TNFRSF4	NM_003327.2	1.7	0.239253	HLA-DPA1	NM_033554.2	-1.32	0.240196	COG7	NM_153603.3	-1.1	0.0868446
HLA-C	NM_002117.4	-1.43	0.241899	CTLA4	NM_005214.3	-1.56	0.240316	CFP	NM_002621.2	2.05	0.0892131
TANK	NM_004180.2	1.08	0.243043	ERCC3	NM_000122.1	-1.14	0.246971	CCL3	NM_002983.2	1.99	0.0896903
CFP	NM_002621.2	1.46	0.24346	MAPK11	NM_002751.5	-1.11	0.250065	IL6R	NM_000565.2	-1.23	0.0913477
HAMP	NM_021175.2	-1.78	0.246986	MME	NM_000902.2	-1.73	0.251054	ITGAM	NM_000632.3	1.32	0.0922338
ITGB3	NM_000212.2	-1.52	0.248213	ELK1	NM_005229.3	1.24	0.251804	CD5	NM_014207.2	-4.05	0.093219
CD40LG	NM_000074.2	1.34	0.250971	CD1C	NM_001765.2	-1.44	0.251902	CXCL1	NM_001511.1	1.85	0.0936676
CD99	NM_002414.3	1.1	0.254248	JAK2	NM_004972.2	1.07	0.254201	IRAK2	NM_001570.3	-1.37	0.0939268
CMKLR1	NM_004072.1	1.33	0.254523	ITGAM	NM_000632.3	-1.16	0.258619	MERTK	NM_006343.2	-1.17	0.0940705
ELANE	NM_001972.2	1.51	0.258336	ITGB2	NM_000211.2	1.33	0.259051	LBP	NM_004139.2	2.78	0.0941248
TNFRSF1A	NM_001065.2	-1.13	0.259282	CEACAM8	NM_001816.3	-1.48	0.260792	CCL3L1	NM_021006.4	2.14	0.0941924
MAPK14	NM_001315.1	-1.07	0.264173	SPN	NM_003123.3	-2.19	0.262181	LAG3	NM_002286.5	1.31	0.0944484
HAVCR2	NM_032782.3	1.24	0.264662	ITGA2	NM_002203.2	1.19	0.264293	CSF1	NM_000757.4	1.33	0.0946175
TRAF6	NM_145803.1	1.06	0.264984	SIGIRR	NM_021805.2	-1.23	0.265484	GZMA	NM_006144.2	2.27	0.0946918
LILRB1	NM_001081637.1	-1.78	0.26633	NFATC2	NM_012340.3	1.32	0.266241	CCL24	NM_002991.2	-1.38	0.0948399
FCGR1A	NM_000566.3	1.52	0.266726	AMBP	NM_001633.3	-1.35	0.266306	CCL28	NM_148672.2	-1.38	0.0948399
CCL4	NM_002984.2	1.62	0.267325	CD74	NM_001025159.1	1.3	0.268213	CD1B	NM_001764.2	-1.38	0.0948399
TNFRSF11A	NM_003839.2	-1.98	0.26782	CD47	NM_001777.3	1.09	0.268292	TNFRSF13B	NM_012452.2	-1.38	0.0948399
CD55	NM_000574.3	-1.11	0.269355	KLRC1	NM_002259.3	-1.5	0.268792	TNFSF18	NM_005092.2	-1.38	0.0948399
ITGA2B	NM_000419.3	-1.13	0.270157	AMICA1	NM_153206.2	-1.21	0.269816	USP9Y	NM_004654.3	-1.38	0.0948399
ISG20	NM_002201.4	1.31	0.270574	CXCL12	NM_000609.5	1.53	0.270273	TGFB1	NM_000660.3	1.35	0.0959259
NFKB1	NM_003998.2	-1.1	0.274551	BCL10	NM_003921.2	1.16	0.271548	TNFSF14	NM_003807.3	-2.05	0.0975271
SDHA	NM_004168.1	1.08	0.275304	PASD1	NM_173493.2	-1.71	0.271565	CCR4	NM_005508.4	2.93	0.0978559
IRAK4	NM_016123.1	1.08	0.275408	TFRC	NM_003234.1	-1.83	0.2717	LAMP2	NM_001122606.1	-1.2	0.0992147
DPP4	NM_001935.3	-1.58	0.275676	CNOT10	NM_001256741.1	1.08	0.27279	PTGS2	NM_000963.1	2.33	0.0992483
IRAK2	NM_001570.3	-1.5	0.278336	BIRC5	NM_001168.2	-1.62	0.273648	ITGA6	NM_000210.1	-1.46	0.0995056
IL1B	NM_000576.2	1.92	0.278832	CD209	NM_021155.2	-1.47	0.276102	CD2	NM_001767.3	-1.55	0.0996
RIPK2	NM_003821.5	1.17	0.279765	IL4	NM_000589.2	-1.35	0.278727	TRAF2	NM_021138.3	-1.14	0.0997853
CCR2	NM_001123041.2	1.51	0.28053	CTSL	NM_001912.4	-1.07	0.279603	OAS3	NM_006187.2	-1.72	0.100051
ITGB1	NM_033666.2	-1.15	0.280587	CCRL2	NM_003965.4	-1.63	0.280823	LY96	NM_015364.2	-1.18	0.100325
IL16	NM_004513.4	1.3	0.286042	DMBT1	NM_007329.2	2.52	0.282224	PRKCE	NM_005400.2	-1.18	0.100381
HCK	NM_002110.2	-1.3	0.287854	CNOT4	NM_001190848.1	-1.06	0.285346	CD22	NM_001771.2	-1.21	0.100616
LCK	NM_005356.2	1.54	0.291674	IGLL1	NM_020070.2	-1.38	0.286409	SLAMF7	NM_021181.3	3.25	0.101009
G6PD	NM_000402.2	-1.11	0.291687	TLR6	NM_006068.2	-1.23	0.291002	ZNF205	NM_001031686.1	-1.36	0.101365
TXK	NM_003328.1	1.57	0.296873	MAGEC2	NM_016249.3	-1.51	0.292303	NFATC1	NM_172389.1	-1.25	0.102207
NFKB2	NM_002502.2	-1.15	0.297424	PDGFRB	NM_002609.3	-1.09	0.29266	CCL8	NM_005623.2	2.22	0.10291
CTSS	NM_004079.3	1.31	0.297749	MAP2K2	NM_030662.2	1.08	0.292939	RPS6	NM_001010.2	1.28	0.104311
TRAF2	NM_021138.3	1.07	0.299408	NOS2A	NM_153292.1	2.8	0.293008	POLR2A	NM_000937.2	-1.18	0.104822
C5	NM_001735.2	1.1	0.300476	PRM1	NM_002761.2	-2.52	0.293749	KLRD1	NM_002262.3	-2.33	0.106534
NCF4	NM_000631.4	1.34	0.300603	CX3CL1	NM_002996.3	1.24	0.294525	CXCR4	NM_003467.2	1.89	0.106851
PAX5	NM_016734.1	1.66	0.301495	MBL2	NM_000242.2	-1.76	0.299532	MSR1	NM_002445.3	1.4	0.108412
C1S	NM_001734.2	-1.13	0.304716	RUNX3	NM_004350.1	-1.7	0.30019	TRIM39	NM_021253.3	1.35	0.108637
IL1RAPL2	NM_017416.1	1.5	0.305861	IL12B	NM_002187.2	-1.59	0.304418	ITGA2	NM_002203.2	-1.57	0.108915
C4B	NM_001002029.3	-1.36	0.308599	CFP	NM_002621.2	-1.41	0.305546	GUSB	NM_000181.1	-1.25	0.113418
COG7	NM_153603.3	-1.04	0.311886	IRAK4	NM_016123.1	1.07	0.308926	SELPLG	NM_001206609.1	1.54	0.113534
TLR9	NM_017442.2	1.15	0.312944	SLAMF7	NM_021181.3	-2.07	0.308945	IFITM1	NM_003641.3	1.28	0.114163
ITGA2	NM_002203.2	-1.31	0.313515	TRIM39	NM_021253.3	1.18	0.310663	CLEC7A	NM_197954.2	2.27	0.115429
CD47	NM_001777.3	-1.09	0.314451	F13A1	NM_000129.3	-1.47	0.310865	IL17B	NM_014443.2	2.22	0.116513
CD53	NM_001040033.1	1.28	0.315024	STAT4	NM_003151.2	-1.23	0.310954	MFGE8	NM_001114614.1	1.25	0.117573
TMEFF2	NM_016192.2	-1.52	0.319005	MAPK1	NM_138957.2	-1.18	0.311404	LY86	NM_004271.3	1.63	0.117659
MUC1	NM_001018017.1	-1.41	0.319326	ICOSLG	NM_015259.4	-1.33	0.314089	TNFRSF8	NM_152942.2	1.51	0.118508
CTSH	NM_004390.3	1.16	0.319645	CD207	NM_015717.2	-1.45	0.31621	CD44	NM_001001392.1	1.32	0.118795
IL3RA	NM_002183.2	-1.81	0.320614	POU2F2	NM_002698.2	1.28	0.316482	CCL15	NM_032965.3	3.4	0.11894
BID	NM_001196.2	1.46	0.322098	SELPLG	NM_001206609.1	-1.28	0.318067	HRAS	NM_005343.2	-1.22	0.119307
KLRD1	NM_002262.3	1.65	0.32321	ZKSCAN5	NM_014569.3	-1.14	0.318772	SELE	NM_000450.2	2.7	0.12002
CCL23	NM_145898.1	1.49	0.332715	RIPK2	NM_003821.5	-1.14	0.319342	CSF2	NM_000758.2	3.08	0.120315
ATF1	NM_005171.2	1.04	0.333205	ADA	NM_000022.2	-1.26	0.319469	DMBT1	NM_007329.2	-3.7	0.123949
IFITM2	NM_006435.2	1.15	0.33376	IL12RB1	NM_005535.1	-1.45	0.320956	CR2	NM_001006658.1	-2.2	0.125737
CTLA4	NM_005214.3	1.72	0.333827	ALCAM	NM_001627.3	-1.1	0.322309	RAG1	NM_000448.2	1.29	0.127431
IFI16	NM_005531.1	1.11	0.334617	C1S	NM_001734.2	-1.08	0.325922	RUNX3	NM_004350.1	2.17	0.127687
SELL	NR_029467.1	1.56	0.336231	CXCL14	NM_004887.4	-2.61	0.326525	NFKBIA	NM_020529.1	2.06	0.127819
MAP2K2	NM_030662.2	-1.07	0.337877	C1R	NM_001733.4	1.11	0.326633	RORC	NM_001001523.1	2.81	0.128536
PSMD7	NM_002811.3	1.07	0.341375	CD247	NM_198053.1	-1.33	0.327472	TLR6	NM_006068.2	1.24	0.129103
CD36	NM_001001548.2	1.32	0.343295	CCL17	NM_002987.2	-1.43	0.328055	C4B	NM_001002029.3	-1.64	0.129304
FCER1G	NM_004106.1	-1.31	0.343597	LAMP3	NM_014398.3	-1.98	0.328497	SEMG1	NM_003007.2	2.33	0.130741
CD44	NM_001001392.1	1.18	0.343688	DDX43	NM_018665.2	1.25	0.331052	TNFRSF10B	NM_003842.3	2.56	0.130882
CD28	NM_001243078.1	1.54	0.344187	DUSP4	NM_057158.2	-1.31	0.33364	JAK1	NM_002227.1	-1.07	0.13293
C8B	NM_000066.2	1.42	0.347629	CEACAM1	NM_001712.3	-1.6	0.335394	UBC	NM_021009.3	-1.3	0.134062
CR2	NM_001006658.1	-1.51	0.347896	CD58	NM_001779.2	-1.17	0.33591	MAPK8	NM_002750.2	-1.2	0.135374
FCER1A	NM_002001.2	-1.87	0.349446	COG7	NM_153603.3	1.06	0.337909	NOD1	NM_006092.1	1.13	0.135522
C2	NM_000063.3	1.4	0.350473	IRF3	NM_001571.5	1.11	0.339082	MUC1	NM_001018017.1	-2.01	0.139556
TNFRSF8	NM_152942.2	1.34	0.350891	TNFSF11	NM_003701.2	1.64	0.348413	S100A8	NM_002964.3	2.34	0.139651
ZNF143	NM_003442.5	1.07	0.355302	LTF	NM_002343.2	-1.52	0.349036	MICB	NM_005931.3	1.66	0.141208
SIGIRR	NM_021805.2	1.24	0.35621	MAPKAPK2	NM_004759.3	1.29	0.349855	IRF5	NM_002200.3	1.94	0.142315
FCGR3A	NM_000569.6	1.22	0.356425	C1QB	NM_000491.3	1.21	0.350653	CX3CL1	NM_002996.3	-1.46	0.142733
EWSR1	NM_013986.3	-1.06	0.358434	CTSS	NM_004079.3	1.23	0.35089	CMKLR1	NM_004072.1	1.38	0.1444
HLA-DRB4	NM_021983.4	-3.37	0.360374	XCR1	NM_005283.2	-1.26	0.354068	IL7R	NM_002185.2	1.65	0.144668
RELA	NM_021975.2	-1.05	0.360829	ICOS	NM_012092.2	-1.49	0.35689	MAP4K2	NM_004579.2	-1.17	0.147266
SSX1	NM_005635.2	1.45	0.36091	DUSP6	NM_001946.2	1.51	0.357337	IRF1	NM_002198.1	-1.42	0.148339
IFNGR1	NM_000416.1	1.07	0.361828	CREB1	NM_004379.3	1.06	0.358322	SLAMF6	NM_001184714.1	3.84	0.149549
TICAM1	NM_014261.1	1.09	0.363231	NOL7	NM_016167.3	-1.03	0.358851	FADD	NM_003824.2	1.23	0.150382
PLA2G6	NM_001004426.1	-1.11	0.364331	FCGR2B	NM_001002273.1	-1.3	0.359275	MAF	NM_005360.4	1.27	0.151185
JAK3	NM_000215.2	-1.08	0.368254	CD24	NM_013230.2	-1.33	0.362034	ZKSCAN5	NM_014569.3	-1.2	0.152029
CASP1	NM_001223.3	-1.09	0.370676	ENTPD1	NM_001098175.1	-1.37	0.363872	NUP107	NM_020401.2	1.05	0.152609
CD46	NM_172350.1	-1.05	0.373396	IFNG	NM_000619.2	-1.29	0.365162	CCL23	NM_145898.1	2.4	0.15264
TUBB	NM_178014.2	1.06	0.375128	CXCL6	NM_002993.3	-1.77	0.365201	PNMA1	NM_006029.4	1.19	0.153472
RRAD	NM_004165.1	-1.57	0.380827	SSX1	NM_005635.2	-2.24	0.366551	APP	NM_000484.3	-1.26	0.153923
CLEC6A	NM_001007033.1	1.36	0.385494	ICAM3	NM_002162.3	1.1	0.36954	ST6GAL1	NM_003032.2	1.21	0.156427
ANP32B	NM_006401.2	-1.04	0.387146	TNFSF8	NM_001244.3	-1.13	0.369611	MBL2	NM_000242.2	2.07	0.157061
LCP1	NM_002298.4	1.26	0.389987	TLK2	NM_006852.2	1.06	0.370586	CD209	NM_021155.2	1.48	0.159373
RORA	NM_134261.2	-1.1	0.390194	TRAF6	NM_145803.1	-1.06	0.370944	CREBBP	NM_004380.2	1.2	0.160506
CYLD	NM_015247.1	1.03	0.391893	IKBKE	NM_014002.2	1.11	0.371345	MAGEA12	NM_001166386.1	3.08	0.162669
IL6ST	NM_002184.2	1.11	0.392181	ITGB1	NM_033666.2	1.04	0.372378	MAGEA1	NM_004988.4	3.34	0.162769
IRF8	NM_002163.2	-1.25	0.393937	CD34	NM_001025109.1	1.22	0.373259	C3AR1	NM_004054.2	1.35	0.167566
SIGLEC1	NM_023068.3	1.41	0.394264	TLR7	NM_016562.3	-1.23	0.37627	MST1R	NM_002447.1	1.31	0.167675
ABCF1	NM_001090.2	-1.05	0.398128	KIR3DL3	NM_153443.3	-1.33	0.377341	CCL11	NM_002986.2	3.47	0.171092
IL7	NM_000880.2	1.37	0.400525	IL1RAPL2	NM_017416.1	-1.45	0.37757	FCGR3A	NM_000569.6	1.51	0.172113
ICAM2	NM_000873.3	-1.16	0.401149	PYCARD	NM_013258.3	1.13	0.378149	ABCB1	NM_000927.3	1.35	0.172744
SPP1	NM_000582.2	1.51	0.40181	KIR3DS1	NM_001083539.1	1.51	0.379317	ITGB1	NM_033666.2	-1.19	0.172953
MCAM	NM_006500.2	-1.29	0.402985	CARD11	NM_032415.2	-1.31	0.380048	MYD88	NM_002468.3	1.16	0.173006
CD7	NM_006137.6	1.54	0.404562	CHIT1	NM_003465.2	-1.3	0.381451	CLEC5A	NM_013252.2	2.65	0.175689
FEZ1	NM_005103.4	-1.11	0.405484	IL2RB	NM_000878.2	-1.3	0.384109	CD97	NM_078481.2	-1.35	0.176038
SLAMF7	NM_021181.3	1.57	0.409972	CD27	NM_001242.4	-1.4	0.38502	IFITM2	NM_006435.2	1.27	0.177926
GZMH	NM_033423.3	1.3	0.414057	IL22RA1	NM_021258.2	1.21	0.385226	CXCL16	NM_001100812.1	-1.3	0.178171
MAP4K2	NM_004579.2	1.08	0.416733	IL3	NM_000588.3	-1.4	0.385799	FCF1	NM_015962.4	-1.05	0.18045
IL17A	NM_002190.2	-1.27	0.4215	CD5	NM_014207.2	1.95	0.391805	PSMB10	NM_002801.2	-1.21	0.183637
NFATC3	NM_004555.2	-1.04	0.424204	MAGEC1	NM_005462.4	-1.56	0.392469	TAP2	NM_000544.3	-1.23	0.189626
CMA1	NM_001836.2	-1.27	0.425495	CDK1	NM_001786.4	-1.35	0.392906	NCF4	NM_000631.4	1.39	0.189756
BCL6	NM_001706.2	1.08	0.425945	CD79B	NM_021602.2	1.28	0.393299	CTSH	NM_004390.3	1.26	0.195595
TNF	NM_000594.2	1.71	0.427735	C4B	NM_001002029.3	1.2	0.394851	HLA-A	NM_002116.5	1.48	0.198016
TNFRSF9	NM_001561.4	1.46	0.428493	DHX16	NM_001164239.1	1.06	0.395377	TNFRSF11B	NM_002546.2	2.48	0.199655
IL1RL2	NM_003854.2	-1.5	0.428661	CD7	NM_006137.6	1.58	0.396081	SSX1	NM_005635.2	3.25	0.200495
LY86	NM_004271.3	1.27	0.430135	TNFRSF17	NM_001192.2	-1.34	0.399853	CD40LG	NM_000074.2	1.47	0.201036
CXCL6	NM_002993.3	1.58	0.433296	IL11RA	NM_147162.1	1.07	0.399957	CSF1R	NM_005211.2	1.51	0.202755
CD63	NM_001780.4	1.08	0.434224	ABCF1	NM_001090.2	-1.05	0.400072	NFATC2	NM_012340.3	-1.36	0.209265
TLR8	NM_016610.2	-1.26	0.434432	CEBPB	NM_005194.2	-1.42	0.400148	AMMECR1L	NM_001199140.1	1.13	0.211241
IL13RA2	NM_000640.2	1.45	0.44297	CD160	NM_007053.2	-1.47	0.401583	INPP5D	NM_005541.3	1.25	0.212263
TAP1	NM_000593.5	-1.17	0.443547	MUC1	NM_001018017.1	1.42	0.409695	STAT4	NM_003151.2	1.61	0.21308
MTMR14	NM_022485.3	1.05	0.443723	CD44	NM_001001392.1	-1.12	0.412424	BST2	NM_004335.2	1.15	0.21488
S100A7	NM_002963.2	1.31	0.44712	XCL2	NM_003175.3	-1.32	0.41384	CCR7	NM_001838.2	1.9	0.219796
FCF1	NM_015962.4	1.03	0.449699	LILRB3	NM_006864.2	-1.47	0.414305	TTK	NM_003318.3	1.93	0.220219
IL11	NM_000641.2	1.44	0.452192	PLA2G1B	NM_000928.2	-1.39	0.421485	IRF2	NM_002199.3	1.13	0.220601
LILRA4	NM_012276.3	1.41	0.453505	MASP1	NM_139125.3	-1.41	0.424767	CD163	NM_004244.4	1.4	0.222396
MSR1	NM_002445.3	1.17	0.454851	C1QBP	NM_001212.3	1.07	0.426935	EOMES	NM_005442.2	2.5	0.223883
TLR3	NM_003265.2	-1.12	0.462894	S100B	NM_006272.1	-1.82	0.42756	IKBKE	NM_014002.2	-1.13	0.231407
IFITM1	NM_003641.3	-1.15	0.46672	LCN2	NM_005564.3	-1.3	0.427845	C3	NM_000064.2	-1.62	0.231825
CCL8	NM_005623.2	1.39	0.4687	SIGLEC1	NM_023068.3	1.14	0.432115	TLR8	NM_016610.2	1.61	0.238936
RUNX3	NM_004350.1	1.27	0.470491	IFNA1	NM_024013.1	-2.15	0.432816	TNFRSF12A	NM_016639.1	1.36	0.239226
LTB	NM_002341.1	1.37	0.471588	TLR2	NM_003264.3	1.15	0.433945	CX3CR1	NM_001337.3	-1.16	0.239234
C4BPA	NM_000715.3	-1.34	0.47202	CXCR5	NM_001716.3	-1.88	0.436379	ERCC3	NM_000122.1	-1.16	0.239356
CCL15	NM_032965.3	1.36	0.475222	CCL23	NM_145898.1	-1.62	0.437989	TAPBP	NM_003190.4	-1.13	0.240287
TLR1	NM_003263.3	1.06	0.486131	SYK	NM_003177.3	-1.19	0.439521	KIR3DS1	NM_001083539.1	-1.23	0.248164
VEGFC	NM_005429.2	1.12	0.488568	IL12A	NM_000882.2	1.64	0.441605	CD53	NM_001040033.1	1.28	0.248643
IL12RB1	NM_005535.1	1.27	0.489683	NOD1	NM_006092.1	1.06	0.442197	HLA-DMA	NM_006120.3	1.38	0.249514
DMBT1	NM_007329.2	-1.47	0.49025	TICAM1	NM_014261.1	1.05	0.442291	TBK1	NM_013254.2	1.13	0.251848
ANXA1	NM_000700.1	1.1	0.490677	NFKBIA	NM_020529.1	-1.4	0.442664	IL3RA	NM_002183.2	-2.08	0.256081
STAT4	NM_003151.2	1.3	0.49227	USP39	NM_001256725.1	1.03	0.445167	PLA2G1B	NM_000928.2	1.73	0.256892
ITGAM	NM_000632.3	1.14	0.492359	FCGR3A	NM_000569.6	-1.24	0.449185	PIK3CG	NM_002649.2	1.36	0.26365
MAPK3	NM_001040056.1	1.03	0.494611	IL25	NM_022789.2	-1.49	0.450959	CNOT10	NM_001256741.1	1.07	0.265283
PASD1	NM_173493.2	-1.22	0.495434	GNLY	NM_006433.2	-2.11	0.459809	TNFSF13B	NM_006573.4	1.45	0.269028
FLT3LG	NM_001459.3	1.03	0.49683	INPP5D	NM_005541.3	-1.13	0.461102	TRAF3	NM_145725.1	1.11	0.282394
CX3CL1	NM_002996.3	-1.18	0.498293	CD1D	NM_001766.3	1.65	0.462821	TNFRSF11A	NM_003839.2	-2.72	0.282692
SPA17	NM_017425.3	-1.32	0.500495	CCL5	NM_002985.2	1.57	0.465613	NFKB1	NM_003998.2	1.14	0.284912
FOS	NM_005252.2	1.84	0.501413	RPS6	NM_001010.2	1.1	0.467456	C1QBP	NM_001212.3	1.1	0.285676
IL17RA	NM_014339.6	-1.04	0.502222	IKBKG	NM_003639.2	1.09	0.467684	TLK2	NM_006852.2	1.08	0.291182
PRG2	NM_002728.4	1.33	0.503047	CCL4	NM_002984.2	1.28	0.468793	THBD	NM_000361.2	-1.33	0.291434
CD81	NM_004356.3	-1.03	0.50402	MEF2C	NM_002397.3	1.08	0.471128	TOLLIP	NM_019009.2	1.11	0.296521
LTA	NM_000595.2	1.26	0.50523	PDCD1	NM_005018.1	-1.27	0.47115	AMICA1	NM_153206.2	1.27	0.30042
IFNA2	NM_000605.3	1.44	0.505819	ITGB3	NM_000212.2	-1.12	0.47321	IFIT2	NM_001547.4	-1.68	0.301569
S100A8	NM_002964.3	-1.77	0.506706	TNFRSF4	NM_003327.2	-1.25	0.473359	TLR2	NM_003264.3	1.17	0.303603
SELPLG	NM_001206609.1	1.2	0.507011	SH2B2	NM_020979.3	-1.07	0.474143	CCR5	NM_000579.1	2.06	0.305131
STAT3	NM_139276.2	1.07	0.507423	IFITM2	NM_006435.2	-1.11	0.478395	SYK	NM_003177.3	1.34	0.307672
ALCAM	NM_001627.3	1.07	0.510234	CR2	NM_001006658.1	1.45	0.479387	MAPKAPK2	NM_004759.3	1.33	0.309707
TNFSF13B	NM_006573.4	1.39	0.511308	SMAD3	NM_005902.3	1.04	0.481866	IFNA1	NM_024013.1	2.68	0.310346
TNFSF15	NM_001204344.1	1.37	0.51319	PSEN1	NM_000021.2	-1.04	0.489192	GZMH	NM_033423.3	1.47	0.312321
CLEC7A	NM_197954.2	1.39	0.520748	CCR5	NM_000579.1	-1.56	0.491802	TLR1	NM_003263.3	-1.09	0.312794
HLA-DPB1	NM_002121.4	1.16	0.52385	BLK	NM_001715.2	1.2	0.494284	NOS2A	NM_153292.1	-2.84	0.313768
KLRG1	NM_005810.3	1.5	0.526206	CCL24	NM_002991.2	1.2	0.494284	IL16	NM_004513.4	1.28	0.314644
CCND3	NM_001760.2	-1.06	0.527151	CCL28	NM_148672.2	1.2	0.494284	DOCK9	NM_001130048.1	-1.12	0.315884
CD74	NM_001025159.1	1.15	0.527286	CD1B	NM_001764.2	1.2	0.494284	SLAMF1	NM_003037.2	2.12	0.318725
PLAU	NM_002658.2	1.2	0.527799	CMA1	NM_001836.2	1.2	0.494284	CFB	NM_001710.5	-1.36	0.320007
CCR5	NM_000579.1	1.32	0.531755	IL17A	NM_002190.2	1.2	0.494284	TLR3	NM_003265.2	-1.13	0.320159
CTAG1B	NM_001327.2	1.29	0.531881	IL19	NM_013371.3	1.2	0.494284	CSF3R	NM_156038.2	1.37	0.320832
CD200	NM_005944.5	1.12	0.540233	TNFRSF13B	NM_012452.2	1.2	0.494284	CXCR5	NM_001716.3	2.22	0.321291
BST1	NM_004334.2	-1.07	0.541423	USP9Y	NM_004654.3	1.2	0.494284	PRKCD	NM_006254.3	-1.19	0.321739
CD22	NM_001771.2	-1.08	0.541842	NCAM1	NM_000615.5	-1.15	0.494413	PYCARD	NM_013258.3	-1.17	0.324336
TRAF3	NM_145725.1	1.07	0.543988	SLAMF6	NM_001184714.1	-1.76	0.495898	SMAD2	NM_005901.5	1.09	0.324573
MAVS	NM_020746.3	1.03	0.54406	TICAM2	NM_021649.4	-1.09	0.49687	LCP1	NM_002298.4	1.33	0.325625
ITCH	NM_001257138.1	1.03	0.545341	HLA-DQA1	NM_002122.3	4.15	0.498237	SPN	NM_003123.3	1.85	0.326792
REPS1	NM_001128617.2	1.03	0.545466	CCL14	NM_032963.3	1.24	0.502257	IL9	NM_000590.1	1.48	0.329362
PECAM1	NM_000442.3	-1.13	0.546587	LCK	NM_005356.2	-1.32	0.503977	CNOT4	NM_001190848.1	1.06	0.329885
TNFSF18	NM_005092.2	1.35	0.550538	MASP2	NM_139208.1	-1.25	0.505687	IL10RA	NM_001558.2	1.23	0.33059
NOTCH1	NM_017617.3	-1.11	0.551523	NFKB2	NM_002502.2	-1.1	0.508535	IGF1R	NM_000875.2	-1.08	0.330631
TAPBP	NM_003190.4	1.05	0.55327	CD274	NM_014143.3	-1.1	0.510228	MAPK14	NM_001315.1	1.05	0.335588
IFNAR1	NM_000629.2	-1.04	0.554183	JAK1	NM_002227.1	1.03	0.510819	PECAM1	NM_000442.3	-1.23	0.336648
LY96	NM_015364.2	1.06	0.556785	IL15RA	NM_002189.2	-1.15	0.511539	PRM1	NM_002761.2	2.27	0.337334
ALAS1	NM_000688.4	1.05	0.557954	CEACAM6	NM_002483.4	-1.47	0.512382	CDK1	NM_001786.4	-1.36	0.340752
ENG	NM_001114753.1	-1.09	0.558585	AXL	NM_021913.2	-1.05	0.521774	FOS	NM_005252.2	2.87	0.34249
CD14	NM_000591.2	-1.15	0.559128	LILRB1	NM_001081637.1	-1.68	0.522287	SPA17	NM_017425.3	-1.4	0.343155
IL9	NM_000590.1	-1.19	0.562557	SELE	NM_000450.2	1.43	0.524411	HAMP	NM_021175.2	1.26	0.343963
PDGFRB	NM_002609.3	-1.04	0.56305	IL17RA	NM_014339.6	-1.05	0.525255	HLA-DQA1	NM_002122.3	-6.32	0.345
TXNIP	NM_006472.1	1.14	0.568158	IL27	NM_145659.3	-1.31	0.526476	IL1R1	NM_000877.2	-1.46	0.345661
CFI	NM_000204.3	-1.13	0.569161	CXCL11	NM_005409.4	1.85	0.529881	USP39	NM_001256725.1	-1.04	0.350165
PSMB10	NM_002801.2	1.06	0.569494	CTSH	NM_004390.3	-1.08	0.530569	S100B	NM_006272.1	2.04	0.350614
EGR1	NM_001964.2	1.38	0.569604	KIR2DL1	NM_014218.2	1.21	0.53762	BLNK	NM_013314.2	1.51	0.352172
CARD9	NM_052813.4	1.13	0.57045	CD59	NM_000611.4	1.09	0.539765	PDCD1LG2	NM_025239.3	-1.37	0.354857
IFNAR2	NM_000874.3	1.06	0.579755	TNFRSF1B	NM_001066.2	-1.09	0.540059	CCRL2	NM_003965.4	1.38	0.359201
IRF1	NM_002198.1	1.16	0.582041	HLA-B	NM_005514.6	1.18	0.541084	ITGB4	NM_001005731.1	1.26	0.359347
CCL20	NM_004591.1	1.18	0.582178	CD3D	NM_000732.4	-1.1	0.541423	IDO1	NM_002164.3	1.2	0.359962
CD40	NM_001250.4	-1.06	0.587788	CXCL10	NM_001565.1	-1.35	0.542137	HMGB1	NM_002128.4	-1.04	0.362513
EGR2	NM_000399.3	1.39	0.588844	CD36	NM_001001548.2	1.17	0.542753	CXCL12	NM_000609.5	-1.4	0.362667
HLA-DRA	NM_019111.3	1.17	0.592345	G6PD	NM_000402.2	-1.05	0.544929	DUSP6	NM_001946.2	-1.56	0.363916
KIT	NM_000222.2	1.1	0.593409	C1QA	NM_015991.2	1.14	0.545333	MAVS	NM_020746.3	1.08	0.364095
PPIA	NM_021130.2	-1.04	0.593936	HLA-DRA	NM_019111.3	1.19	0.546085	FCGR2A	NM_021642.3	1.27	0.36779
CLU	NM_001831.2	1.26	0.594412	IFIH1	NM_022168.2	1.06	0.546317	IFNAR1	NM_000629.2	-1.06	0.371309
NRP1	NM_003873.5	1.06	0.595183	GAGE1	NM_001040663.2	-1.24	0.549274	ELANE	NM_001972.2	1.28	0.373537
CCL14	NM_032963.3	1.11	0.595335	PVR	NM_006505.3	1.07	0.55004	HLA-DPA1	NM_033554.2	1.22	0.374053
CCR4	NM_005508.4	1.4	0.602534	POLR2A	NM_000937.2	1.05	0.553755	TFRC	NM_003234.1	1.61	0.376093
FLT3	NM_004119.1	1.23	0.602688	TCF7	NM_003202.2	-1.06	0.555659	ATF1	NM_005171.2	1.08	0.377598
INPP5D	NM_005541.3	1.11	0.602811	TFE3	NM_006521.3	1.03	0.556829	SMAD3	NM_005902.3	-1.05	0.381089
IFNA1	NM_024013.1	1.25	0.606195	MAP2K1	NM_002755.2	-1.06	0.561326	C1QB	NM_000491.3	-1.25	0.381719
IL6	NM_000600.1	1.45	0.606645	HLA-DQB1	NM_002123.3	2.79	0.562185	STAT3	NM_139276.2	1.09	0.382283
CTAGE1	NM_172241.2	1.18	0.609845	CD40	NM_001250.4	-1.08	0.563707	ITGB3	NM_000212.2	-1.36	0.383035
TGFB2	NM_003238.2	1.12	0.61131	CSF1R	NM_005211.2	1.18	0.564573	ZC3H14	NM_001160103.1	1.1	0.385854
TNFRSF11B	NM_002546.2	-1.32	0.612977	ZAP70	NM_001079.3	1.12	0.564892	MICA	NM_000247.1	1.11	0.397867
CD68	NM_001251.2	1.11	0.614536	MAP3K7	NM_145333.1	1.02	0.565589	TAP1	NM_000593.5	-1.2	0.400938
FCGR2A	NM_021642.3	1.14	0.615418	DDX50	NM_024045.1	1.03	0.567104	IL12A	NM_000882.2	-1.7	0.406354
PLA2G1B	NM_000928.2	1.24	0.616704	CD163	NM_004244.4	1.17	0.569293	IRF8	NM_002163.2	1.27	0.408716
STAT1	NM_007315.2	-1.12	0.616835	TNFRSF14	NM_003820.2	1.04	0.579344	VEGFC	NM_005429.2	-1.12	0.409868
CDH5	NM_001795.3	1.07	0.621256	TLR10	NM_030956.2	-1.15	0.585042	CKLF	NM_181640.2	1.05	0.41143
CR1	NM_000651.4	1.17	0.622823	MAVS	NM_020746.3	-1.05	0.585705	LILRB2	NM_005874.1	1.39	0.420607
PSMB8	NM_004159.4	-1.04	0.624455	RORC	NM_001001523.1	1.51	0.588268	POU2F2	NM_002698.2	-1.29	0.421972
OSM	NM_020530.4	1.15	0.628878	IFI27	NM_005532.3	1.1	0.59059	CREB1	NM_004379.3	-1.05	0.436829
IL17B	NM_014443.2	-1.21	0.63743	ELANE	NM_001972.2	1.18	0.591178	PASD1	NM_173493.2	1.4	0.439728
TFRC	NM_003234.1	-1.13	0.641284	CD14	NM_000591.2	-1.11	0.592277	CD36	NM_001001548.2	1.12	0.442201
CCRL2	NM_003965.4	-1.18	0.643681	CXCR4	NM_003467.2	-1.13	0.593292	REPS1	NM_001128617.2	1.02	0.444008
AICDA	NM_020661.1	-1.15	0.646183	OAS3	NM_006187.2	1.1	0.593637	LTBR	NM_002342.1	-1.1	0.445792
CCL24	NM_002991.2	-1.15	0.646183	FOS	NM_005252.2	-1.56	0.595712	CD3EAP	NM_012099.1	-1.1	0.448227
CCL28	NM_148672.2	-1.15	0.646183	PDCD1LG2	NM_025239.3	1.29	0.597876	ATG5	NM_004849.2	-1.09	0.4507
CD1B	NM_001764.2	-1.15	0.646183	NLRP3	NM_001079821.2	-1.22	0.598367	IRAK1	NM_001569.3	-1.12	0.45253
LILRB3	NM_006864.2	-1.15	0.646183	HLA-G	NM_002127.4	1.12	0.600337	BAX	NM_138761.3	-1.07	0.45261
TNFRSF13B	NM_012452.2	-1.15	0.646183	BATF	NM_006399.3	-1.47	0.60267	G6PD	NM_000402.2	-1.05	0.452795
USP9Y	NM_004654.3	-1.15	0.646183	F2RL1	NM_005242.3	-1.43	0.603193	DNAJC14	NM_032364.5	-1.19	0.457202
IL10RA	NM_001558.2	1.12	0.646513	SPINK5	NM_006846.3	-1.51	0.604733	MX1	NM_002462.2	-1.16	0.460447
VEGFA	NM_001025366.1	1.08	0.646634	TNFRSF10B	NM_003842.3	-1.31	0.606847	FEZ1	NM_005103.4	-1.08	0.461572
LAIR2	NM_002288.3	1.09	0.647219	CD8A	NM_001768.5	-1.18	0.607298	GAGE1	NM_001040663.2	1.18	0.464208
CASP3	NM_032991.2	-1.03	0.648487	IL2RG	NM_000206.1	-1.27	0.610252	KLRG1	NM_005810.3	-1.56	0.470096
IL22RA2	NM_181310.1	-1.28	0.651294	IFI35	NM_005533.3	1.05	0.610615	MAP3K1	NM_005921.1	1.06	0.471235
IRAK1	NM_001569.3	1.05	0.652355	ST6GAL1	NM_003032.2	-1.07	0.612126	CCL4	NM_002984.2	1.26	0.472143
SPINK5	NM_006846.3	1.22	0.653158	BCL6	NM_001706.2	1.08	0.616127	SPINK5	NM_006846.3	1.83	0.472277
CXCR5	NM_001716.3	1.18	0.653369	FCER1G	NM_004106.1	-1.14	0.61968	STAT5B	NM_012448.3	1.06	0.472919
C3AR1	NM_004054.2	1.11	0.655533	CD38	NM_001775.2	-1.17	0.627157	FCGR2B	NM_001002273.1	1.34	0.474865
CCR7	NM_001838.2	-1.16	0.656781	ATG5	NM_004849.2	-1.06	0.627956	HLA-E	NM_005516.4	-1.08	0.483583
CXCL12	NM_000609.5	1.09	0.659446	CYBB	NM_000397.3	-1.07	0.628428	C1QA	NM_015991.2	-1.2	0.488938
REL	NM_002908.2	1.12	0.660223	CD99	NM_002414.3	1.08	0.628756	ATF2	NM_001256090.1	1.03	0.491824
ITGB2	NM_000211.2	1.14	0.660883	IL10RA	NM_001558.2	-1.1	0.631096	LILRA4	NM_012276.3	1.35	0.493611
KIR3DS1	NM_001083539.1	1.23	0.661858	ISG15	NM_005101.3	1.14	0.631614	HLA-DMB	NM_002118.3	1.15	0.503453
LAMP1	NM_005561.3	1.04	0.664925	C8G	NM_000606.2	-1.07	0.633337	PDGFRB	NM_002609.3	1.04	0.505487
F13A1	NM_000129.3	-1.19	0.665585	SPO11	NM_198265.1	-1.3	0.637665	MAPK1	NM_138957.2	-1.11	0.510343
HLA-DMB	NM_002118.3	-1.1	0.670288	FCGR2A	NM_021642.3	-1.12	0.645632	CD68	NM_001251.2	1.14	0.511851
EBI3	NM_005755.2	1.24	0.676166	SAP130	NM_024545.3	1.03	0.646121	PLAU	NM_002658.2	1.17	0.514349
CD37	NM_001774.2	1.16	0.678097	CTSW	NM_001335.3	-1.18	0.648667	AGK	NM_018238.3	1.06	0.524359
MBL2	NM_000242.2	1.18	0.680762	IL1RAP	NM_002182.2	-1.05	0.657684	CREB5	NM_182898.2	1.18	0.530226
PTPRC	NM_080921.3	-1.15	0.681547	CXCL1	NM_001511.1	-1.13	0.662324	HLA-B	NM_005514.6	-1.16	0.534053
CD33	NM_001177608.1	-1.25	0.686637	MAGEA3	NM_005362.3	-1.17	0.662507	NLRP3	NM_001079821.2	1.23	0.536477
CCL7	NM_006273.2	-1.17	0.686974	LAMP2	NM_001122606.1	-1.04	0.66487	FCER1A	NM_002001.2	-1.8	0.53759
IL17RB	NM_018725.3	1.2	0.68704	PECAM1	NM_000442.3	1.09	0.666406	IL6ST	NM_002184.2	-1.07	0.545969
TP53	NM_000546.2	-1.04	0.690413	CXCR3	NM_001504.1	-1.12	0.669474	CCND3	NM_001760.2	-1.06	0.551272
NFATC1	NM_172389.1	1.07	0.693631	TRAF3	NM_145725.1	-1.04	0.669949	CD96	NM_005816.4	-1.55	0.55406
KIR2DL1	NM_014218.2	1.12	0.699358	KIR3DL1	NM_013289.2	1.36	0.672748	PSMB9	NM_002800.4	1.07	0.554285
PSMB7	NM_002799.2	-1.02	0.700356	STAT5B	NM_012448.3	-1.03	0.677854	IKBKB	NM_001556.1	-1.13	0.557054
BIRC5	NM_001168.2	-1.24	0.701708	MAP3K1	NM_005921.1	-1.03	0.680365	LILRB3	NM_006864.2	1.28	0.560808
CCL2	NM_002982.3	1.2	0.701753	ATG12	NM_004707.2	-1.03	0.683864	C6	NM_000065.2	1.17	0.564137
SLC11A1	NM_000578.2	-1.16	0.702478	IFNGR1	NM_000416.1	1.05	0.685421	CD1D	NM_001766.3	-1.43	0.566845
TNFSF11	NM_003701.2	-1.23	0.703325	TOLLIP	NM_019009.2	-1.04	0.687756	CYBB	NM_000397.3	1.13	0.569956
NUP107	NM_020401.2	-1.02	0.705501	CD40LG	NM_000074.2	-1.09	0.688891	SIGLEC1	NM_023068.3	1.23	0.573978
CXCR1	NM_000634.2	1.09	0.708392	EIF2B4	NM_172195.3	-1.02	0.691098	ITGB2	NM_000211.2	-1.17	0.57398
SYK	NM_003177.3	1.13	0.709527	CLEC4A	NM_194448.2	-1.07	0.692618	HSD11B1	NM_181755.1	1.13	0.574841
CXCL3	NM_002090.2	1.3	0.710606	GZMB	NM_004131.3	-1.23	0.693999	CD4	NM_000616.4	-1.18	0.576014
NOD2	NM_022162.1	1.18	0.71769	MFGE8	NM_001114614.1	-1.06	0.694512	TXNIP	NM_006472.1	1.26	0.58064
MAP3K1	NM_005921.1	1.03	0.722682	IL12RB2	NM_001559.2	1.19	0.697223	F13A1	NM_000129.3	1.24	0.586067
SPN	NM_003123.3	-1.18	0.72383	FCER2	NM_002002.4	1.16	0.698407	CD74	NM_001025159.1	-1.13	0.586577
SYT17	NM_016524.2	1.18	0.725496	EGR2	NM_000399.3	1.39	0.705483	MIF	NM_002415.1	-1.11	0.594099
PNMA1	NM_006029.4	-1.03	0.72851	CCL27	NM_006664.2	-1.1	0.706986	HLA-DPB1	NM_002121.4	1.1	0.595261
STAT5B	NM_012448.3	1.02	0.730278	GZMH	NM_033423.3	-1.13	0.707974	KIR3DL1	NM_013289.2	1.47	0.595756
MYD88	NM_002468.3	-1.04	0.73137	EPCAM	NM_002354.1	1.1	0.709228	EBI3	NM_005755.2	1.36	0.59743
CTSL	NM_001912.4	-1.03	0.733991	HSD11B1	NM_181755.1	-1.08	0.709281	TXK	NM_003328.1	1.4	0.597517
HLA-DQA1	NM_002122.3	-1.52	0.735261	CREB5	NM_182898.2	-1.1	0.716637	KIT	NM_000222.2	1.08	0.602411
CD164	NM_006016.4	-1.02	0.737511	ATF1	NM_005171.2	-1.03	0.720068	PTPRC	NM_080921.3	-1.14	0.60956
ITGA6	NM_000210.1	-1.07	0.741769	IFIT1	NM_001548.3	-1.03	0.722111	TNFRSF14	NM_003820.2	-1.03	0.613076
MAGEA4	NM_001011548.1	1.19	0.743382	TNFRSF11A	NM_003839.2	1.37	0.725478	A2M	NM_000014.4	1.07	0.613391
CD1D	NM_001766.3	1.16	0.74408	CD3E	NM_000733.2	-1.17	0.726376	HLA-G	NM_002127.4	-1.11	0.615115
F12	NM_000505.3	1.2	0.745486	TNFRSF8	NM_152942.2	-1.13	0.72959	ECSIT	NM_001142464.2	-1.06	0.620413
IL18R1	NM_003855.2	-1.12	0.750739	CCL3	NM_002983.2	1.11	0.729813	ICAM1	NM_000201.2	-1.1	0.621468
HLA-DPA1	NM_033554.2	-1.08	0.756822	TPSAB1	NM_003294.3	-1.11	0.732454	C4BPA	NM_000715.3	-1.48	0.622448
CLEC5A	NM_013252.2	-1.17	0.762068	IDO1	NM_002164.3	-1.14	0.738014	HLA-DQB1	NM_002123.3	-2.22	0.629598
DDX58	NM_014314.3	1.04	0.762438	TPTE	NM_199259.2	-1.06	0.743706	IFI27	NM_005532.3	-1.12	0.630265
PRM1	NM_002761.2	-1.11	0.767973	MAP3K5	NM_005923.3	-1.03	0.7456	FCER2	NM_002002.4	-1.15	0.631087
CREB1	NM_004379.3	1.01	0.773855	CASP1	NM_001223.3	-1.06	0.746781	C1S	NM_001734.2	-1.05	0.636973
TNFRSF12A	NM_016639.1	-1.1	0.773979	IGF2R	NM_000876.1	1.01	0.75855	JAM3	NM_032801.3	-1.04	0.637792
IL32	NM_004221.4	1.1	0.7741	MAP2K4	NM_003010.2	1.01	0.758615	MTMR14	NM_022485.3	-1.03	0.639038
GUSB	NM_000181.1	-1.02	0.776823	IFIT2	NM_001547.4	1.16	0.759864	ADORA2A	NM_000675.3	1.1	0.642291
TNFRSF1B	NM_001066.2	-1.04	0.77763	IFNAR1	NM_000629.2	1.02	0.762349	ITGA5	NM_002205.2	1.09	0.642596
CREB5	NM_182898.2	1.07	0.780438	NCR1	NM_004829.5	1.22	0.767358	BATF	NM_006399.3	1.38	0.647349
CD84	NM_001184879.1	-1.07	0.780934	FEZ1	NM_005103.4	-1.04	0.769464	HLA-DRB3	NM_022555.3	1.13	0.647725
NCR1	NM_004829.5	1.12	0.782754	HLA-DRB4	NM_021983.4	-1.67	0.770327	ALAS1	NM_000688.4	1.05	0.650414
SERPING1	NM_000062.2	1.03	0.784714	MS4A2	NM_000139.3	-1.13	0.771188	TICAM1	NM_014261.1	1.04	0.650432
CD9	NM_001769.2	1.04	0.787493	CCR6	NM_031409.2	-1.05	0.772396	FCER1G	NM_004106.1	-1.15	0.650856
CDH1	NM_004360.2	1.08	0.788756	BST2	NM_004335.2	1.04	0.775521	C1R	NM_001733.4	-1.07	0.653378
TGFB1	NM_000660.3	1.05	0.795432	IL7R	NM_002185.2	1.1	0.776996	ATG7	NM_001136031.2	-1.03	0.654476
MNX1	NM_005515.3	-1.13	0.801742	IRAK2	NM_001570.3	-1.1	0.780742	ITGAE	NM_002208.4	1.04	0.661666
LBP	NM_004139.2	1.12	0.810738	GZMK	NM_002104.2	1.12	0.78324	F2RL1	NM_005242.3	1.37	0.66803
IRF5	NM_002200.3	1.12	0.811746	TXNIP	NM_006472.1	-1.11	0.783689	CDH5	NM_001795.3	1.05	0.668795
S100B	NM_006272.1	1.12	0.81189	IL3RA	NM_002183.2	1.15	0.784036	TMEFF2	NM_016192.2	1.27	0.67139
PIK3CD	NM_005026.3	-1.01	0.813017	CCR1	NM_001295.2	-1.06	0.784413	BIRC5	NM_001168.2	1.3	0.676781
STAT6	NM_003153.3	1.01	0.815936	STAT2	NM_005419.2	-1.06	0.793197	CCL5	NM_002985.2	1.3	0.679094
PYCARD	NM_013258.3	-1.04	0.816313	IL34	NM_152456.1	1.1	0.798689	EPCAM	NM_002354.1	-1.15	0.686306
CYBB	NM_000397.3	1.06	0.816753	GPI	NM_000175.2	1.04	0.79899	NFKB2	NM_002502.2	-1.05	0.689302
IL1RAP	NM_002182.2	-1.03	0.81733	IL1RL1	NM_016232.4	-1.06	0.805447	PLAUR	NM_001005376.1	-1.08	0.689845
ENTPD1	NM_001098175.1	1.08	0.820917	NLRC5	NM_032206.4	-1.04	0.807999	BCL2L1	NM_001191.2	1.02	0.696456
ARG2	NM_001172.3	1.14	0.825841	PPBP	NM_002704.2	1.15	0.81166	CD63	NM_001780.4	1.05	0.700124
C1R	NM_001733.4	1.04	0.82855	NCF4	NM_000631.4	-1.04	0.815966	EGR1	NM_001964.2	1.48	0.700775
HSD11B1	NM_181755.1	1.04	0.830087	CTCFL	NM_001269042.1	-1.12	0.81673	HLA-DRB4	NM_021983.4	-2.02	0.703152
COLEC12	NM_130386.2	1.07	0.833593	CMKLR1	NM_004072.1	-1.04	0.821939	HLA-C	NM_002117.4	-1.1	0.704974
AMICA1	NM_153206.2	1.05	0.840471	HLA-DPB1	NM_002121.4	1.05	0.82913	GPI	NM_000175.2	1.06	0.706103
SAA1	NM_199161.1	1.12	0.841897	GPATCH3	NM_022078.2	-1.04	0.830418	CTSL	NM_001912.4	1.04	0.71022
PPBP	NM_002704.2	1.1	0.842878	MERTK	NM_006343.2	1.01	0.833391	TNFRSF1B	NM_001066.2	1.05	0.715717
CD6	NM_006725.3	1.08	0.84383	CD68	NM_001251.2	-1.03	0.833587	CCL14	NM_032963.3	-1.12	0.721609
HLA-DQB1	NM_002123.3	1.25	0.844004	LCP1	NM_002298.4	-1.06	0.835237	IRF3	NM_001571.5	1.04	0.727891
TLR5	NM_003268.3	1.03	0.849684	CD63	NM_001780.4	1.02	0.838576	KLRB1	NM_002258.2	-1.35	0.727972
IL10	NM_000572.2	1.09	0.864585	CDH5	NM_001795.3	1.02	0.838786	MRPS5	NM_031902.3	1.01	0.733204
MICB	NM_005931.3	-1.07	0.867396	CD84	NM_001184879.1	-1.04	0.8441	TANK	NM_004180.2	-1.02	0.736691
C1QA	NM_015991.2	-1.05	0.870554	AICDA	NM_020661.1	-1.08	0.845122	PRPF38A	NM_032864.3	1.02	0.739689
MRC1	NM_002438.2	1.04	0.871777	CXCL2	NM_002089.3	-1.17	0.847861	CTSS	NM_004079.3	1.07	0.739785
CSF1	NM_000757.4	-1.03	0.873921	TXK	NM_003328.1	1.12	0.853255	KIR2DL1	NM_014218.2	-1.08	0.744707
MAPK8	NM_002750.2	-1.01	0.874976	IL8	NM_000584.2	-1.12	0.854743	BCL2	NM_000657.2	1.05	0.746427
SPANXB1	NM_032461.2	-1.09	0.875467	EOMES	NM_005442.2	-1.14	0.856668	EP300	NM_001429.2	1.01	0.746576
CD2	NM_001767.3	-1.06	0.876499	IL16	NM_004513.4	1.02	0.860554	EIF2B4	NM_172195.3	-1.02	0.756734
BATF	NM_006399.3	-1.06	0.87776	STAT3	NM_139276.2	-1.02	0.862956	IL6	NM_000600.1	1.27	0.763584
NT5E	NM_002526.2	-1.02	0.878608	CD33	NM_001177608.1	-1.13	0.869176	MAP2K4	NM_003010.2	-1.01	0.764764
TBP	NM_001172085.1	1.01	0.880328	BAGE	NM_001187.1	1.05	0.869494	NOL7	NM_016167.3	-1.01	0.766028
IDO1	NM_002164.3	1.06	0.882149	ICAM1	NM_000201.2	1.05	0.870025	LRP1	NM_002332.2	-1.05	0.780551
ITGA1	NM_181501.1	-1.03	0.884239	FADD	NM_003824.2	1.02	0.873117	SBNO2	NM_014963.2	-1.03	0.79905
NFATC2	NM_012340.3	-1.03	0.887335	PRF1	NM_005041.3	1.05	0.878407	IL22RA2	NM_181310.1	-1.17	0.802522
EPCAM	NM_002354.1	-1.04	0.88914	IL23A	NM_016584.2	-1.03	0.881386	CD59	NM_000611.4	1.03	0.805081
SERPINB2	NM_002575.1	1.05	0.88993	IL6	NM_000600.1	1.14	0.88266	C2	NM_000063.3	-1.08	0.808489
IKBKE	NM_014002.2	-1.01	0.891758	IL22RA2	NM_181310.1	-1.09	0.884481	ZNF346	NM_012279.2	-1.01	0.811864
TNFRSF14	NM_003820.2	1.01	0.895753	STAT6	NM_003153.3	1.01	0.88967	IFNGR1	NM_000416.1	1.03	0.81291
AKT3	NM_181690.1	1.01	0.897025	EBI3	NM_005755.2	-1.09	0.89028	MRC1	NM_002438.2	1.06	0.813312
GAGE1	NM_001040663.2	-1.05	0.90048	IFNL1	NM_172140.1	-1.06	0.893349	ITGA4	NM_000885.4	-1.07	0.816209
ICAM1	NM_000201.2	-1.04	0.904274	C4BPA	NM_000715.3	1.11	0.895275	CYFIP2	NM_001037332.2	1.05	0.818491
MARCO	NM_006770.3	1.04	0.90812	EP300	NM_001429.2	-1	0.896117	CLEC4A	NM_194448.2	-1.04	0.825691
SMAD3	NM_005902.3	-1	0.909952	HRAS	NM_005343.2	1.02	0.897619	RELB	NM_006509.2	1.05	0.83109
C1QB	NM_000491.3	-1.03	0.913882	MAF	NM_005360.4	-1.02	0.899364	AICDA	NM_020661.1	-1.06	0.850745
PDCD1LG2	NM_025239.3	-1.06	0.915635	KIT	NM_000222.2	1.02	0.901079	CD19	NM_001770.4	1.04	0.854104
MPPED1	NM_001044370.1	-1.05	0.916435	CCND3	NM_001760.2	-1.01	0.901277	NT5E	NM_002526.2	-1.02	0.856194
EP300	NM_001429.2	1	0.917066	CCL11	NM_002986.2	-1.11	0.901972	IL18	NM_001562.2	1.02	0.863987
CNOT4	NM_001190848.1	-1	0.918911	SPA17	NM_017425.3	1.06	0.904774	CASP1	NM_001223.3	-1.03	0.866602
DEFB1	NM_005218.3	1.05	0.920869	IL1R1	NM_000877.2	-1.04	0.909974	IL1RAP	NM_002182.2	1.02	0.866968
MAP2K4	NM_003010.2	-1	0.924791	CCL22	NM_002990.3	-1.03	0.910267	IRAK4	NM_016123.1	1.01	0.869423
CCL26	NM_006072.4	-1.03	0.928868	TAP1	NM_000593.5	1.02	0.917452	CD84	NM_001184879.1	-1.03	0.871436
DUSP6	NM_001946.2	-1.03	0.9311	PLAU	NM_002658.2	1.02	0.923242	BCL10	NM_003921.2	-1.02	0.881093
IL12A	NM_000882.2	-1.03	0.932806	KLRK1	NM_007360.3	-1.03	0.933183	CXCL11	NM_005409.4	1.15	0.881477
SOCS1	NM_003745.1	-1.03	0.932836	TNFSF13B	NM_006573.4	-1.05	0.93412	SAA1	NM_199161.1	1.1	0.884412
HLA-B	NM_005514.6	1.02	0.935989	CCL3L1	NM_021006.4	-1.04	0.934358	CCL21	NM_002989.2	1.09	0.890422
CXCL13	NM_006419.2	1.04	0.938676	ABCB1	NM_000927.3	-1.02	0.937027	CD14	NM_000591.2	-1.03	0.891977
F2RL1	NM_005242.3	-1.04	0.940772	MRC1	NM_002438.2	-1.02	0.940825	SMPD3	NM_018667.3	1.06	0.89305
CSF2	NM_000758.2	-1.03	0.940881	LILRA4	NM_012276.3	1.04	0.941593	CD33	NM_001177608.1	-1.11	0.89576
FCGR2B	NM_001002273.1	1.03	0.941136	EGR1	NM_001964.2	-1.07	0.943878	NCR1	NM_004829.5	-1.08	0.900566
IFI27	NM_005532.3	-1.02	0.945306	TBX21	NM_013351.1	1.02	0.946555	LYN	NM_002350.1	-1.02	0.902188
MME	NM_000902.2	1.03	0.950833	TLR3	NM_003265.2	1.01	0.950312	CD40	NM_001250.4	1.01	0.903857
KIR2DL3	NM_014511.3	1.02	0.951812	REPS1	NM_001128617.2	1	0.950369	YTHDF2	NM_001172828.1	-1.02	0.90872
TLR4	NM_138554.2	1.01	0.953228	CXCR6	NM_006564.1	1.02	0.951311	AKT3	NM_181690.1	1.01	0.909502
USP39	NM_001256725.1	-1	0.953943	HLA-DMA	NM_006120.3	-1.02	0.951926	CD79A	NM_001783.3	-1.06	0.910039
PTGS2	NM_000963.1	-1.03	0.955372	SEMG1	NM_003007.2	-1.03	0.953004	SF3A3	NM_006802.2	1.01	0.914983
TLR6	NM_006068.2	1.01	0.956189	ZC3H14	NM_001160103.1	-1.01	0.957794	CD99	NM_002414.3	1.02	0.916816
IRF7	NM_001572.3	1.01	0.959168	LAG3	NM_002286.5	-1	0.958182	PSMD7	NM_002811.3	1.01	0.918457
ATM	NM_000051.3	1.02	0.961762	ALAS1	NM_000688.4	-1.01	0.959005	LGALS3	NM_001177388.1	-1.01	0.929469
POU2F2	NM_002698.2	-1.01	0.965281	FOXJ1	NM_001454.3	-1.02	0.961067	HCK	NM_002110.2	1.02	0.929612
IL26	NM_018402.1	1.01	0.965525	CLEC4C	NM_203503.1	1.02	0.962642	IL17RA	NM_014339.6	1.01	0.933915
HLA-G	NM_002127.4	1.01	0.96648	FCER1A	NM_002001.2	-1.04	0.968785	CD7	NM_006137.6	-1.03	0.937192
FCER2	NM_002002.4	1.01	0.970956	NT5E	NM_002526.2	1	0.970172	SH2D1A	NM_001114937.2	1.02	0.939505
IL4R	NM_000418.2	1.01	0.978933	CXCL9	NM_002416.1	1.01	0.973156	HLA-DRA	NM_019111.3	-1.02	0.941328
NOS2A	NM_153292.1	-1.01	0.981451	SLAMF1	NM_003037.2	-1.02	0.974262	LILRB1	NM_001081637.1	-1.06	0.942198
TAP2	NM_000544.3	-1	0.983003	ITGAX	NM_000887.3	1.01	0.976775	PPBP	NM_002704.2	-1.04	0.943313
TREM2	NM_018965.3	-1	0.985103	SAA1	NM_199161.1	1.02	0.97694	ABCF1	NM_001090.2	1	0.951037
CD209	NM_021155.2	1.01	0.986019	CD53	NM_001040033.1	-1.01	0.978464	TNFSF13	NM_003808.3	-1.01	0.95747
TTK	NM_003318.3	1.01	0.987104	AKT3	NM_181690.1	1	0.980522	NCAM1	NM_000615.5	1.01	0.969485
NLRP3	NM_001079821.2	1	0.988183	MAGEA12	NM_001166386.1	-1.01	0.983767	BCL6	NM_001706.2	1.01	0.974485
VCAM1	NM_001078.3	1	0.998589	GZMA	NM_006144.2	-1.01	0.985153	STAT6	NM_003153.3	1	0.994945
MAGEA1	NM_004988.4	-1	0.999878	PTPRC	NM_080921.3	-1	0.987572	EGR2	NM_000399.3	1.01	0.995321

## Sheet: P-value sorted
Probe Name	Accession #	Fibrotic vs. Non-fibrotic	P value of: Fibrotic vs. Non-fibrotic	Probe Name	Accession #	Fibrotic vs. metformin	P value of: Fibrotic vs. metformin	Probe Name	Accession #	metformin vs. Non-fibrotic	P value of: metformin vs. Non-fibrotic
GZMB	NM_004131.3	6.69	0.00315981	ARG2	NM_001172.3	-10.03	0.0222369	CFD	NM_001928.2	20.37	8.761e-05
CD207	NM_015717.2	6.06	0.00041555	CD244	NM_016382.2	-8.02	0.00699851	TREM1	NM_018643.3	11.42	0.00087181
DUSP4	NM_057158.2	5.9	0.0008559	SPANXB1	NM_032461.2	-5.31	0.0230422	ARG2	NM_001172.3	11.42	0.020466
CCL22	NM_002990.3	5.73	0.00282134	F12	NM_000505.3	-4.83	0.0181372	CCL1	NM_002981.1	11.15	8.958e-05
KLRK1	NM_007360.3	5.68	0.00558345	CFD	NM_001928.2	-4.68	0.0369195	KLRC2	NM_002260.3	10.84	3.856e-05
KLRC2	NM_002260.3	5.58	0.00177139	MNX1	NM_005515.3	-4.5	0.00679192	C9	NM_001737.3	10.57	3.525e-05
LIF	NM_002309.3	5.29	0.0209551	CCL25	NM_005624.2	-4.25	0.00821585	GNLY	NM_006433.2	10.05	0.0481403
CCL1	NM_002981.1	5.21	0.00128462	CD28	NM_001243078.1	-3.94	0.0115938	IL1A	NM_000575.3	9.94	0.00016807
CEACAM6	NM_002483.4	5.09	0.00177735	MAGEA4	NM_001011548.1	-3.82	0.0271424	IFNA8	NM_002170.3	9.48	0.0024599
CXCL2	NM_002089.3	5.09	0.0491696	IL1A	NM_000575.3	-3.67	0.0327338	GATA3	NM_001002295.1	9.26	0.00023471
XCL2	NM_003175.3	5.02	0.00530001	PRG2	NM_002728.4	-3.6	0.00215545	CD70	NM_001252.2	9.1	0.00054393
IL18RAP	NM_003853.2	4.94	0.00312603	C9	NM_001737.3	-3.54	0.0108698	CCL13	NM_005408.2	8.87	0.00022255
IL12RB2	NM_001559.2	4.92	0.00321813	SOCS1	NM_003745.1	-3.51	0.010721	CD207	NM_015717.2	8.79	0.00043524
GNLY	NM_006433.2	4.77	0.0399457	IL1B	NM_000576.2	-3.43	0.00380705	IL5	NM_000879.2	8.7	0.00149471
TIGIT	NM_173799.2	4.72	0.00985614	TNFSF15	NM_001204344.1	-3.42	0.00601636	IL22	NM_020525.4	8.62	0.00067532
KIR2DS1	NM_014512.1	4.51	0.00911542	BLNK	NM_013314.2	-3.3	0.0263979	IFNL2	NM_172138.1	8.3	0.00059882
IL23A	NM_016584.2	4.45	0.00474148	APOE	NM_000041.2	-3.26	0.00627951	SSX4	NM_005636.3	8.29	0.00971808
CD8B	NM_004931.3	4.44	0.00204603	IL17RB	NM_018725.3	-3.11	0.0311018	GZMB	NM_004131.3	8.25	0.00116039
CD38	NM_001775.2	4.39	0.00940086	TNFRSF9	NM_001561.4	-3.08	0.0239042	CXCR2	NM_001557.2	8.09	0.00036403
IL1RL1	NM_016232.4	4.38	0.00426805	SLC11A1	NM_000578.2	-2.91	0.0162483	IL18RAP	NM_003853.2	7.93	0.00062235
CD70	NM_001252.2	4.29	0.00879411	IL21R	NM_021798.2	-2.78	0.0363219	DUSP4	NM_057158.2	7.72	0.00047843
CD247	NM_198053.1	4.26	0.0104644	CXCR2	NM_001557.2	-2.77	0.0315571	KIR2DS1	NM_014512.1	7.72	0.00108381
MAGEA3	NM_005362.3	4.24	0.00388995	TREM1	NM_018643.3	-2.76	0.0251234	CCR3	NM_001837.2	7.7	0.0005114
CD1A	NM_001763.2	4.24	0.00723457	CCL13	NM_005408.2	-2.71	0.0366795	CCL25	NM_005624.2	7.65	9.73e-06
IL22	NM_020525.4	4.23	0.00609145	DEFB1	NM_005218.3	-2.69	0.0428956	CCL18	NM_002988.2	7.64	0.00249355
TREM1	NM_018643.3	4.13	0.0266248	C8A	NM_000562.2	-2.6	0.0278078	CCL19	NM_006274.2	7.52	0.00067751
KIR3DL2	NM_006737.2	4.09	0.0130875	CTAGE1	NM_172241.2	-2.53	0.0134484	CEACAM6	NM_002483.4	7.49	0.0118665
CCL19	NM_006274.2	4.08	0.00772379	ARG1	NM_000045.2	-2.51	0.0222435	TAL1	NM_003189.2	7.47	0.00091751
GZMK	NM_002104.2	4.01	0.0230263	S100A12	NM_005621.1	-2.5	0.0255816	IRGM	NM_001145805.1	7.44	0.00019003
PDCD1	NM_005018.1	3.99	0.00960479	IL1R2	NM_173343.1	-2.46	0.00950429	IL2	NM_000586.2	7.3	0.00318036
GATA3	NM_001002295.1	3.98	0.00875411	IL17F	NM_052872.3	-2.43	0.0282808	C8A	NM_000562.2	7.18	0.00033534
CTCFL	NM_001269042.1	3.94	0.00775262	MEFV	NM_000243.2	-2.43	0.0327306	GZMM	NM_005317.2	7.01	0.00196768
IFNA8	NM_002170.3	3.94	0.0347692	IFNA2	NM_000605.3	-2.42	0.0313318	IL24	NM_181339.1	6.98	0.00013397
ICOS	NM_012092.2	3.93	0.0391916	CCR3	NM_001837.2	-2.41	0.0175932	S100A12	NM_005621.1	6.97	0.00117906
KIR3DL3	NM_153443.3	3.91	0.0148129	FUT5	NM_002034.2	-2.39	0.0346084	KIR3DL2	NM_006737.2	6.84	0.00122276
SELE	NM_000450.2	3.87	0.0317149	TAL1	NM_003189.2	-2.38	0.0183378	IL17F	NM_052872.3	6.84	0.00426362
IL5	NM_000879.2	3.86	0.0274992	CTSG	NM_001911.2	-2.38	0.0428217	XCL2	NM_003175.3	6.61	0.0022522
IL25	NM_022789.2	3.85	0.00404705	PBK	NM_018492.2	-2.36	0.0348478	IL1B	NM_000576.2	6.6	0.00693381
CCL18	NM_002988.2	3.84	0.0267835	IL21	NM_021803.2	-2.36	0.0443492	IL1R2	NM_173343.1	6.55	0.00127751
CCL16	NM_004590.2	3.83	0.0113387	GATA3	NM_001002295.1	-2.33	0.029316	CCL16	NM_004590.2	6.45	0.00175644
IL12B	NM_002187.2	3.83	0.0192587	ATM	NM_000051.3	-2.31	0.0293514	IFNB1	NM_002176.2	6.41	0.00121162
MAGEC2	NM_016249.3	3.81	0.0141275	IFNL2	NM_172138.1	-2.29	0.0455709	ARG1	NM_000045.2	6.36	0.00290967
IL24	NM_181339.1	3.78	0.00152071	IRF4	NM_002460.1	-2.28	0.0437199	CD80	NM_005191.3	6.33	0.0026093
MASP2	NM_139208.1	3.78	0.0111311	CXCL5	NM_002994.3	-2.27	0.00434485	CD1A	NM_001763.2	6.18	0.00163659
TLR10	NM_030956.2	3.73	0.0218357	IL7	NM_000880.2	-2.25	0.0135416	IL21	NM_021803.2	6.15	0.00359673
CXCL14	NM_004887.4	3.73	0.035125	IL5	NM_000879.2	-2.25	0.0421333	IL12B	NM_002187.2	6.09	0.00585106
LCN2	NM_005564.3	3.71	0.0107502	FPR2	NM_001462.3	-2.24	0.0328509	CD28	NM_001243078.1	6.07	7.305e-05
GZMM	NM_005317.2	3.69	0.0233135	CD80	NM_005191.3	-2.21	0.00876269	IL13	NM_002188.2	6.05	0.00158022
TNFRSF17	NM_001192.2	3.63	0.00532575	CCL26	NM_006072.4	-2.21	0.0208744	MEFV	NM_000243.2	5.92	0.00219152
IFNL2	NM_172138.1	3.62	0.0219567	CCL1	NM_002981.1	-2.14	0.0169987	CCL22	NM_002990.3	5.92	0.0023412
CCL17	NM_002987.2	3.48	0.0217811	LTK	NM_001135685.1	-2.14	0.0397099	KLRK1	NM_007360.3	5.87	0.00310429
CXCR3	NM_001504.1	3.47	0.011304	CD70	NM_001252.2	-2.12	0.0393778	ICOS	NM_012092.2	5.85	0.0112039
SPO11	NM_198265.1	3.35	0.00940019	POU2AF1	NM_006235.2	-2.12	0.0427562	F12	NM_000505.3	5.8	0.00448436
CD48	NM_001778.2	3.32	0.0271951	SH2D1B	NM_053282.4	-2.11	0.0258692	MAGEC2	NM_016249.3	5.75	0.0017635
IL2	NM_000586.2	3.28	0.0106622	CCR4	NM_005508.4	-2.1	0.0349982	IL25	NM_022789.2	5.72	0.0152386
CCL13	NM_005408.2	3.28	0.0337014	OSM	NM_020530.4	-2.08	0.0258341	APOE	NM_000041.2	5.7	0.00072822
SPACA3	NM_173847.3	3.23	0.0138671	IL22	NM_020525.4	-2.04	0.00157682	CD8B	NM_004931.3	5.66	0.00084266
CCR3	NM_001837.2	3.19	0.0193515	CD6	NM_006725.3	-2.03	0.046344	CD247	NM_198053.1	5.65	0.00345745
IRGM	NM_001145805.1	3.19	0.0309169	IL23R	NM_144701.2	-1.99	0.0251811	CRP	NM_000567.2	5.61	0.00429494
CXCL10	NM_001565.1	3.19	0.0327857	IL26	NM_018402.1	-1.99	0.0377339	TIGIT	NM_173799.2	5.57	0.005907
IL13	NM_002188.2	3.18	0.0185931	TNFRSF10C	NM_003841.3	-1.94	0.0458365	LAMP3	NM_014398.3	5.54	0.0305407
CXCL9	NM_002416.1	3.18	0.0357236	TNFRSF13C	NM_052945.3	-1.94	0.0478853	ITK	NM_005546.3	5.53	0.00335698
IL2RB	NM_000878.2	3.15	0.0254753	CD83	NM_004233.3	-1.91	0.013792	LILRA5	NM_181879.2	5.4	0.00374535
TAL1	NM_003189.2	3.14	0.029296	IL13	NM_002188.2	-1.9	0.0235848	CSF3	NM_000759.3	5.37	0.00142194
CCL11	NM_002986.2	3.13	0.0162212	IL2RA	NM_000417.1	-1.89	0.0394031	TNFRSF18	NM_004195.2	5.36	0.00040201
IL3	NM_000588.3	3.12	0.00386717	CR1	NM_000651.4	-1.86	0.0413153	CCR9	NM_031200.1	5.33	0.00556496
IFNB1	NM_002176.2	3.12	0.0338316	CXCR1	NM_000634.2	-1.82	0.00715122	FUT5	NM_002034.2	5.28	0.00058903
LILRA5	NM_181879.2	3.08	0.0327979	DNAJC14	NM_032364.5	-1.81	0.0402977	CTSG	NM_001911.2	5.24	0.00614578
AMBP	NM_001633.3	3.06	0.00487556	C6	NM_000065.2	-1.79	0.00402562	SPACA3	NM_173847.3	5.19	0.00193569
MAGEA12	NM_001166386.1	3.04	0.00699829	TNFRSF18	NM_004195.2	-1.79	0.0338161	KIR3DL3	NM_153443.3	5.19	0.00649999
TNFRSF18	NM_004195.2	3	0.00695081	ISG20	NM_002201.4	-1.77	0.0189462	SH2D1B	NM_053282.4	5.17	0.00185145
LTF	NM_002343.2	3	0.032832	LILRA5	NM_181879.2	-1.76	0.048821	CD38	NM_001775.2	5.14	0.00330228
C9	NM_001737.3	2.98	0.0328138	CD1E	NM_001042583.1	-1.75	0.0257562	IL23R	NM_144701.2	5.12	0.00107744
IFNA17	NM_021268.2	2.93	0.041132	TLR5	NM_003268.3	-1.72	0.00410986	PDCD1	NM_005018.1	5.06	0.00210601
CD80	NM_005191.3	2.86	0.0456756	LAIR2	NM_002288.3	-1.67	0.0141044	CCL17	NM_002987.2	4.98	0.0087637
CT45A1	NM_001017417.1	2.83	0.00326445	RAG1	NM_000448.2	-1.67	0.0254434	PBK	NM_018492.2	4.97	0.006395
IL22RA1	NM_021258.2	2.81	0.00783956	LRRN3	NM_001099660.1	-1.65	0.00545099	MAGEA3	NM_005362.3	4.96	0.0041575
TPTE	NM_199259.2	2.81	0.0266959	NOTCH1	NM_017617.3	-1.64	0.0114999	HLA-DOB	NM_002120.3	4.92	0.0283543
PRF1	NM_005041.3	2.76	0.00543803	ITGA2B	NM_000419.3	-1.64	0.0122671	SPANXB1	NM_032461.2	4.89	0.0205966
C8A	NM_000562.2	2.76	0.0383058	CT45A1	NM_001017417.1	-1.64	0.0161861	TNFRSF17	NM_001192.2	4.88	0.00571479
CD79B	NM_021602.2	2.7	0.0127017	VCAM1	NM_001078.3	-1.64	0.0164446	LCN2	NM_005564.3	4.83	0.0014522
ITGB4	NM_001005731.1	2.7	0.0139739	IFNA7	NM_021057.2	-1.64	0.0168749	PRG2	NM_002728.4	4.8	0.00161121
CSF3	NM_000759.3	2.68	0.0452966	CLEC7A	NM_197954.2	-1.63	0.036965	IFNA17	NM_021268.2	4.79	0.00322119
IL1R2	NM_173343.1	2.66	0.0477892	RORA	NM_134261.2	-1.62	0.00037069	MASP2	NM_139208.1	4.72	0.00221285
CEACAM1	NM_001712.3	2.62	0.0380972	CARD9	NM_052813.4	-1.61	0.0321138	LY9	NM_001033667.1	4.69	0.00546497
ULBP2	NM_025217.2	2.6	0.0210904	IRF8	NM_002163.2	-1.59	0.041489	TNFSF15	NM_001204344.1	4.68	0.00379808
C8G	NM_000606.2	2.59	0.00162364	TLR9	NM_017442.2	-1.55	0.00438814	IL1RL1	NM_016232.4	4.66	0.00283588
IL23R	NM_144701.2	2.58	0.0309901	ADORA2A	NM_000675.3	-1.55	0.0325309	IL21R	NM_021798.2	4.66	0.00753287
IL5RA	NM_000564.3	2.55	0.0189864	VEGFA	NM_001025366.1	-1.54	0.00649119	CT45A1	NM_001017417.1	4.62	0.00024808
CD1E	NM_001042583.1	2.54	0.0114849	TREM2	NM_018965.3	-1.52	0.0434614	IL23A	NM_016584.2	4.59	0.00435166
CD79A	NM_001783.3	2.53	0.0301832	IFITM1	NM_003641.3	-1.48	0.0316676	TNFRSF13C	NM_052945.3	4.57	0.0053657
CD24	NM_013230.2	2.52	0.0479246	MICA	NM_000247.1	-1.47	0.0198636	LTF	NM_002343.2	4.55	0.00323347
ITGAL	NM_002209.2	2.51	0.0046019	BTK	NM_000061.1	-1.47	0.0269135	MAGEA4	NM_001011548.1	4.53	0.00595847
DDX43	NM_018665.2	2.47	0.0181383	JAK3	NM_000215.2	-1.4	0.0048125	ULBP2	NM_025217.2	4.5	0.0003579
ICOSLG	NM_015259.4	2.37	0.0304064	MR1	NM_001531.2	-1.39	0.00367473	TNFRSF9	NM_001561.4	4.49	0.00171999
HLA-A	NM_002116.5	2.35	0.00020395	C5	NM_001735.2	-1.38	0.00455252	LTK	NM_001135685.1	4.44	0.00305817
MAGEB2	NM_002364.4	2.35	0.042842	TBK1	NM_013254.2	-1.33	0.030058	CD1E	NM_001042583.1	4.43	0.00074809
FOXP3	NM_014009.3	2.31	0.0365722	LGALS3	NM_001177388.1	-1.29	0.00932225	IRF4	NM_002460.1	4.43	0.00253964
CD3D	NM_000732.4	2.28	0.0357355	PSEN2	NM_000447.2	-1.28	0.00094252	CXCL5	NM_002994.3	4.4	0.00363069
SEMG1	NM_003007.2	2.27	0.0274481	IRF2	NM_002199.3	-1.28	0.0360785	AIRE	NM_000383.2	4.4	0.0048178
PMCH	NM_002674.2	2.22	0.0496624	CHUK	NM_001278.3	-1.22	0.0346314	CTCFL	NM_001269042.1	4.4	0.0140448
ROPN1	NM_017578.2	2.2	0.0140913	MYD88	NM_002468.3	-1.2	0.00282964	MAGEC1	NM_005462.4	4.38	0.0154262
SLAMF6	NM_001184714.1	2.18	0.029476	DOCK9	NM_001130048.1	-1.2	0.00496461	IL3	NM_000588.3	4.35	0.00665908
CCL27	NM_006664.2	2.11	0.0329931	CD164	NM_006016.4	-1.2	0.0150687	SPO11	NM_198265.1	4.34	0.0383293
PTGDR2	NM_004778.1	2.11	0.0428376	CASP3	NM_032991.2	-1.2	0.0232463	CXCL10	NM_001565.1	4.3	0.0178382
CSF2RB	NM_000395.2	2.06	0.0197986	ANP32B	NM_006401.2	-1.17	0.019658	TLR10	NM_030956.2	4.29	0.0117549
ZAP70	NM_001079.3	1.99	0.02452	NFATC3	NM_004555.2	-1.16	0.0318815	CEACAM1	NM_001712.3	4.2	0.020636
TNFRSF10B	NM_003842.3	1.96	0.00048611	SDHA	NM_004168.1	-1.15	0.0428579	FCGR1A	NM_000566.3	4.18	0.014286
BAGE	NM_001187.1	1.91	0.0458651	MAPK14	NM_001315.1	-1.12	0.0297973	ICAM4	NM_001039132.1	4.14	0.00676208
TNFSF8	NM_001244.3	1.86	0.0469868	ITCH	NM_001257138.1	-1.1	0.0261818	AMBP	NM_001633.3	4.13	0.00052716
CD274	NM_014143.3	1.83	0.018734	ABL1	NM_005157.3	-1.05	0.0478775	IL12RB2	NM_001559.2	4.12	0.0258043
CCR6	NM_031409.2	1.81	0.0223894	PSMD7	NM_002811.3	1.07	0.0441081	MS4A1	NM_152866.2	4.11	0.0160092
TBX21	NM_013351.1	1.79	0.0248194	HMGB1	NM_002128.4	1.14	0.00519765	IL1RN	NM_000577.3	4.1	0.0180097
MST1R	NM_002447.1	1.78	0.0109304	TBP	NM_001172085.1	1.14	0.0271591	IL2RB	NM_000878.2	4.09	0.00708919
CSF1R	NM_005211.2	1.78	0.0395252	PSMB7	NM_002799.2	1.15	0.0027278	POU2AF1	NM_006235.2	3.99	0.00983167
MAPKAPK2	NM_004759.3	1.71	4.642e-05	FLT3LG	NM_001459.3	1.15	0.019824	MNX1	NM_005515.3	3.97	0.00262579
CD163	NM_004244.4	1.63	0.0312309	MAPK3	NM_001040056.1	1.17	0.0236055	KLRF1	NM_016523.1	3.96	0.00152938
CD58	NM_001779.2	1.6	0.00373288	MRPS5	NM_031902.3	1.18	0.002875	FLT3	NM_004119.1	3.96	0.0403309
TRIM39	NM_021253.3	1.58	0.00047323	ZNF346	NM_012279.2	1.18	0.0218453	MAGEB2	NM_002364.4	3.95	0.00573819
PSMB9	NM_002800.4	1.58	0.00082892	IL6ST	NM_002184.2	1.19	0.0468271	TARP	NM_001003799.1	3.95	0.00643033
CD83	NM_004233.3	1.56	0.0437708	TYK2	NM_003331.3	1.2	0.00931518	PMCH	NM_002674.2	3.9	0.00334413
CC2D1B	NM_032449.2	1.55	0.0241313	PLA2G6	NM_001004426.1	1.21	0.0310079	CXCR3	NM_001504.1	3.88	0.00603508
BCL2	NM_000657.2	1.5	0.0115487	TRAF2	NM_021138.3	1.22	0.0394269	PTGDR2	NM_004778.1	3.86	0.00020825
MEF2C	NM_002397.3	1.48	0.00017912	ATG10	NM_001131028.1	1.23	0.0419741	IL5RA	NM_000564.3	3.78	0.00183913
LRRN3	NM_001099660.1	1.48	0.0275072	LY96	NM_015364.2	1.25	0.0146582	FUT7	NM_004479.3	3.76	0.00278373
IL15	NM_172174.1	1.47	0.0303448	PSMB8	NM_004159.4	1.27	0.0426252	CD160	NM_007053.2	3.74	0.0155439
TCF7	NM_003202.2	1.44	0.0224954	IGF1R	NM_000875.2	1.29	0.0385604	IL17RB	NM_018725.3	3.71	0.0252544
CYFIP2	NM_001037332.2	1.44	0.0397549	TAB1	NM_153497.2	1.3	0.00032225	IL2RA	NM_000417.1	3.63	0.0160674
ITGA5	NM_002205.2	1.43	0.0247072	LAMP1	NM_005561.3	1.32	0.0256789	FPR2	NM_001462.3	3.6	0.00015615
PVR	NM_006505.3	1.42	0.00599984	PRKCE	NM_005400.2	1.33	0.0107774	GZMK	NM_002104.2	3.58	0.0366742
RPS6	NM_001010.2	1.41	0.00210674	ECSIT	NM_001142464.2	1.33	0.0415036	CAMP	NM_004345.3	3.55	0.022508
CREBBP	NM_004380.2	1.41	0.00387184	BAX	NM_138761.3	1.34	0.0127669	IFNA2	NM_000605.3	3.47	0.0355268
SH2B2	NM_020979.3	1.41	0.0171803	IFNAR2	NM_000874.3	1.36	0.00641545	TNFRSF10C	NM_003841.3	3.46	0.00808085
ABCB1	NM_000927.3	1.33	0.0143339	BST1	NM_004334.2	1.36	0.011618	CD3G	NM_000073.2	3.45	0.0188442
MIF	NM_002415.1	1.33	0.0311074	IRF7	NM_001572.3	1.38	0.0439471	IL4	NM_000589.2	3.43	0.0221371
SAP130	NM_024545.3	1.29	0.00153676	NFATC4	NM_001136022.2	1.41	0.00266596	PAX5	NM_016734.1	3.42	0.0160788
AMMECR1L	NM_001199140.1	1.28	8.246e-05	IFI16	NM_005531.1	1.42	0.0102963	SOCS1	NM_003745.1	3.41	0.00816333
ZNF205	NM_001031686.1	1.27	0.0467254	BCL2	NM_000657.2	1.42	0.0377153	CD24	NM_013230.2	3.36	0.00575649
ECSIT	NM_001142464.2	1.26	0.00160517	ITGA1	NM_181501.1	1.43	0.0440521	FOXP3	NM_014009.3	3.35	0.00524203
MAP2K1	NM_002755.2	1.26	0.00167538	PSMB9	NM_002800.4	1.47	0.0114098	CD86	NM_175862.3	3.35	0.00672073
BAX	NM_138761.3	1.26	0.00349172	IL13RA1	NM_001560.2	1.5	0.00357375	CEACAM8	NM_001816.3	3.32	0.0125707
LRP1	NM_002332.2	1.25	0.00940653	TUBB	NM_178014.2	1.53	0.0001015	NEFL	NM_006158.3	3.24	0.00784742
FAS	NM_000043.3	1.25	0.0378034	IL6R	NM_000565.2	1.53	0.00406567	ROPN1	NM_017578.2	3.21	0.00106813
IL6R	NM_000565.2	1.25	0.0434059	BMI1	NM_005180.5	1.55	0.00600077	CDKN1A	NM_000389.2	3.17	0.0147517
AGK	NM_018238.3	1.23	0.00337699	APP	NM_000484.3	1.56	0.0218923	IL27	NM_145659.3	3.16	0.0380188
DDX50	NM_024045.1	1.22	0.00268673	FAS	NM_000043.3	1.57	0.00017376	ICOSLG	NM_015259.4	3.15	0.00247263
SMAD2	NM_005901.5	1.21	0.00812729	DDX58	NM_014314.3	1.59	0.00128053	CXCL9	NM_002416.1	3.13	0.00618978
TFE3	NM_006521.3	1.2	0.00207213	FYN	NM_002037.3	1.6	0.00687804	CD27	NM_001242.4	3.13	0.0282403
NOD1	NM_006092.1	1.2	0.0293765	CD55	NM_000574.3	1.62	0.00012985	C8B	NM_000066.2	3.1	0.0240542
NFATC4	NM_001136022.2	1.2	0.0390708	ANXA1	NM_000700.1	1.65	0.0324255	IL7	NM_000880.2	3.08	0.00453345
ATG16L1	NM_198890.2	1.2	0.0426739	PDGFC	NM_016205.2	1.67	0.0197262	CTAGE1	NM_172241.2	2.99	0.00027162
LTBR	NM_002342.1	1.2	0.0473085	ZNF205	NM_001031686.1	1.72	0.0162978	CD83	NM_004233.3	2.98	0.00045175
MRPS5	NM_031902.3	1.19	4.597e-05	NRP1	NM_003873.5	1.78	0.0137275	TPTE	NM_199259.2	2.98	0.0193943
ITGAE	NM_002208.4	1.18	0.0252769	TGFB2	NM_003238.2	1.79	0.00755518	SPP1	NM_000582.2	2.88	0.0363826
C1QBP	NM_001212.3	1.17	0.0272404	CASP8	NM_001228.4	1.8	2.27e-06	CSF2RB	NM_000395.2	2.83	0.00089519
ZNF346	NM_012279.2	1.17	0.0388144	PPARG	NM_015869.3	1.84	0.00282859	IFNA7	NM_021057.2	2.81	0.00106962
CNOT10	NM_001256741.1	1.16	0.0217325	CD200	NM_005944.5	1.86	0.0175	DEFB1	NM_005218.3	2.81	0.00187709
ATG7	NM_001136031.2	1.15	0.00097544	COL3A1	NM_000090.3	1.9	0.00440443	SYCP1	NM_003176.2	2.81	0.0128443
TAB1	NM_153497.2	1.15	0.00269037	FN1	NM_212482.1	1.95	0.024869	CTSW	NM_001335.3	2.81	0.0188732
TLK2	NM_006852.2	1.15	0.00356748	THY1	NM_006288.2	1.96	0.0496209	SYT17	NM_016524.2	2.81	0.0248465
SF3A3	NM_006802.2	1.14	0.00096526	MCAM	NM_006500.2	1.97	0.0484772	CLEC6A	NM_001007033.1	2.81	0.0481173
BCL10	NM_003921.2	1.14	0.0455051	RUNX1	NM_001754.4	2.03	0.0103856	CD8A	NM_001768.5	2.79	0.0470763
ATF2	NM_001256090.1	1.1	0.0104777	COLEC12	NM_130386.2	2.08	0.0288857	C8G	NM_000606.2	2.77	0.001028
PSEN1	NM_000021.2	-1.15	0.00032391	THBD	NM_000361.2	2.09	0.0302345	SELL	NR_029467.1	2.76	0.0143089
ATG5	NM_004849.2	-1.15	0.0203109	TLR4	NM_138554.2	2.12	0.00341281	CD1C	NM_001765.2	2.73	0.0143363
GTF3C1	NM_001520.3	-1.17	0.0122049	CD9	NM_001769.2	2.14	0.00023142	CD180	NM_005582.2	2.72	0.00468163
TBK1	NM_013254.2	-1.18	0.0308231	ITGB4	NM_001005731.1	2.15	0.0362366	KLRC1	NM_002259.3	2.71	0.00034563
JAK2	NM_004972.2	-1.2	0.0234349	IL32	NM_004221.4	2.2	0.0307761	CTAG1B	NM_001327.2	2.67	0.0268958
TIRAP	NM_148910.2	-1.23	0.0190908	CDH1	NM_004360.2	2.41	0.00393378	PRF1	NM_005041.3	2.63	0.00296286
LAMP2	NM_001122606.1	-1.25	0.0313377	CFI	NM_000204.3	2.78	0.00087242	BTLA	NM_181780.2	2.63	0.0131442
IKBKG	NM_003639.2	-1.27	0.00905758	TNFSF10	NM_003810.2	2.95	0.00022344	CCR2	NM_001123041.2	2.57	0.0102156
MAPK1	NM_138957.2	-1.3	0.00025541	CCL21	NM_002989.2	3.01	0.0198129	S100A7	NM_002963.2	2.56	0.0385809
LGALS3	NM_001177388.1	-1.3	0.00166912	IL4R	NM_000418.2	3.12	0.00582745	CD3D	NM_000732.4	2.51	0.0205997
IGF2R	NM_000876.1	-1.3	0.00837108	DPP4	NM_001935.3	3.58	0.027462	SLC11A1	NM_000578.2	2.5	0.00251273
CX3CR1	NM_001337.3	-1.31	0.0294056	KLRD1	NM_002262.3	3.86	0.0307249	CHIT1	NM_003465.2	2.5	0.0489561
TMUB2	NM_024107.2	-1.32	0.00539842	C3	NM_000064.2	4.15	0.0333984	LRRN3	NM_001099660.1	2.45	0.00030209
ERCC3	NM_000122.1	-1.33	0.00532376	TNFSF14	NM_003807.3	6.11	0.018825	CLU	NM_001831.2	2.44	0.0241186
BMI1	NM_005180.5	-1.33	0.00548149					BID	NM_001196.2	2.41	0.0215533
ABL1	NM_005157.3	-1.34	0.00959618					OSM	NM_020530.4	2.4	0.0017076
DOCK9	NM_001130048.1	-1.35	0.0281598					ATM	NM_000051.3	2.35	0.00523456
ATG10	NM_001131028.1	-1.36	0.00290454					TNFAIP3	NM_006290.2	2.35	0.034421
AXL	NM_021913.2	-1.36	0.0293876					CCL27	NM_006664.2	2.33	0.01544
PIN1	NM_006221.2	-1.37	0.00222207					IL22RA1	NM_021258.2	2.33	0.0214157
ZKSCAN5	NM_014569.3	-1.37	0.00675908					ISG20	NM_002201.4	2.32	0.00112146
MAPK11	NM_002751.5	-1.44	0.0146043					ADA	NM_000022.2	2.21	0.0015628
PPARG	NM_015869.3	-1.49	0.037795					LTB	NM_002341.1	2.21	0.0154961
PRKCD	NM_006254.3	-1.51	0.00488111					CD6	NM_006725.3	2.19	0.0127648
EDC3	NM_001142443.1	-1.53	1.309e-05					CCR1	NM_001295.2	2.19	0.0352781
C7	NM_000587.2	-1.56	0.0208924					CR1	NM_000651.4	2.18	0.0068422
CXCL16	NM_001100812.1	-1.58	0.0253833					IGLL1	NM_020070.2	2.17	0.0245187
UBC	NM_021009.3	-1.6	0.011037					IL1RAPL2	NM_017416.1	2.17	0.0360602
IKBKB	NM_001556.1	-1.62	0.00023114					BTK	NM_000061.1	2.16	0.0240827
LILRB2	NM_005874.1	-1.85	0.0332556					CCL26	NM_006072.4	2.14	0.0220226
GPATCH3	NM_022078.2	-1.89	0.00177432					LTA	NM_000595.2	2.12	0.011139
CD34	NM_001025109.1	-2.15	0.0244759					CD79B	NM_021602.2	2.1	0.0317085
DNAJC14	NM_032364.5	-2.17	0.00020466					TNFSF8	NM_001244.3	2.09	0.025013
STAT2	NM_005419.2	-2.25	0.00120285					LILRA1	NM_006863.1	2.06	0.0219024
FOXJ1	NM_001454.3	-2.87	0.033322					PRAME	NM_006115.3	2.04	0.0244451
CLEC4C	NM_203503.1	-3.23	0.0432393					CC2D1B	NM_032449.2	2.03	0.00057665
								IL26	NM_018402.1	2.01	0.00659015
								CD274	NM_014143.3	2.01	0.00997679
								CXCR1	NM_000634.2	1.99	0.00648836
								XCR1	NM_005283.2	1.99	0.0133134
								IFNG	NM_000619.2	1.98	0.0211037
								CCL20	NM_004591.1	1.97	0.0142477
								ITGAL	NM_002209.2	1.92	0.0209367
								CCR6	NM_031409.2	1.91	0.00601643
								RRAD	NM_004165.1	1.9	0.00768938
								CD58	NM_001779.2	1.87	0.0070368
								TLR7	NM_016562.3	1.85	0.0363249
								IL15	NM_172174.1	1.84	0.00214218
								IL12RB1	NM_005535.1	1.84	0.0301554
								CARD9	NM_052813.4	1.83	0.00194544
								LAIR2	NM_002288.3	1.82	0.00141096
								BAGE	NM_001187.1	1.82	0.0191678
								CD37	NM_001774.2	1.81	0.0466692
								TLR9	NM_017442.2	1.78	0.00018047
								ZAP70	NM_001079.3	1.77	0.0334839
								TLR5	NM_003268.3	1.76	0.00041218
								IL18R1	NM_003855.2	1.73	0.0470012
								CASP10	NM_032977.3	1.7	0.00397215
								MPPED1	NM_001044370.1	1.69	0.0342797
								VEGFA	NM_001025366.1	1.67	0.00400393
								MR1	NM_001531.2	1.61	0.00037698
								HAVCR2	NM_032782.3	1.58	0.0147539
								C5	NM_001735.2	1.52	0.00080214
								TCF7	NM_003202.2	1.52	0.00817037
								SIGIRR	NM_021805.2	1.52	0.0397909
								TREM2	NM_018965.3	1.51	0.0483191
								SH2B2	NM_020979.3	1.5	0.00388524
								RORA	NM_134261.2	1.47	0.0029197
								TFEB	NM_007162.2	1.47	0.00301014
								NOTCH1	NM_017617.3	1.47	0.00847567
								ITGA2B	NM_000419.3	1.46	0.0373764
								TICAM2	NM_021649.4	1.45	0.00787736
								PSEN2	NM_000447.2	1.43	3.45e-05
								NLRC5	NM_032206.4	1.43	0.0189489
								HPRT1	NM_000194.1	1.42	0.00016645
								CHUK	NM_001278.3	1.36	0.00653095
								MEF2C	NM_002397.3	1.36	0.0339772
								RIPK2	NM_003821.5	1.33	0.00537489
								PVR	NM_006505.3	1.33	0.0172232
								MAP2K1	NM_002755.2	1.33	0.0245935
								JAK3	NM_000215.2	1.3	0.0199568
								ZNF143	NM_003442.5	1.28	0.0202585
								SDHA	NM_004168.1	1.25	0.00255685
								SAP130	NM_024545.3	1.25	0.020272
								MAP3K5	NM_005923.3	1.24	0.00044088
								ETS1	NM_005238.3	1.23	0.0215829
								NUBP1	NM_001278506.1	1.21	0.0146583
								DDX50	NM_024045.1	1.18	0.0172295
								CD164	NM_006016.4	1.18	0.0238263
								CASP3	NM_032991.2	1.17	0.0137358
								ALCAM	NM_001627.3	1.17	0.0396982
								ITCH	NM_001257138.1	1.13	0.00857858
								CYLD	NM_015247.1	1.09	0.0130311
								MAP3K7	NM_145333.1	-1.06	0.0145122
								TIRAP	NM_148910.2	-1.12	0.0418346
								TAB1	NM_153497.2	-1.13	0.0189924
								TBP	NM_001172085.1	-1.13	0.0256503
								MAPK3	NM_001040056.1	-1.14	0.0441324
								RELA	NM_021975.2	-1.16	0.0472511
								PSMB7	NM_002799.2	-1.17	0.00151834
								CD47	NM_001777.3	-1.18	0.045852
								HDAC3	NM_003883.2	-1.19	0.0243615
								DHX16	NM_001164239.1	-1.19	0.0405722
								CD81	NM_004356.3	-1.19	0.0446322
								TMUB2	NM_024107.2	-1.22	0.0293733
								TNFSF12	NM_003809.2	-1.23	0.00701739
								TP53	NM_000546.2	-1.24	0.00951191
								EWSR1	NM_013986.3	-1.24	0.026438
								FAS	NM_000043.3	-1.26	0.0169938
								IL11RA	NM_147162.1	-1.27	0.00564348
								ILF3	NM_001137673.1	-1.27	0.00799784
								ABL1	NM_005157.3	-1.27	0.0235806
								JAK2	NM_004972.2	-1.28	0.00131245
								IFI16	NM_005531.1	-1.28	0.00295961
								IFNAR2	NM_000874.3	-1.28	0.0339917
								TYK2	NM_003331.3	-1.31	1.222e-05
								IGF2R	NM_000876.1	-1.32	0.0056842
								PSMB8	NM_004159.4	-1.32	0.026075
								EDC3	NM_001142443.1	-1.32	0.0482947
								PLA2G6	NM_001004426.1	-1.33	0.0117242
								IFIH1	NM_022168.2	-1.33	0.0224511
								TNFRSF1A	NM_001065.2	-1.34	0.0122991
								FYN	NM_002037.3	-1.36	0.0397285
								ICAM3	NM_002162.3	-1.37	0.0308655
								ENG	NM_001114753.1	-1.38	0.0248855
								IKBKG	NM_003639.2	-1.38	0.0271857
								TNFSF4	NM_003326.2	-1.4	0.0132072
								CD276	NM_001024736.1	-1.4	0.013603
								TUBB	NM_178014.2	-1.45	1.48e-05
								BST1	NM_004334.2	-1.47	0.00093742
								CASP8	NM_001228.4	-1.51	0.00058448
								DDX58	NM_014314.3	-1.52	0.0123378
								IL17A	NM_002190.2	-1.53	0.0315395
								CMA1	NM_001836.2	-1.53	0.040239
								TGFB2	NM_003238.2	-1.6	0.0231515
								ATG10	NM_001131028.1	-1.67	0.00039058
								CD200	NM_005944.5	-1.67	0.0261206
								NRP1	NM_003873.5	-1.68	0.0219187
								CD55	NM_000574.3	-1.8	1.807e-05
								GPATCH3	NM_022078.2	-1.82	0.0183402
								IL19	NM_013371.3	-1.83	0.0248093
								CXCL13	NM_006419.2	-1.84	0.0424834
								IL13RA1	NM_001560.2	-1.85	0.00021569
								ELK1	NM_005229.3	-1.88	0.0323706
								CCL7	NM_006273.2	-1.89	0.00263342
								COLEC12	NM_130386.2	-1.94	0.0437833
								TNFSF11	NM_003701.2	-2.02	0.0317403
								C7	NM_000587.2	-2.05	0.00062106
								CD9	NM_001769.2	-2.06	0.00049999
								BMI1	NM_005180.5	-2.07	0.00058014
								TLR4	NM_138554.2	-2.1	0.00266142
								BLK	NM_001715.2	-2.12	0.0355361
								STAT2	NM_005419.2	-2.13	0.0154404
								IFNL1	NM_172140.1	-2.13	0.0251525
								CDH1	NM_004360.2	-2.23	0.00961639
								PDGFC	NM_016205.2	-2.25	0.00062272
								TNFSF10	NM_003810.2	-2.37	0.00082934
								MCAM	NM_006500.2	-2.53	0.0225313
								CD34	NM_001025109.1	-2.61	0.0130994
								ISG15	NM_005101.3	-2.64	0.0430347
								PPARG	NM_015869.3	-2.75	0.00013787
								FOXJ1	NM_001454.3	-2.83	0.0291977
								FN1	NM_212482.1	-3.07	0.00282984
								IL4R	NM_000418.2	-3.09	0.00904872
								CFI	NM_000204.3	-3.14	1.998e-05
								COL3A1	NM_000090.3	-3.27	0.00052056
								THBS1	NM_003246.2	-3.27	0.00374264
								CLEC4C	NM_203503.1	-3.28	0.0431399
								RUNX1	NM_001754.4	-4.06	0.00212729
								THY1	NM_006288.2	-4.43	0.00279267
								DPP4	NM_001935.3	-5.65	0.00646212
