# Supplementary material for: Metformin Abrogates Age-Associated Ovarian Fibrosis
Source: Oxford University Press journal article supplement (doi:10.1158/1078-0432.ccr-19-0603), 2019-10-09
Supplement: 10780432ccr190603-sup-217177_4_supp_5812409_pyrfyy.docx [file 10780432ccr190603-sup-217177_4_supp_5812409_pyrfyy.docx]

**
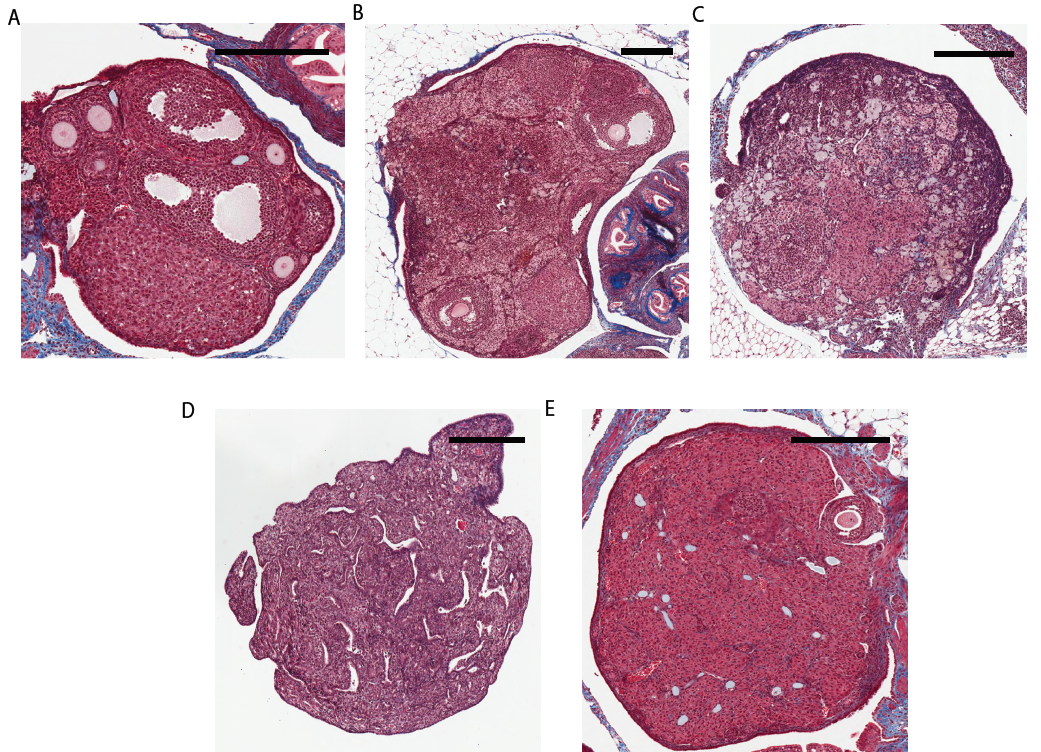
**

**Figure S1. Ovarian aging heterogeneity is not replicated by VCD treatment.** Representative images of ovarian histology in C57BL/lcrfa mice by Masson’s trichrome staining of **A.** 0-12 months, **B.** 12-20 months, **C.** >20 months with ovarian fibrosis, **D.** >20 months without ovarian fibrosis, and **E.** 60 days post-VCD treated ovaries. Collagens – blue, erythrocytes and fibrin – red, nuclei – purple. All scale bars = 300μm.
