# Supplementary material for: Metformin Abrogates Age-Associated Ovarian Fibrosis
Source: Oxford University Press journal article supplement (doi:10.1158/1078-0432.ccr-19-0603), 2019-10-09
Supplement: 10780432ccr190603-sup-217177_4_supp_5812410_pyrfmm.docx [file 10780432ccr190603-sup-217177_4_supp_5812410_pyrfmm.docx]

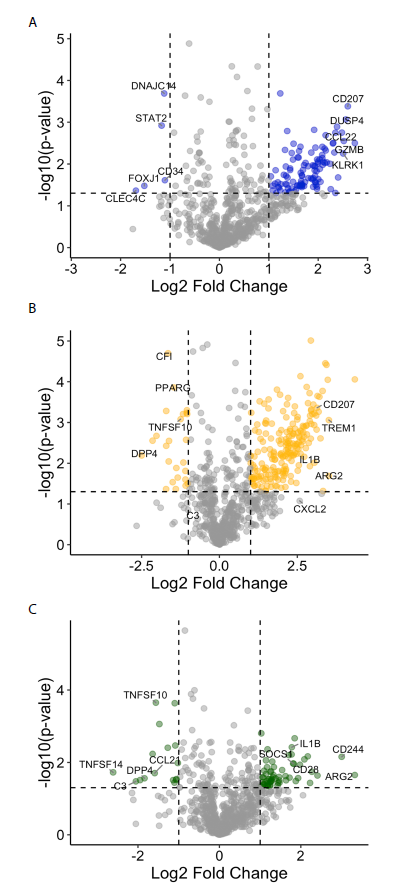


**Figure S3. Differential gene expression in non-fibrotic, fibrotic, and metformin ovaries with samples from women taking gliptins omitted.** Fold changes in RNA expression among all pairwise comparisons are presented. The top five upregulated and downregulated genes among all pairwise comparisons are labelled for **A.** fibrotic vs. non-fibrotic, **B.** metformin vs. non-fibrotic, and **C.** metformin vs. fibrotic.
