# Supplementary material for: Metformin Abrogates Age-Associated Ovarian Fibrosis
Source: Oxford University Press journal article supplement (doi:10.1158/1078-0432.ccr-19-0603), 2019-10-09
Supplement: 10780432ccr190603-sup-217177_4_supp_5812411_pyrf66.docx [file 10780432ccr190603-sup-217177_4_supp_5812411_pyrf66.docx]

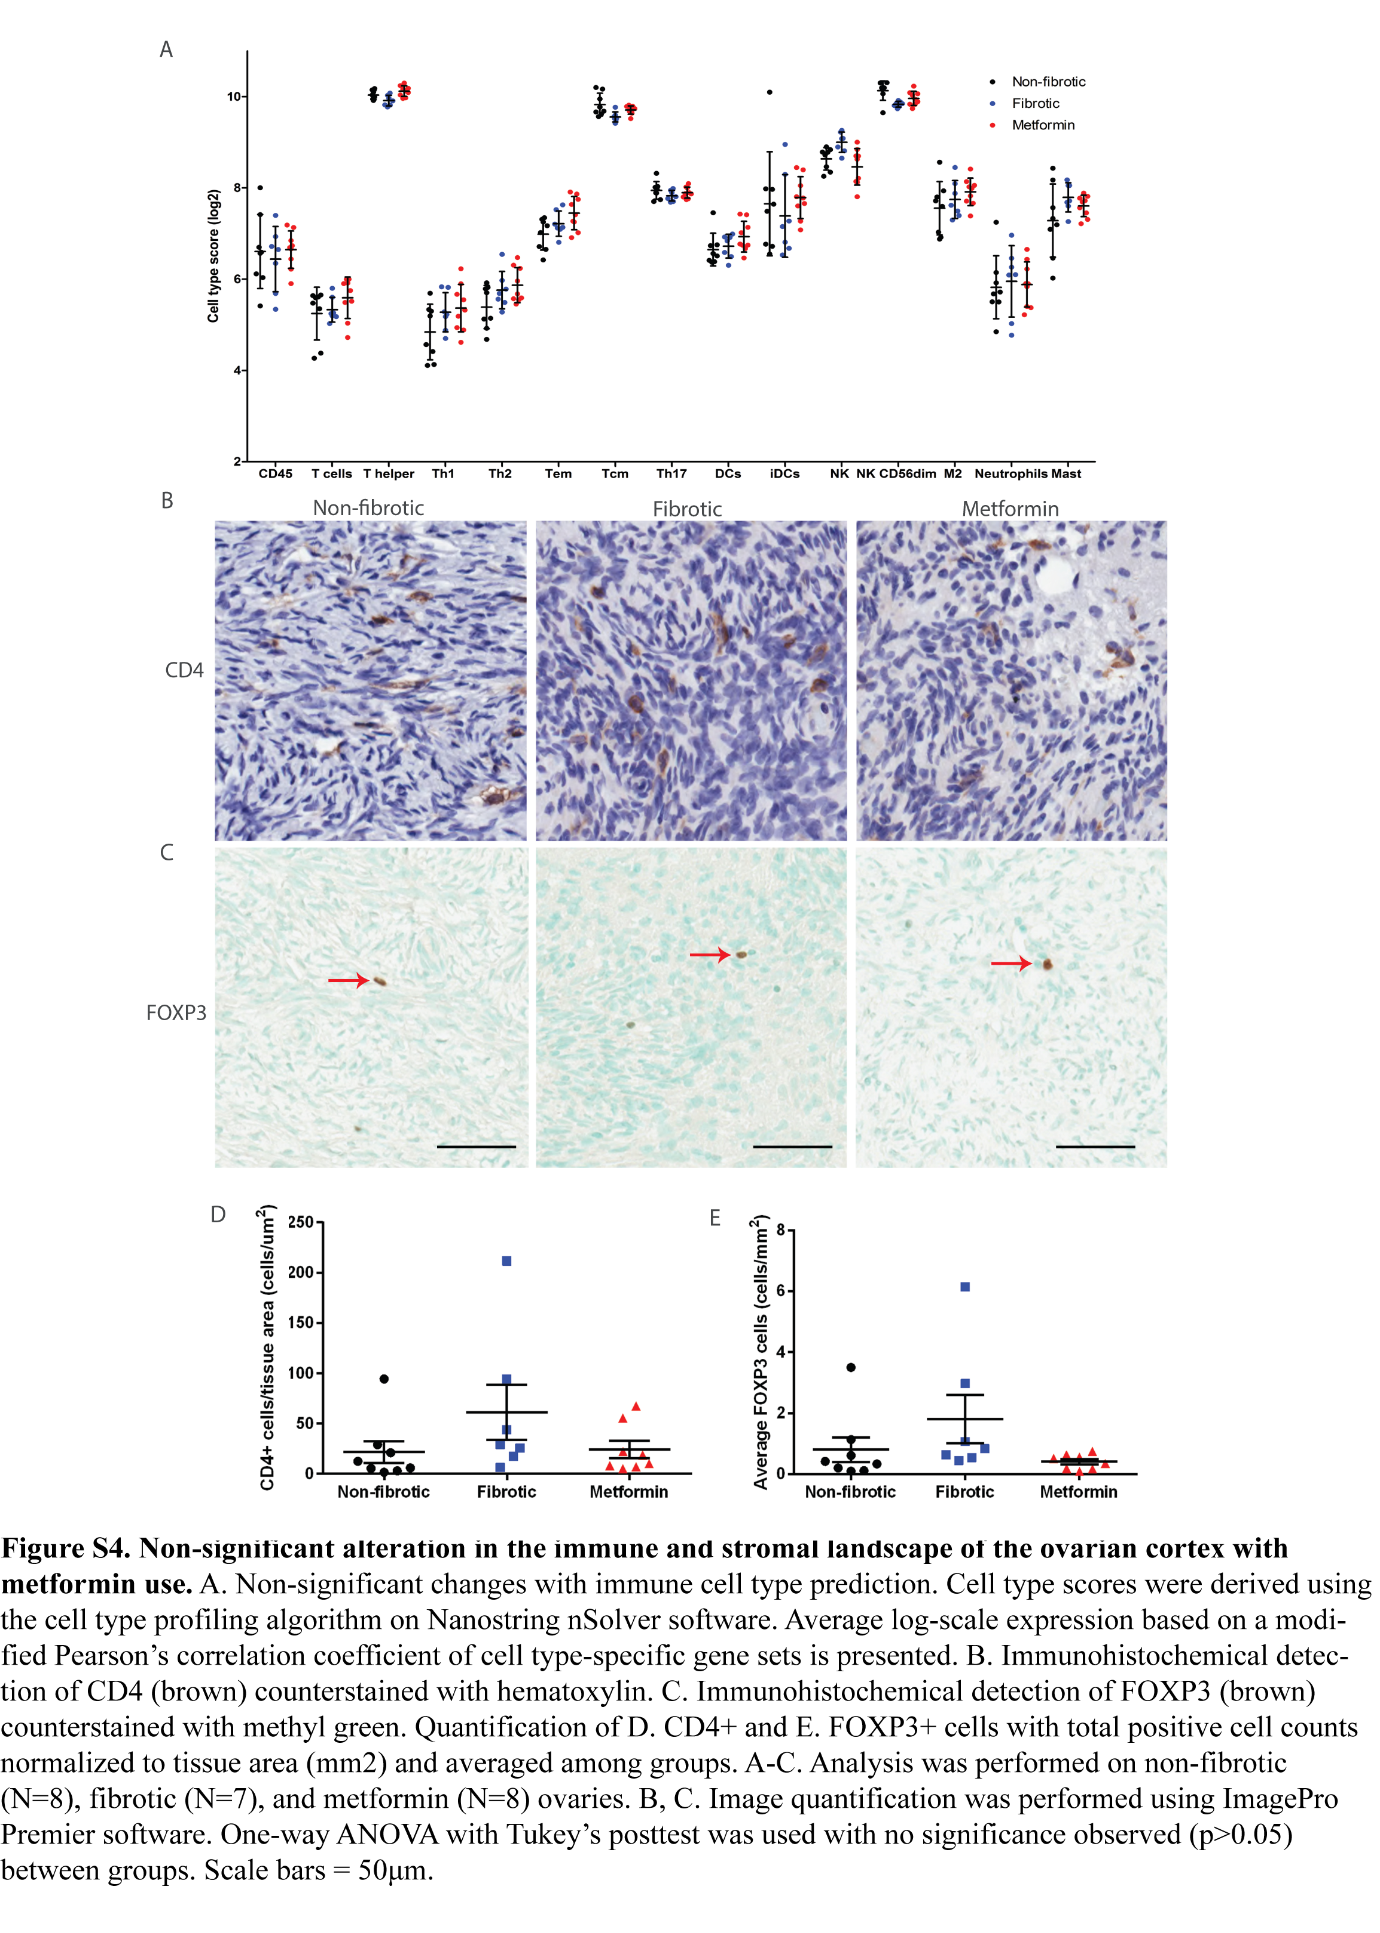


**Figure S4. Non-significant alteration in the immune and stromal landscape of the ovarian cortex with metformin use**. **A.** Non-significant changes with immune cell type prediction. Cell type scores were derived using the cell type profiling algorithm on Nanostring nSolver software. Average log-scale expression based on a modified Pearson’s correlation coefficient of cell type-specific gene sets is presented. **B.** Immunohistochemical detection of CD4 (brown) counterstained with hematoxylin. **C.** Immunohistochemical detection of FOXP3 (brown) counterstained with methyl green. Quantification of **D.** CD4+ and **E.** FOXP3+ cells with total positive cell counts normalized to tissue area (mm2) and averaged among groups. **A-C.** Analysis was performed on non-fibrotic (N=8), fibrotic (N=7), and metformin (N=8) ovaries. **B, C.** Image quantification was performed using ImagePro Premier software. One-way ANOVA with Tukey’s posttest was used with no significance observed (p>0.05) between groups. Scale bars = 50μm.
