# Supplementary material for: Metformin Abrogates Age-Associated Ovarian Fibrosis
Source: Oxford University Press journal article supplement (doi:10.1158/1078-0432.ccr-19-0603), 2019-10-09
Supplement: 10780432ccr190603-sup-217177_4_supp_5812412_pyrftt.docx [file 10780432ccr190603-sup-217177_4_supp_5812412_pyrftt.docx]

**
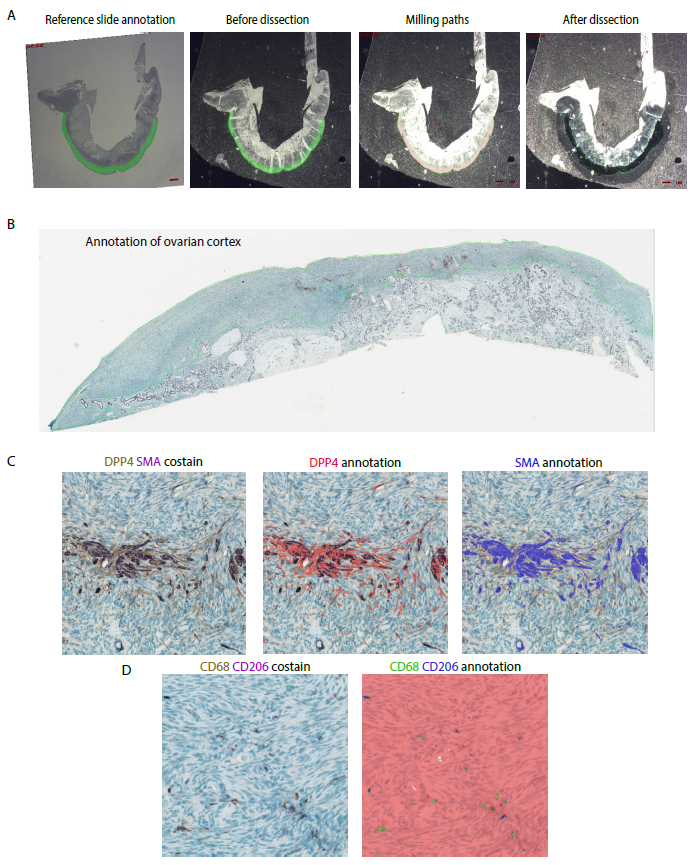
**

**Figure S2. Automated microdissection and immunohistochemical analysis of the human ovarian cortex. A.** Representative images of ovarian cortex microdissection. A hematoxylin stained reference slide is used as a guide to annotate the region to be collected (before dissection). The milling path is calculated and tissue is collected. **B-D.** Example of automated analysis of immunohistochemical staining of the human ovarian cortex using ImagePro Premier software. **B.** All immunohistochemical staining was quantified over the entire ovarian cortex of each patient sample, outlined in green. **C.** Representative annotations of DPP4 and SMA double immunohistochemistry (presented in **Fig. 3 f, g**). **D.** Representative annotations of CD68 and CD206 double immunohistochemistry (presented in **Fig. 3 b, c)**.
